# Supplementary material for: Study protocol for a randomised controlled trial evaluating the effect of prenatal omega-3 LCPUFA supplementation to reduce the incidence of preterm birth: the ORIP trial
Source: PubMed Central journal article supplement — BMJ Open. 2017 Sep 24;7(9):e018360. doi: 10.1136/bmjopen-2017-018360 (PMC5623491; doi:10.1136/bmjopen-2017-018360), 2017-09-24
Supplement: bmjopen-2017-018360.draft_revisions.pdf [file bmjopen-2017-018360.draft_revisions.pdf]

# BMJ Open

BMJ Open is committed to open peer review. As part of this commitment we make the peer review history of every article we publish publicly available.

When an article is published we post the peer reviewers' comments and the authors' responses online. We also post the versions of the paper that were used during peer review. These are the versions that the peer review comments apply to.

The versions of the paper that follow are the versions that were submitted during the peer review process. They are not the versions of record or the final published versions. They should not be cited or distributed as the published version of this manuscript.

BMJ Open is an open access journal and the full, final, typeset and author-corrected version of record of the manuscript is available on our site with no access controls, subscription charges or pay-per-view fees (<http://bmjopen.bmj.com>).

If you have any questions on BMJ Open's open peer review process please email [editorial.bmjopen@bmj.com](mailto:editorial.bmjopen@bmj.com)

# BMJ Open

## Study protocol for a randomized controlled trial evaluating the effect of prenatal omega-3 LCPUFA supplementation to reduce the incidence of preterm birth: The ORIP trial

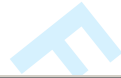

|                                 |                                                                                                                                                                                                                                                                                                                                                                                                                                                                                                                                                                                                                                                                                                                                                                                                                                                                                                                                               |
|---------------------------------|-----------------------------------------------------------------------------------------------------------------------------------------------------------------------------------------------------------------------------------------------------------------------------------------------------------------------------------------------------------------------------------------------------------------------------------------------------------------------------------------------------------------------------------------------------------------------------------------------------------------------------------------------------------------------------------------------------------------------------------------------------------------------------------------------------------------------------------------------------------------------------------------------------------------------------------------------|
| Journal:                        | <i>BMJ Open</i>                                                                                                                                                                                                                                                                                                                                                                                                                                                                                                                                                                                                                                                                                                                                                                                                                                                                                                                               |
| Manuscript ID                   | bmjopen-2017-018360                                                                                                                                                                                                                                                                                                                                                                                                                                                                                                                                                                                                                                                                                                                                                                                                                                                                                                                           |
| Article Type:                   | Protocol                                                                                                                                                                                                                                                                                                                                                                                                                                                                                                                                                                                                                                                                                                                                                                                                                                                                                                                                      |
| Date Submitted by the Author:   | 26-Jun-2017                                                                                                                                                                                                                                                                                                                                                                                                                                                                                                                                                                                                                                                                                                                                                                                                                                                                                                                                   |
| Complete List of Authors:       | Zhou, Shao; South Australian Health and Medical Research Institute, Healthy Mothers, Babies and Children; University of Adelaide School of Agriculture Food and Wine, FOODplus Research Centre<br>Best, Karen; South Australian Health and Medical Research Institute, Healthy Mothers, Babies and Children; University of Adelaide, Discipline of Paediatrics<br>Gibson, Robert; University of Adelaide School of Agriculture Food and Wine, FOODplus Research Centre<br>McPhee, Andrew; Women's and Children's Hospital, Department of Neonatal Medicine<br>Yelland, Lisa; South Australian Health and Medical Research Institute, Healthy Mothers Babies & Children; University of Adelaide, School of Public Health<br>Quinlivan, Julie; University of Notre Dame Australia, University of Notre Dame<br>Makrides, Maria; South Australian Health and Medical Research Institute, HMBC; University of Adelaide, Discipline of Paediatrics |
| <b>Primary Subject Heading</b>: | Obstetrics and gynaecology                                                                                                                                                                                                                                                                                                                                                                                                                                                                                                                                                                                                                                                                                                                                                                                                                                                                                                                    |
| Secondary Subject Heading:      | Paediatrics, Nutrition and metabolism, Public health                                                                                                                                                                                                                                                                                                                                                                                                                                                                                                                                                                                                                                                                                                                                                                                                                                                                                          |
| Keywords:                       | PREVENTIVE MEDICINE, PREGNANCY, PRETERM BIRTH, OMEGA-3 LONG CHAIN POLYUNSATURATED FATTY ACIDS, docosahexaenoic acid, MATERNAL DIET                                                                                                                                                                                                                                                                                                                                                                                                                                                                                                                                                                                                                                                                                                                                                                                                            |
|                                 |                                                                                                                                                                                                                                                                                                                                                                                                                                                                                                                                                                                                                                                                                                                                                                                                                                                                                                                                               |

SCHOLARONE™  
Manuscripts

1  
2  
3  
4  
5  
6  
7

## Study protocol for a randomized controlled trial evaluating the effect of prenatal omega-3 LCPUFA supplementation to reduce the incidence of preterm birth: The ORIP trial

Shao J Zhou<sup>1,2\*</sup>, Karen Best<sup>1,3\*</sup>, Robert Gibson<sup>2,5</sup>, Andrew McPhee<sup>4</sup>, Lisa Yelland<sup>1,6</sup>, Julie Quinlivan<sup>7</sup>, Maria Makrides<sup>1,3</sup>

8  
9  
\*Joint first authors

10  
11  
12

### Corresponding Author

13  
14  
Professor Maria Makrides

15  
16  
South Australian Health and Medical Research Institute, North Terrace, Adelaide

17  
18  
South Australia, Australia 5000

19  
20  
Maria.makrides@sahmri.com

21  
22  
61 08 8128 4416

23  
24  
25  
26

### Author details

27  
28  
29  
30  
<sup>1</sup> Healthy Mothers, Babies and Children, South Australian Health and Medical Research Institute, Adelaide, South Australia, Australia.

31  
32  
33  
<sup>2</sup> School of Agriculture, Food and Wine, The University of Adelaide, Adelaide, South Australia, Australia.

34  
35  
36  
<sup>3</sup> Discipline of Paediatrics, School of Medicine, The University of Adelaide, Adelaide, South Australia, Australia.

37  
38  
39  
<sup>4</sup> Neonatal Services, Women's and Children's Health Network, Adelaide, South Australia, Australia.

40  
41  
<sup>5</sup> FOODplus Research Centre, The University of Adelaide, South Australia, Australia.

42  
43  
<sup>6</sup> School of Public Health, The University of Adelaide, Adelaide, South Australia, Australia.

44  
45  
46  
<sup>7</sup> Institute for Health Research, University of Notre Dame Australia, Fremantle, Western Australia, Australia

47  
48  
49  
\*Shao J Zhou and Karen Best contributed equally to this paper

50  
51  
52  
**Word count** = 4524

53  
54  
55  
56  
**Keywords:** Pregnancy, preterm birth, premature birth, docosahexaenoic acid, omega-3 long chain polyunsaturated fatty acids, prevention, maternal diet

## Abbreviations

AA, arachidonic acid; ACTRN, Australia and New Zealand Clinical Trial Registry; CRF, case report form; DOMInO, DHA to Optimise Mother and Infant Outcome; DHA, docosahexaenoic acid; DMAC, data management and analysis centre; EPTB, Early preterm birth; EPA, eicosapentaenoic acid; EDD, estimated date of delivery; GA, gestational age; Good Clinical Practice; GMP, code of good manufacturing practice; HREC, Human Research Ethics Committee; ID, Identifier; LA, linoleic acid; LCPUFA, long-chain polyunsaturated fatty acids; mg, milligram;  $\omega$ -3, omega-3;  $\omega$ -6, omega-6; ORIP, the acronym is derived from 'Omega-3 fatty acids to reduce the incidence of prematurity'; NHMRC, National Health and Medical Research Council of Australia; RR, Relative Risk; SAE, Serious Adverse Event.

**ABSTRACT**

**Introduction:** Preterm birth accounts for more than 85% of all perinatal complications and deaths. Seventy-five percent of early preterm births occur spontaneously and without identifiable risk factors. The need for a broadly applicable, effective strategy for primary prevention is paramount. Secondary outcomes from the Docosahexaenoic Acid (DHA) to Optimize Mother Infant Outcome (DOMInO) trial showed that maternal supplementation until delivery with omega-3 long chain polyunsaturated fatty acid (LCPUFA), predominantly as DHA, resulted in a 50% reduction in the incidence of early preterm birth, but also an increase in the incidence of post-term induction or post-term pre-labour caesarean section due to extended gestation. We aim to determine the effectiveness of supplementing the maternal diet with omega-3 LCPUFA until 34 weeks' gestation on the incidence of early preterm birth.

**Methods and analysis:** This is a multicentre, parallel group, randomised, blinded and controlled trial. Women less than 20 weeks' gestation with a singleton or multiple pregnancy and able to give informed consent are eligible to participate. Women will be randomised to receive high DHA fish oil capsules or control capsules without DHA. Capsules will be taken from enrolment until 34 weeks' gestation. The primary outcome is the incidence of early preterm birth, defined as delivery before 34 completed weeks' gestation. Key secondary outcomes include length of gestation, incidence of post-term induction or pre-labour caesarean section and spontaneous early preterm birth. The target sample size is 5540 women (2770 per group), which will provide 85 % power to detect an absolute reduction in the incidence of preterm birth of 1.16% (from 2.45% to 1.29%) between the DHA and control group (two sided  $\alpha = 0.05$ ). The primary analysis will be based on the intention-to-treat principle.

**Ethics and dissemination:** This study has been approved by the Human Research Ethics Committee of each study site. Study findings will be disseminated via peer-reviewed publication, conference presentations, informing participants with a lay summary and the wider community through social media.

1  
2 **Trial Registration:** Australia and New Zealand Clinical Trial Registry Number:  
3

4 ACTRN12613001142729  
5  
6

7 **Strengths and limitations of this study**  
8

- 9
- 10 • This study is the largest randomised controlled trial with adequate power that is  
11 designed to assess the effect of  $\omega$ -3 LCPUFA supplementation in pregnancy on the  
12 incidence of early preterm birth as the primary outcome.  
13  
14
  - 15 • The study uses an innovative intervention strategy, which is unique compared with  
16 other trials in this field. The intervention targets the period before and during the time  
17 when early preterm birth is likely to occur and it is ceased at 34 weeks' gestation, at  
18 which time early preterm birth has been prevented. This strategy may reduce the risk of  
19 post-term birth.  
20  
21
  - 22 • The study assesses maternal LCPUFA status at baseline and at the end of the  
23 intervention period, providing an independent biomarker of compliance, in addition to  
24 maternal self-report and capsule back count.  
25  
26
  - 27 • The study is conducted in an industrialised setting where intake of  $\omega$ -3 LCPUFA is low.  
28 Findings from this study may not be applicable in populations with high intake of  $\omega$ -3  
29 LCPUFA.  
30  
31  
32  
33  
34  
35  
36  
37  
38  
39  
40  
41  
42  
43  
44  
45  
46  
47  
48  
49  
50  
51  
52  
53  
54  
55  
56  
57  
58  
59  
60

## INTRODUCTION

### Background

Preterm birth, or birth before 37 completed weeks of pregnancy, is the leading cause of death in newborns, accounting for more than 85% of all perinatal complications and death.<sup>1</sup> It is estimated that 10% of births (13 million babies each year worldwide) are preterm and 20% of these preterm births occur before 34 weeks, these being referred to as early preterm birth (EPTB). It is EPTB that is the major cause of perinatal mortality, serious neonatal morbidity and moderate to severe childhood disability in developed countries.<sup>2-4</sup> Effective, broadly applicable primary prevention strategies to reduce the risk of EPTB are lacking.

Prostaglandins and other lipid mediators derived from omega-6 ( $\omega$ -6) and omega-3 ( $\omega$ -3) fatty acids play essential roles in normal and pathologic initiation of labour.<sup>5,6</sup> The fetoplacental unit is supplied with long chain polyunsaturated fatty acid (LCPUFA) from the maternal circulation, which is influenced by maternal LCPUFA intake and endogenous synthesis.

Prostaglandins derived from  $\omega$ -6 arachidonic acid (AA) are countered by those derived from  $\omega$ -3 LCPUFA within the same tissues. The balance between the metabolites of  $\omega$ -3 and  $\omega$ -6 fatty acids play an important role in the maintenance of normal gestation length and are a critical element in cervical ripening and the initiation of labour.<sup>7</sup> If local production of  $\omega$ -6 derived prostaglandins within the fetoplacental unit is too high, or local accumulation of  $\omega$ -3 LCPUFA is too low, the cervix may prematurely ripen and uterine contractions increase, which may in turn lead to preterm birth or EPTB.

Current Western diets are low in  $\omega$ -3 LCPUFA.<sup>8</sup> The World Health Organization recommends an intake of 300 mg/d of  $\omega$ -3 LCPUFA for pregnant women, however, the median intake in Australian women of child bearing age is only 29 mg/day<sup>9</sup> compared with 1000mg/d in women from nations with high-fish consumption such as Japan, Korea and Norway. The intake of  $\omega$ -3 LCPUFA is further reduced among pregnant women due to a reduced intake of all fish

1  
2 following advisories for pregnant women to avoid specific long-lived predatory fish due to the  
3 concern about mercury contamination.<sup>10</sup> The level of  $\omega$ -3 LCPUFA intake estimated to achieve  
4 normal rises in the fetoplacental unit for the maintenance of a full term pregnancy is well  
5 above the intake of many pregnant women, highlighting a potential insufficiency for the uterus  
6 and fetoplacental unit. Optimising  $\omega$ -3 LCPUFA intake in pregnancy may restore the balance  
7 between  $\omega$ -3 and  $\omega$ -6 fatty acids and reduce the risk of preterm birth.  
8  
9

10  
11 At the time the trial commenced, only 2 of the 6 included trials in the Cochrane review<sup>11</sup> of  
12 marine oil supplementation in pregnancy reported the effect on EPTB. Both trials<sup>12 13</sup> were  
13 conducted in high risk pregnancies designed to assess the effect of  $\omega$ -3 LCPUFA  
14 supplementation to prevent reoccurrence of intrauterine growth restriction, preterm birth or  
15 pregnancy induced hypertension. From these two relatively small trials (total of 860 women), it  
16 was seen that women allocated to receive fish oil had a lower risk of EPTB compared with  
17 control (relative risk (RR) 0.69, 95% CI 0.49 to 0.99). Systematic reviews<sup>11 14 15</sup> have shown no  
18 difference in the incidence of antepartum hospitalisation, caesarean section, eclampsia or other  
19 serious maternal morbidity between treatment ( $\omega$ -3 LCPUFA supplements) and control groups.  
20 The relative risk of miscarriage, stillbirth and neonatal death also did not differ between the  
21 groups<sup>11 14 15</sup>. None of the included trials reported the effect of  $\omega$ -3 LCPUFA supplementation  
22 on EPTB in the general population of pregnant women.  
23  
24  
25  
26  
27  
28  
29  
30  
31  
32  
33  
34  
35  
36  
37  
38  
39  
40  
41  
42  
43

44 The strongest evidence to support the efficacy of  $\omega$ -3 LCPUFA supplementation to reduce  
45 EPTB comes from our Docosahexaenoic Acid [DHA] to Optimize Mother Infant Outcome  
46 [DOMInO] trial<sup>16</sup>, the largest trial to date of  $\omega$ -3 LCPUFA supplementation in pregnancy.  
47 DOMInO was designed to assess the effect of  $\omega$ -3 LCPUFA supplementation during the last  
48 half of pregnancy on the prevalence of postnatal depression in women and on early childhood  
49 neuro-developmental outcomes. We enrolled 2399 women from 5 perinatal centres around  
50 Australia who were randomly assigned to receive identical looking capsules containing either  
51  
52  
53  
54  
55  
56  
57  
58  
59  
60



1  
2 fish oil concentrate (900 mg  $\omega$ -3 LCPUFA/day) or a blend of vegetable oils (no  $\omega$ -3 LCPUFA)  
3  
4 from 20 weeks' gestation until birth. In a pre-specified secondary analysis, there were fewer  
5  
6 EPTB in the  $\omega$ -3 LCPUFA supplemented group compared with control (1.09% vs. 2.25%,  
7  
8 adjusted RR 0.49, 95% CI 0.25 to 0.94,  $p=0.03$ ) and fewer admissions to level three intensive  
9  
10 care (1.75% vs. 3.08%, RR 0.57, 95% CI 0.34 to 0.97,  $p=0.04$ ). Similar findings were reported  
11  
12 in a smaller US trial (n=301), the Kansas University DHA Outcomes (KUDOS) Study<sup>17</sup>, which  
13  
14 showed that supplementation with 600 mg of DHA daily from mid-pregnancy until birth  
15  
16 resulted in a reduction in the incidence of EPTB (0.6% vs. 4.8%,  $p=0.025$ ). The effect of DHA  
17  
18 supplementation in pregnancy in lowering the risk of EPTB observed in both the DOMInO and  
19  
20 KUDOS trials is consistent with the Cochrane review<sup>18</sup> published before these two trials.  
21  
22 Despite these encouraging findings, results have been viewed with caution by researchers and  
23  
24 clinicians because EPTB was a secondary outcome of the DOMInO and KUDOS trials. A  
25  
26 recent update to this Cochrane review (publication pending) includes 54 randomised trials with  
27  
28 a total of >15,000 participants. Results show a clear reduction in EPTB (RR 0.61, 95% CI 0.46  
29  
30 to 0.81; 9 RCTs; n = 4351) for supplementation compared with placebo<sup>19</sup>. Our DOMInO trial  
31  
32 supports the safety data from previous systematic reviews, however there were more post-term  
33  
34 births requiring obstetric intervention (induction or caesarean section) in the  $\omega$ -3 LCPUFA  
35  
36 supplemented group compared with control (17.59% vs. 13.72%, adjusted RR 1.28, 95% CI  
37  
38 1.06 to 1.54,  $p=0.01$ ). To determine both efficacy and safety of this intervention, we therefore  
39  
40 planned to undertake a further trial with adequate power to assess the effect of  $\omega$ -3 LCPUFA  
41  
42 supplementation in pregnancy on EPTB as the primary outcome, with a unique design ceasing  
43  
44 the intervention at 34 weeks' gestation to reduce the risk of post-term birth.  
45  
46  
47  
48  
49  
50

## 51 Hypotheses

52  
53  
54  
55 Optimising  $\omega$ -3 LCPUFA intake in pregnancy will lead to lower risk of EPTB.  
56  
57  
58  
59  
60

## METHODS

### Trial design

The ORIP trial is designed as a randomised, controlled, clinician, researcher and participant/family blinded, multicentre trial with two parallel groups and a primary outcome of incidence of EPTB, defined as delivery before 34 completed weeks' gestation.

### Participating Centres

The sponsoring institution and Trial Coordinating Centre is the South Australian Health and Medical Research Institute based at the Women's and Children's Hospital, Adelaide, South Australia. The trial is being conducted in the following six centres in Australia: Women's & Children's Hospital, Flinders Medical Centre and Lyell McEwin Hospital in South Australia; Joondalup Health Campus, Western Australia; Werribee Mercy Hospital, Werribee, Victoria; and Mater Mothers Hospital, Brisbane, Queensland.

### Study Population

Participants are pregnant women less than 20 weeks' gestation.

### Eligibility Criteria

Pregnant women are approached by trained clinical trial personnel in the antenatal clinic of participating centres.

#### *Inclusion Criteria*

Women must meet all the following criteria to be enrolled in this study:

- Singleton or multiple pregnancy and less than 20 weeks' gestation.
- Able to give informed consent.

#### *Exclusion criteria*

Women must not have any of the following criteria to be enrolled in this study:

- Fetus with a known fetal abnormality.
- Taking dietary supplements containing LCPUFA > 150mg/day.
- Taking dietary supplements containing LCPUFA  $\leq$ 150mg/day and are not willing to stop.
- Bleeding disorders where fish oil is contraindicated or on anticoagulant therapy.
- History of drug or alcohol abuse.

### Study treatments

Participating women will be randomised to high-DHA fish oil capsules or vegetable oil capsules. The study capsules are identical in colour, size, shape and packaging and are iso-caloric. Women will be asked to consume three capsules per day.

#### *DHA Capsules*

Each 500mg DHA enriched fish oil capsule contains approximately 300mg of  $\omega$ -3 LCPUFA. Women will be asked to take three capsules per day orally, which will provide approximately 1g of  $\omega$ -3 LCPUFA (800mg of DHA and 100 mg of eicosapentaenoic acid [EPA]) per day. The remaining portion of oil consists of monounsaturated and saturated fatty acids.

#### *Control Capsules*

The control capsules (also 500mg in weight) contain a blend of vegetable oils (canola, sunflower and palm oils) with a trace of tuna oil (12.6mg  $\omega$ -3 LCPUFA) to assist with blinding. This blend of oil matches the fatty acid composition of the typical Australian diet.

#### *Manufacture of study capsules*

The active and control capsules are manufactured in a licensed facility (licensed according to the Code of Good Manufacturing Practice (GMP)) and have been donated to the trial by Efamol Ltd/Wassen International Ltd. The capsules are packaged and labelled in accordance with GMP including an individual product identifier (ID), batch number, expiry date and the statement “for clinical trial use only”. The pharmacist or the investigator’s designee maintain

1  
2 accurate records of the receipt of all study capsules, including dates of receipt. Unused study  
3 capsules will be destroyed in compliance with applicable regulations.  
4  
5  
6

### 7 **Monitoring adherence to study treatment**

8  
9  
10 Research personnel in each centre will maintain regular contact with participating women to  
11 monitor and encourage capsule adherence and study compliance and answer any questions as  
12 they arise. Women are asked to return unused capsules at the final study visit (34 weeks'  
13 gestation) and the proportion of capsules returned serves as an additional measure of  
14 compliance. A finger prick blood specimen collected from the woman at this final visit will be  
15 used in fatty acid analysis as an independent biomarker of adherence. All clinical care for  
16 women involved in this trial will be undertaken by her designated obstetric/midwifery care  
17 provider.  
18  
19  
20  
21  
22  
23  
24  
25  
26  
27  
28

### 29 **Outcome Measures**

30  
31  
32 The primary outcome of this trial is the incidence of EPTB, defined as delivery before 34  
33 completed weeks' gestation. Gestational age (GA) in days at delivery for primary and  
34 secondary outcomes will be determined from the estimated date of delivery (EDD) using the  
35 equation  $[280 - (EDD - \text{date of birth})]$ . EDD will be determined using a combination of  
36 maternal menstrual dating and ultrasound dating in accordance with established obstetric  
37 practice, as outlined in Figure 1.  
38  
39  
40  
41  
42  
43  
44  
45

46 Key Secondary outcomes:

- 47 • Length of gestation
- 48 • Post-term induction or post-term pre-labour caesarean section
- 49 • Preterm birth (<37 completed weeks)
- 50 • Spontaneous EPTB,
- 51 • Birth weight
- 52 • Low birth weight (< 2500g).
- 53
- 54
- 55
- 56
- 57
- 58
- 59
- 60

- Admission to Neonatal Intensive Care Unit
- Perinatal Death (stillbirth and death within first 28 days of birth)

#### Other Outcomes

- Spontaneous preterm birth, pre-labour rupture of membranes, pre-labour, preterm rupture of membranes.
- Birth length, birth head circumference, small for GA, very small for GA, large for GA, very large for GA.
- The length of hospital stay of infants and mothers, length of admission in Neonatal Intensive Care Unit.
- Pregnancy and labour outcomes including; gestational diabetes, pregnancy induced hypertension, pre-eclampsia, eclampsia, maternal use of antibiotics, caesarean section, estimated blood loss at birth and post-partum haemorrhage.
- Incidence of Serious Adverse Event (SAE) defined as; maternal, neonatal or fetal deaths (still birth); fetal loss (miscarriage); maternal admissions to intensive care; admissions to intensive care for infants born after 34 weeks' gestation; and major congenital anomalies.
- Neonatal complications including jaundice (requiring phototherapy), hypoglycaemia (requiring intravenous dextrose infusion), neonatal convulsion, brain injury (including intra-ventricular haemorrhage), retinopathy of prematurity, sepsis, necrotising enterocolitis and duration of supplemental oxygen. The definitions and classifications of these neonatal complications are in accordance with the Australian and New Zealand Neonatal Network Data Dictionary.<sup>20</sup>
- Other side effects and tolerability of DHA supplementation assessed through data collected in the case report form.

## Participant Timeline

Women will be randomised and commence study treatment capsules from enrolment (<20 weeks' gestation) until 34 weeks' gestation or birth, whichever occurs first. At enrolment, following informed consent and prior to commencement of study treatment, research personnel will collect a finger prick blood sample for baseline fatty acid status. The woman's height and weight will be measured and baseline clinical and demographic data collected. Research personnel will contact the participant two weeks following the enrolment visit and again when the woman is 28 weeks' gestation to ascertain capsule adherence and record adverse events. At 34 weeks' gestation participating women will attend a clinic appointment for collection of a finger prick blood sample for fatty acid analysis and unused capsules are returned and counted. Six weeks following delivery, research personnel will extract details of pregnancy, labour and birth from the woman and her baby's medical records for primary and secondary outcome data; see Figure 2 for a summary of the ORIP trial schema.

## Sample Size

Our previous trial of DHA supplementation of pregnant women, the DOMInO trial<sup>16</sup>, included women with singleton pregnancies and treatment resulted in a 1.16% absolute reduction (from 2.25% to 1.09%) in the incidence of EPTB. This reduction occurred in the presence of non-adherence resulting from women assigned to the intervention failing to take the trial supplements as directed, and control women taking prenatal supplements containing low dose  $\omega$ -3 LCPUFA. Similar levels of non-adherence are expected in the ORIP trial. Inclusion of women with multiple pregnancies in the ORIP trial is expected to result in a small increase in the incidence of EPTB in both treatment groups, since EPTB is more common in multiple pregnancies. To demonstrate an absolute reduction in the incidence of EPTB of 1.16% (from 2.45% to 1.29%) with 85% power and overall two-sided alpha=0.05 (alpha=0.049 at the final analysis), a sample size of 2631 per group (i.e. 5262 total) is required. Allowing for a loss to follow up of 5%, a total of 5540 women is required to ensure adequate power for the primary

1  
2 outcome. Since EPTB is a mother level outcome, the sample size calculations define the  
3  
4 number of mothers that should be recruited and no adjustment for clustering due to multiple  
5  
6 pregnancies is required for this outcome.  
7  
8

### 9 10 **Recruitment**

11  
12 Women will be approached to enter the trial by research staff at the time of attending their  
13  
14 routine antenatal visit at one of the centres involved. Pregnant women will also be informed  
15  
16 about the trial by display of approved advertising material which will be circulated in hard  
17  
18 copy and via social media avenues. A participant information sheet describing the purpose of  
19  
20 the study, the procedures to be followed, and the risks and benefits of participation will be  
21  
22 explained to interested women. Following a screening process to ensure inclusion and  
23  
24 exclusion criteria are met, the investigator, or nominee will conduct the informed consent  
25  
26 discussion and will check that information provided is understood and answer any questions  
27  
28 about the study. A record of all women screened and their enrolment status will be maintained  
29  
30 to adhere to the consolidated standards for the reporting of randomised controlled trials.<sup>21</sup>  
31  
32

33  
34 Women may withdraw their involvement in the trial at any time and wherever possible the  
35  
36 reason for withdrawal will be recorded.  
37  
38

### 39 40 **Randomisation procedures**

41  
42 Once the consent process has been documented by signing of the written consent form, the  
43  
44 participant will be randomised using a web-based randomisation service. Stratification will be  
45  
46 by centre and current supplement use (no LCPUFA vs  $\leq 150$ mg LCPUFA/day prior to  
47  
48 randomisation). Allocation follows a computer-generated randomisation schedule with  
49  
50 balanced variable blocks, prepared using ralloc.ado version 3.7.5 in Stata version 12.1 by an  
51  
52 independent statistician who is not involved with trial participants or data analysis. A unique  
53  
54 six-digit study ID and a study pack with a unique product ID are assigned. The study ID  
55  
56  
57  
58  
59  
60

1  
2 identifies the randomised woman and the product ID identifies a pack of five bottles of either  
3  
4 active or control capsules, pre-packaged corresponding to the randomisation schedule.  
5  
6

### 7 8 **Blinding**

9  
10 Participants and their family, care providers, data collectors, outcome assessors, research  
11  
12 personnel and data analysts will all be blinded to randomisation group. The intervention and  
13  
14 control capsules are identical in shape, size, colour, packaging and labelling and uniquely  
15  
16 identified only by the product ID. In the DOMInO trial, we identified that more women in the  
17  
18 intervention group correctly guessed their group allocation. We therefore added a small amount  
19  
20 of tuna oil (5%) to the control capsules to enhance blinding of study participants. The  
21  
22 randomisation code for an individual participant may be un-blinded in an emergency if the Site  
23  
24 Investigator decides a participant cannot be adequately treated without knowing their study  
25  
26 treatment allocation. The Principal Investigator will be notified and must contact the Data  
27  
28 Management and Analysis Centre, where the randomisation list is securely stored. The time,  
29  
30 date, study ID of the participant and reason for un-blinding must be documented and events  
31  
32 leading to the emergency un-blinding will be recorded.  
33  
34  
35  
36  
37

### 38 **Data collection and trial management**

39  
40 A purpose-built web-based clinical trial management information system (CTMS) with  
41  
42 password protection and defined user-level access is used to facilitate trial management. A  
43  
44 record of all women approached, screened for eligibility, and consented is recorded in real time  
45  
46 in the CTMS. Once consented and randomised, the CTMS automatically calculates study  
47  
48 milestones for each participant. This information is readily available for clinical trial staff to  
49  
50 enable scheduling of appointments and sample collection. Data entered by individual study  
51  
52 centres is routinely scrutinized by the Coordinating Centre to monitor protocol adherence and  
53  
54 study progress. Summary reports including screening data, enrolment, appointment attendance,  
55  
56 sample collection, serious adverse events and study completion are generated from the CTMS  
57  
58  
59  
60



1  
2 and reviewed at monthly trial steering committee meetings. Site monitoring visits to ensure  
3 compliance with good clinical practice and the study protocol are conducted at site start-up and  
4 then six monthly or as required to ensure the integrity of the trial.  
5  
6  
7

8  
9  
10 Data are collected by trained clinical trial staff at each participating centre onto carbon copy  
11 paper case report forms (CRF). Carbon copies of the completed CRF remain on site at  
12 participating centres with original copies being mailed to the Data Management and Analysis  
13 Centre at the University of Adelaide for data management including data entry and data  
14 cleaning. Data validity checks are completed by data entry personnel and data queries posted to  
15 the CTMS for resolution by participating centres. Data queries generated by statisticians during  
16 regular blinded reviews of data quality and batch checks are also managed through the CTMS.  
17  
18 Electronic data are stored on secure servers at the Data Management and Analysis Centre and  
19 released only to persons authorised to receive those data. Following study completion, copies  
20 of study documents are retained at each study site or in archives. Documents held at the  
21 Coordinating Centre will be retained for at least 30 years after study completion in line with  
22 the data retention schedules for research involving minors<sup>22</sup>. At the completion of this time,  
23 documentation will be destroyed using confidential document disposal. Electronic data will be  
24 stored indefinitely on secure servers with access only granted to authorised study personnel.  
25  
26  
27  
28  
29  
30  
31  
32  
33  
34  
35  
36  
37  
38  
39  
40  
41

## 42 **Statistical methods**

43  
44 All participants will be analysed according to the group to which they were randomised  
45 (intention-to-treat principle) for the primary analysis. The primary outcome of EPTB will be  
46 compared between intervention and control groups using a log binomial regression model.  
47  
48 Adjustment will be made for the stratification variables centre and supplements, and results  
49 will be presented as a relative risk with confidence interval and 2-sided p-value. Statistical  
50 significance will be assessed at an alpha of 0.049 to account for the pre-specified interim  
51 analysis (see below) using the O'Brien-Fleming approach. Key secondary and other outcomes  
52  
53  
54  
55  
56  
57  
58  
59  
60

1  
2 will be compared between treatment groups using log binomial regression models for binary  
3  
4 outcomes and linear regression models for continuous outcomes with no adjustment for  
5  
6 multiple comparisons. Clustering due to multiple pregnancies and repeat participation in the  
7  
8 trial will be taken into account where applicable using generalised estimating equations.

9  
10 Secondary analyses will be performed for the primary outcome and related key secondary and  
11  
12 other outcomes to test for evidence of effect modification by pregnancy status (single vs  
13  
14 multiple pregnancy), history of preterm birth and baseline DHA. Missing data will be  
15  
16 addressed using multiple imputation under a missing at random assumption. Sensitivity  
17  
18 analyses will be performed using the original un-imputed data. A secondary per-protocol  
19  
20 analysis will be performed for the primary outcome including only women who were  
21  
22 compliant with the protocol. Two separate definitions of compliance will be used. First,  
23  
24 women will be considered compliant if they returned their remaining capsules at the end of the  
25  
26 trial and consumed at least 75% of the number of capsules expected to be consumed. Second,  
27  
28 women will be considered compliant if they had the 28-week telephone contact and reported  
29  
30 they had missed less than 7 capsules in the last week out of the recommended 21 capsules.  
31  
32  
33  
34

35  
36 All analyses will follow a pre-specified statistical analysis plan. There is a single planned  
37  
38 interim analysis of the primary outcome to be performed after data collection is complete for  
39  
40 the first 50% of the target number of randomized participants.  
41  
42

#### 43 44 **Data monitoring**

45  
46 An independent Data Monitoring Committee (DMC) has been set up to review the progress of  
47  
48 the trial and provide feedback to the Trial Steering Committee. The DMC reviews general  
49  
50 study progress (recruitment, compliance, loss to follow-up), the EPTB event rate and key  
51  
52 secondary/safety outcomes. The committee meets annually or as required and consists of a  
53  
54 neonatologist, obstetrician and statistician with clinical trials expertise. The DMC will be  
55  
56 responsible for reviewing the results of the interim analysis.  
57  
58  
59  
60

1  
2 An independent (blinded) SAE Committee has been established to review SAEs. There are no  
3  
4 SAEs which would be anticipated as a unique consequence of participation in the trial,  
5  
6 however all deaths, admissions to an intensive care unit of mothers or of infants born after 34  
7  
8 completed weeks' gestation, and major congenital abnormalities are to be reported. The SAE  
9  
10 Committee includes experts in obstetrics, neonatology, pathology and midwifery who are not  
11  
12 involved in the trial. The primary role of the SAE Committee is to review all SAEs and  
13  
14 determine whether there is any likelihood that involvement in the trial could have contributed  
15  
16 to the event. Determinations of causality will be made from medical records retrieved for this  
17  
18 purpose. This committee meets quarterly, or as required.  
19  
20  
21  
22

## 23 **ETHICS AND DISSEMINATION**

### 24 25 26 **Research ethics approval**

27  
28  
29 This protocol and the informed consent and participant information document have been  
30  
31 approved by the Human Research Ethics Committee (HREC) of each study site. Women's and  
32  
33 Children's Health Network HREC (Coordinating HREC & Women's and Children's Hospital,  
34  
35 Adelaide; Southern Adelaide Clinical HREC, Adelaide, South Australia); Mercy Health HREC  
36  
37 (Werribee Mercy Hospital, Werribee, Victoria); Mater Mothers' Hospital, Brisbane,  
38  
39 Queensland), University of Notradame, Joondalup Health Campus, Joondalup, Western  
40  
41 Australia. Any subsequent modifications will be reviewed and approved by the HREC and  
42  
43 governance of each study site. The study will be conducted in compliance with the current  
44  
45 approved version of the protocol. Any change to the protocol document or informed consent  
46  
47 form that affects the scientific intent, study design, patient safety, or may affect a participant's  
48  
49 willingness to continue participation in the study will be considered a major amendment. All  
50  
51 such amendments will be submitted to the HREC for approval. Any other changes to the  
52  
53 protocol (such as administrative changes to dates and study personnel) will be considered  
54  
55 minor amendments and will be notified to the HREC as appropriate.  
56  
57  
58  
59  
60

## Confidentiality

Participant confidentiality is strictly held in trust by the participating investigators, research staff and their agents. This confidentiality is extended to cover testing of biological samples in addition to the clinical information relating to participants. The study protocol, documentation, data and all other information generated will be held in strict confidence. No information concerning the study or the data will be released to any unauthorised third party, without prior written approval of the Coordinating Centre. The Coordinating Centre and regulatory authorities may inspect all documents and records required to be maintained by the Investigator, including but not limited to, medical records and pharmacy records for the infants in this study subject to individuals having obtained approval/clearance through State/National Governments and HREC as required by local laws. The study site will permit access to such records. Clinical information will not be released without written permission of the parent/guardian, except as necessary for monitoring by HREC or regulatory agencies.

## Dissemination plan

Study findings will be submitted for peer-reviewed publication and for presentation at appropriate local and international conferences. In addition, study findings will be disseminated to participants through a one-page lay summary. Results will be made available to the wider community through social media avenues and the South Australian Health & Medical Research Institute website.

## Trial status

This enrolment phase of this trial completed on 27<sup>th</sup> April 2017 with successful attainment of sample size (n=5544). Completion of study follow up appointments and collection of labour and birth data from participant medical records will be completed by December 2017.

## Acknowledgements

1  
2  
3  
4  
5  
6  
7  
8  
9  
10  
11  
12  
13  
14  
15  
16  
17  
18  
19  
20  
21  
22  
23  
24  
25  
26  
27  
28  
29  
30  
31  
32  
33  
34  
35  
36  
37  
38  
39  
40  
41  
42  
43  
44  
45  
46  
47  
48  
49  
50  
51  
52  
53  
54  
55  
56  
57  
58  
59  
60

We thank the research and clinical teams at all participating study centres.

For peer review only

### Authors' contributions

MM, JQ, RAG, AJM and SJZ conceived and designed the study with KPB contributing to ongoing study implementation and management. LY provided statistical expertise. SJZ and KPB wrote the first draft of the manuscript. All authors contributed to refinement of the study protocol and approved the final manuscript.

### Funding statement

This work was supported by the National Health and Medical Research Council (NHMRC) of Australia, grant number 1050468. The Study product is donated by Efamol Ltd/Wassen Intl. Ltd. An NHMRC Fellowship supports RAG (Senior Principal Research Fellow 1046207) and MM (Principal Research Fellow 1061704) and LNY (Early Career Research Fellow 1052388). The funding bodies had no role in the design of this study and will not have any role during the conduct of the study, data collection, study management, analyses and interpretation of the data or in the writing, review or approval publications. The contents of the published material are solely the responsibility of the authors and do not reflect the views of the NHMRC.

### Competing Interests

The authors declare: financial support for the submitted work from the National Health and Medical Research Council (NHMRC) Australia (Project Grant 1050468). RAG serves on a scientific advisory board for Fonterra; MM serves on scientific advisory boards for Nestle and Fonterra. Associated Honoraria for RAG and MM are paid to their institutions to support conference travel and continuing education for postgraduate students and early career researchers. The authors declare that they have no competing interests.

**Additional authors and members of the ORIP Investigative Team**

The following are members of the ORIP (Omega-3 fatty acids to Reduce the Incidence of Preterm birth) Investigative team: Gus Dekker (Northern Adelaide Health Service [Lyell McEwin Hospital and Modbury Hospital], Adelaide, South Australia. Elinor Atkinson (Flinders Medical Centre, Adelaide, South Australia), Jodie Dodd (Women's and Children's Hospital, Adelaide, South Australia), Jacqueline van Dam & Nisha Khot (Mercy Hospital, Werribee, Melbourne, Victoria), Huda Safa (Mater Mothers' Hospital, Brisbane, Queensland).

## References

1. Thornton S. Preterm Birth: Causes, Consequences and Prevention. *The Obstetrician & Gynaecologist* 2008;10(4):280-80.
2. Lumley J. Defining the problem: the epidemiology of preterm birth. *BJOG: An International Journal of Obstetrics & Gynaecology* 2003;110(s20):3-7.
3. Martin JA, Hamilton BE, Sutton PD, et al. Births: final data for 2004. *Natl Vital Stat Rep* 2006;55(1):1-101. [published Online First: 2006/10/21]
4. Pretorius C, Jagatt A, Lamont RF. The relationship between periodontal disease, bacterial vaginosis, and preterm birth. *Journal of perinatal medicine* 2007;35(2):93-99.
5. Gravett MG. Causes of preterm delivery. *Semin Perinatol* 1984
6. Karim SM. The role of prostaglandins in human parturition. *Proceedings of the Royal Society of Medicine* 1971;64(1):10-2. [published Online First: 1971/01/01]
7. Brazle AE, Johnson BJ, Webel SK, et al. Omega-3 fatty acids in the gravid pig uterus as affected by maternal supplementation with omega-3 fatty acids. *Journal of Animal Science* 2009;87(3):994-1002. doi: 10.2527/jas.2007-0626
8. Prescott SL. Early-life environmental determinants of allergic diseases and the wider pandemic of inflammatory noncommunicable diseases. *Journal of allergy and clinical immunology* 2013;131(1):23-30.
9. Meyer BJ, Mann NJ, Lewis JL, et al. Dietary intakes and food sources of omega-6 and omega-3 polyunsaturated fatty acids. *Lipids* 2003;38(4):391-8.
10. Oken E, Kleinman KP, Berland WE, et al. Decline in fish consumption among pregnant women after a national mercury advisory. *Obstet Gynecol* 2003;102(2):346-51. doi: S0029784403004848 [pii] [published Online First: 2003/08/09]



- 1  
2  
3  
4  
5  
6  
7  
8  
9  
10  
11  
12  
13  
14  
15  
16  
17  
18  
19  
20  
21  
22  
23  
24  
25  
26  
27  
28  
29  
30  
31  
32  
33  
34  
35  
36  
37  
38  
39  
40  
41  
42  
43  
44  
45  
46  
47  
48  
49  
50  
51  
52  
53  
54  
55  
56  
57  
58  
59  
60
11. Escamilla-Nuñez MC, Barraza-Villarreal A, Hernández-Cadena L, et al. Omega-3 fatty acid supplementation during pregnancy and respiratory symptoms in children. *CHEST Journal* 2014;146(2):373-82.
  12. Bulstra-Ramakers MT, Huisjes HJ, Visser GH. The effects of 3g eicosapentaenoic acid daily on recurrence of intrauterine growth retardation and pregnancy induced hypertension. *Br J Obstet Gynaecol* 1995;102(2):123-6. [published Online First: 1995/02/01]
  13. Olsen SF, Secher NJ, Tabor A, et al. Randomised clinical trials of fish oil supplementation in high risk pregnancies. Fish Oil Trials In Pregnancy (FOTIP) Team. *BJOG : an international journal of obstetrics and gynaecology* 2000;107(3):382-95. [published Online First: 2000/03/31]
  14. Horvath A, Koletzko B, Szajewska H. Effect of supplementation of women in high-risk pregnancies with long-chain polyunsaturated fatty acids on pregnancy outcomes and growth measures at birth: a meta-analysis of randomized controlled trials. *British Journal of Nutrition* 2007;98(02):253-59.
  15. Szajewska H, Horvath A, Koletzko B. Effect of n-3 long-chain polyunsaturated fatty acid supplementation of women with low-risk pregnancies on pregnancy outcomes and growth measures at birth: a meta-analysis of randomized controlled trials. *Am J Clin Nutr* 2006;83(6):1337-44.
  16. Makrides M, Gibson RA, McPhee AJ, et al. Effect of DHA supplementation during pregnancy on maternal depression and neurodevelopment of young children: a randomized controlled trial. *Jama* 2010;304(15):1675-83. doi: 10.1001/jama.2010.1507
  17. Carlson SE, Colombo J, Gajewski BJ, et al. DHA supplementation and pregnancy outcomes. *The American Journal of Clinical Nutrition* 2013;97(4):808-15. doi: 10.3945/ajcn.112.050021

- 1  
2  
3  
4  
5  
6  
7  
8  
9  
10  
11  
12  
13  
14  
15  
16  
17  
18  
19  
20  
21  
22  
23  
24  
25  
26  
27  
28  
29  
30  
31  
32  
33  
34  
35  
36  
37  
38  
39  
40  
41  
42  
43  
44  
45  
46  
47  
48  
49  
50  
51  
52  
53  
54  
55  
56  
57  
58  
59  
60
18. Makrides M, Duley L, Olsen SF. Marine oil, and other prostaglandin precursor, supplementation for pregnancy uncomplicated by pre-eclampsia or intrauterine growth restriction. *Cochrane Database Syst Rev* 2006;3
19. Philippa Middleton JG, Emily Shepherd, Maria Makrides. Omega-3 supplementation during pregnancy: an updated Cochrane review. *J Paediatr Child Health* 2017;53:68-69. doi: 10.1111/jpc.13494\_201
20. Australian and New Zealand Neonatal Network A. Australian and New Zealand Network Data Dictionary, Definitions for audit. Australian and New Zealand Network Data Dictionary. Australia, 2012/2013.
21. Moher D, Schulz KF, Altman DG. The CONSORT statement: revised recommendations for improving the quality of reports of parallel group randomized trials. *BMC Medical Research Methodology* 2001;1(1):2.
22. Governance R. Site Specific Assessment: Submission Guidelines: Women's and Children's Health Network RG, ed. Site Specific Assessment: Submission Guidelines. Adelaide: Women's and Children's Health Network, 2016.

Figure 1. Flow chart for determining estimated date of delivery (EDD)

LMP, last menstrual period; GA, gestational age; U/S ultrasound; w, weeks

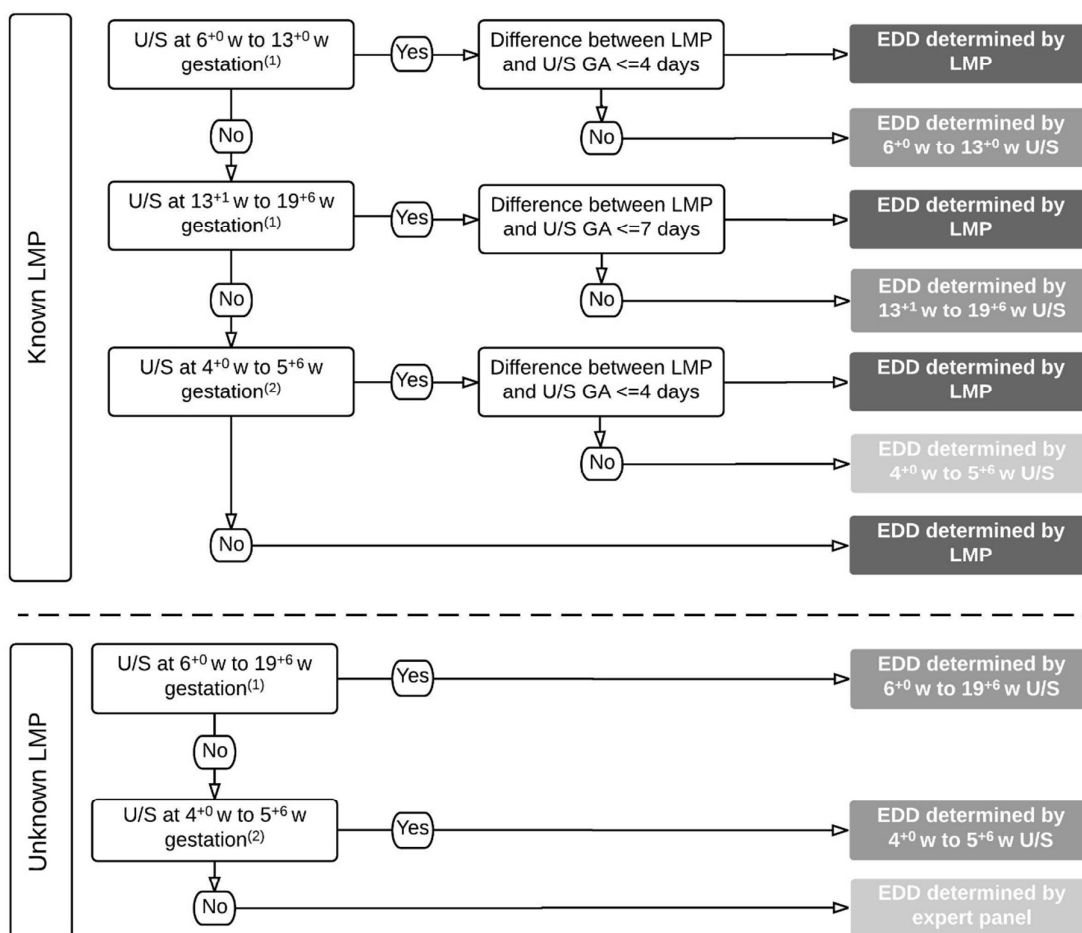

(1) Where multiple ultrasounds are performed within a given GA range, the earliest ultrasound will be used to determine gestational age.

(2) Where multiple ultrasounds are performed within a given GA range, the latest ultrasound will be used to determine gestational age.

Figure 2. ORIP Trial Schedule

\*\* $-t_1$  = <20 weeks' gestation;  $t_1$  = 2 weeks' post randomization and allocation;  $t_2$  = 28 weeks' gestation;  $t_3$  = 34 weeks' gestation or birth, whichever occurs first;  $t_x$  = 6 weeks post estimated due date.

|                                                                         | Enrolment | Allocation | Post-allocation |       |       | Completion |
|-------------------------------------------------------------------------|-----------|------------|-----------------|-------|-------|------------|
| TIMEPOINT**                                                             | $-t_1$    | 0          | $t_1$           | $t_2$ | $t_3$ | $t_x$      |
| <b>ENROLMENT:</b>                                                       |           |            |                 |       |       |            |
| Eligibility screening                                                   | X         |            |                 |       |       |            |
| Informed consent                                                        | X         |            |                 |       |       |            |
| Randomisation                                                           | X         |            |                 |       |       |            |
| Allocation                                                              |           | X          |                 |       |       |            |
| <b>INTERVENTION:</b>                                                    |           |            |                 |       |       |            |
| <i>Treatment: 3x500mg capsules <math>\omega</math>-3 LCPUFA per day</i> |           |            |                 |       |       |            |
| <i>OR</i>                                                               |           |            |                 |       |       |            |
| <i>Control: 3x500mg capsules blended vegetable oils</i>                 |           |            |                 |       |       |            |
| <b>ASSESSMENTS:</b>                                                     |           |            |                 |       |       |            |
| <i>Fatty Acid Analysis (finger prick)</i>                               | X         |            |                 |       | X     |            |
| <i>Maternal clinical &amp; demographic details</i>                      | X         |            |                 |       |       |            |
| <i>Compliance &amp; side effects</i>                                    |           |            | X               | X     | X     |            |
| <i>Labour &amp; birth data extracted from medical records</i>           |           |            |                 |       |       | X          |

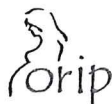

ORIP STATISTICAL ANALYSIS PLAN  
CONFIDENTIAL

Study Name: ORIP  
NHMRC ID: APP 1050468  
SAP Authors: Kara Cashman (Trial Statistician)  
Lan Kelly (Trial Statistician)  
Lisa Yelland (Statistical Investigator)

SAP Version: 11  
SAP Date: 29/05/2017

Approved by ORIP Trial Steering Committee:

|    |                |                                                                                     |             |                 |
|----|----------------|-------------------------------------------------------------------------------------|-------------|-----------------|
| 28 | Maria Makrides |   | Version: 11 | Date: 7/6/2017  |
| 30 | Jo Zhou        |  | Version: 11 | Date: 1.6.2017  |
| 32 | Andrew McPhee  |  | Version: 11 | Date: 1.6.2017  |
| 34 | Lisa Yelland   |  | Version: 11 | Date: 15.6.2017 |
| 36 | Robert Gibson  |  | Version: 11 | Date: 8/6/17    |
| 38 | Karen Best     |  | Version: 11 | Date: 1.6.2017  |

## Contents

|    |                                                              |    |
|----|--------------------------------------------------------------|----|
| 1  | PREFACE.....                                                 | 6  |
| 2  | PURPOSE OF SAP .....                                         | 6  |
| 3  | STUDY OBJECTIVES AND OUTCOMES .....                          | 6  |
| 4  | 3.1 Study Objectives.....                                    | 6  |
| 5  | 3.2 Outcome Variables.....                                   | 6  |
| 6  | STUDY METHODS.....                                           | 6  |
| 7  | 4.1 Overall Study Design and Plan .....                      | 6  |
| 8  | 4.2 Selection of Study Population .....                      | 6  |
| 9  | 4.2.1 Inclusion Criteria .....                               | 6  |
| 10 | 4.2.2 Exclusion Criteria.....                                | 6  |
| 11 | 4.3 Method of Treatment Assignment and Randomisation .....   | 7  |
| 12 | 4.4 Treatment Masking (Blinding).....                        | 7  |
| 13 | 4.5 Sample Size.....                                         | 7  |
| 14 | SEQUENCE OF PLANNED ANALYSES .....                           | 8  |
| 15 | 5.1 Interim Analysis.....                                    | 8  |
| 16 | 5.2 Final Analyses and Reporting .....                       | 8  |
| 17 | GENERAL ISSUES FOR STATISTICAL ANALYSIS .....                | 8  |
| 18 | 6.1 Analysis Software .....                                  | 8  |
| 19 | 6.2 Analysis Approach .....                                  | 8  |
| 20 | 6.3 Methods for Withdrawals, Missing Data and Outliers ..... | 8  |
| 21 | 6.4 Protocol Violations and Deviations .....                 | 9  |
| 22 | 6.5 Data Transformations.....                                | 10 |
| 23 | 6.6 Covariates for Adjustment .....                          | 10 |
| 24 | 6.7 Planned Treatment by Covariate Interactions .....        | 10 |
| 25 | 6.8 Multiple Comparisons and Multiplicity.....               | 11 |
| 26 | 6.9 Clustering .....                                         | 11 |
| 27 | DESCRIPTIVE STATISTICS.....                                  | 12 |
| 28 | 7.1 Flow Chart of Participants.....                          | 12 |
| 29 | 7.2 Randomisation Errors.....                                | 12 |
| 30 | 7.3 Baseline Characteristics .....                           | 12 |
| 31 | 7.4 Missing Data.....                                        | 12 |

|    |        |                                                                             |
|----|--------|-----------------------------------------------------------------------------|
| 1  |        |                                                                             |
| 2  |        |                                                                             |
| 3  |        |                                                                             |
| 4  |        |                                                                             |
| 5  | 8      | STATISTICAL ANALYSES..... 12                                                |
| 6  | 8.1    | Gestational Age Definition ..... 13                                         |
| 7  | 8.2    | Primary Outcome Variable (EPTB) ..... 14                                    |
| 8  | 8.3    | Secondary Pregnancy Outcome Variables ..... 15                              |
| 9  |        |                                                                             |
| 10 | 8.3.1  | Preterm birth ..... 15                                                      |
| 11 | 8.3.2  | Early Preterm Spontaneous Labour ..... 15                                   |
| 12 | 8.3.3  | Preterm Spontaneous Labour ..... 15                                         |
| 13 | 8.3.4  | Gestational Age at Birth ..... 15                                           |
| 14 | 8.3.5  | Gestational Age at Birth (Censored) ..... 15                                |
| 15 | 8.3.6  | Pre Labour Premature Rupture of Membranes ..... 16                          |
| 16 | 8.3.7  | Pre Labour Preterm Premature Rupture of Membranes ..... 16                  |
| 17 | 8.3.8  | Post-term Induction ..... 16                                                |
| 18 | 8.3.9  | Clinical diagnosis of Post-term Induction ..... 17                          |
| 19 | 8.3.10 | Post-term Pre Labour Caesarean Section ..... 17                             |
| 20 | 8.3.11 | Clinical diagnosis of Post-term Pre Labour Caesarean Section ..... 17       |
| 21 | 8.3.12 | Post-term Induction or Post-term Pre Labour Caesarean Section ..... 17      |
| 22 | 8.3.13 | Clinical diagnosis of Post-term Induction or Post-term Pre Labour Caesarean |
| 23 |        | Section 18                                                                  |
| 24 | 8.3.14 | Prolonged Gestation ..... 18                                                |
| 25 | 8.3.15 | Caesarean Section ..... 18                                                  |
| 26 | 8.3.16 | Gestational Diabetes Definition 1 ..... 18                                  |
| 27 | 8.3.17 | Gestational Diabetes Definition 2 ..... 19                                  |
| 28 | 8.3.18 | Clinical Diagnosis of Gestational Diabetes ..... 19                         |
| 29 | 8.3.19 | Pregnancy Induced Hypertension ..... 19                                     |
| 30 | 8.3.20 | Pre-Eclampsia ..... 20                                                      |
| 31 | 8.3.21 | Clinical Diagnosis of Pre-Eclampsia ..... 20                                |
| 32 | 8.3.22 | Eclampsia ..... 20                                                          |
| 33 | 8.3.23 | Postpartum Haemorrhage ..... 20                                             |
| 34 | 8.3.24 | Estimated Blood Loss at Birth ..... 20                                      |
| 35 | 8.3.25 | Maternal Serious Adverse Events ..... 21                                    |
| 36 | 8.3.26 | Length of Hospital Stay (Mother) ..... 21                                   |
| 37 | 8.3.27 | Maternal Use of Antibiotics ..... 21                                        |
| 38 |        |                                                                             |
| 39 |        |                                                                             |
| 40 |        |                                                                             |
| 41 |        |                                                                             |
| 42 |        |                                                                             |
| 43 |        |                                                                             |
| 44 |        |                                                                             |
| 45 |        |                                                                             |
| 46 |        |                                                                             |
| 47 |        |                                                                             |
| 48 |        |                                                                             |
| 49 |        |                                                                             |
| 50 |        |                                                                             |
| 51 |        |                                                                             |
| 52 |        |                                                                             |
| 53 |        |                                                                             |
| 54 |        |                                                                             |
| 55 |        |                                                                             |
| 56 |        |                                                                             |
| 57 |        |                                                                             |
| 58 |        |                                                                             |
| 59 |        |                                                                             |
| 60 |        |                                                                             |

|    |        |                                                              |
|----|--------|--------------------------------------------------------------|
| 1  |        |                                                              |
| 2  |        |                                                              |
| 3  |        |                                                              |
| 4  | 8.4    | Safety and Tolerability of DHA Supplementation ..... 21      |
| 5  |        |                                                              |
| 6  | 8.5    | Secondary Neonatal Outcome Variables ..... 22                |
| 7  |        |                                                              |
| 8  | 8.5.1  | Low Birth Weight ..... 22                                    |
| 9  |        |                                                              |
| 10 | 8.5.2  | Very Low Birth Weight..... 22                                |
| 11 |        |                                                              |
| 12 | 8.5.3  | Very Small for Gestational Age ..... 22                      |
| 13 |        |                                                              |
| 14 | 8.5.4  | Small for Gestational Age ..... 22                           |
| 15 |        |                                                              |
| 16 | 8.5.5  | High Birth Weight..... 23                                    |
| 17 |        |                                                              |
| 18 | 8.5.6  | Large for Gestational Age ..... 23                           |
| 19 |        |                                                              |
| 20 | 8.5.7  | Very Large for Gestational Age ..... 23                      |
| 21 |        |                                                              |
| 22 | 8.5.8  | Birth Anthropometrics ..... 23                               |
| 23 |        |                                                              |
| 24 | 8.5.9  | Neonatal Complications..... 24                               |
| 25 |        |                                                              |
| 26 | 8.5.10 | Duration of Supplemental Oxygen ..... 24                     |
| 27 |        |                                                              |
| 28 | 8.5.11 | Infant Serious Adverse Event..... 24                         |
| 29 |        |                                                              |
| 30 | 8.5.12 | Admission to Neonatal Intensive Care..... 25                 |
| 31 |        |                                                              |
| 32 | 8.5.13 | Length of Stay in Neonatal Intensive Care Unit..... 25       |
| 33 |        |                                                              |
| 34 | 8.5.14 | Length of Hospital Stay (Infant) ..... 25                    |
| 35 | 8.6    | Secondary Outcome Variables Related to Trial Quality..... 25 |
| 36 |        |                                                              |
| 37 | 8.6.1  | Correctly Guessed Treatment Assignment ..... 26              |
| 38 |        |                                                              |
| 39 | 8.6.2  | Number of Capsules Missed ..... 26                           |
| 40 |        |                                                              |
| 41 | 8.6.3  | Number of Unused Capsules ..... 26                           |
| 42 |        |                                                              |
| 43 | 8.6.4  | Treatment Cessation..... 26                                  |
| 44 |        |                                                              |
| 45 | 8.6.5  | Blood Fatty Acid Concentrations ..... 27                     |
| 46 |        |                                                              |
| 47 | 8.6.6  | Use of Dietary Supplements ..... 27                          |
| 48 | 9      | REFERENCES..... 27                                           |
| 49 |        |                                                              |
| 50 |        |                                                              |
| 51 |        |                                                              |
| 52 |        |                                                              |
| 53 |        |                                                              |
| 54 |        |                                                              |
| 55 |        |                                                              |
| 56 |        |                                                              |
| 57 |        |                                                              |
| 58 |        |                                                              |
| 59 |        |                                                              |
| 60 |        |                                                              |



ORIP Statistical Analysis Plan

## ABBREVIATIONS

| <b>Abbreviation</b> | <b>Definition</b>                                   |
|---------------------|-----------------------------------------------------|
| BP                  | Blood Pressure                                      |
| CRF                 | Case Report Form                                    |
| DHA                 | Docosahexaenoic Acid                                |
| EDD                 | Established Date of Delivery                        |
| EPA                 | Eicosapentaenoic Acid                               |
| EPTB                | Early Preterm Birth                                 |
| GA                  | Gestational Age                                     |
| GEE                 | Generalised Estimating Equation                     |
| LCPUFA              | Long Chain Polyunsaturated Fatty Acid               |
| LMP                 | Last Menstrual Period                               |
| MIS                 | Management Information System                       |
| NICU                | Neonatal Intensive Care Unit                        |
| ORIP                | Omega-3 fats to Reduce the Incidence of Prematurity |
| SAP                 | Statistical Analysis Plan                           |
| U/S                 | Ultrasound                                          |

## 1 PREFACE

This Statistical Analysis Plan (SAP) describes the planned analyses and reporting for the Omega-3 fats to Reduce the Incidence of Prematurity (ORIP) trial.

The following documents were reviewed in preparation of this SAP:

- ORIP NHMRC Grant Application (ID APP1050468\_Zhou)
- ORIP Trial Protocol (Version 4, 14 September 2015)
- ORIP Case Report Form (CRF) (Version 1, 10 December 2013)
- ORIP ANZCTR Registration Page ([www.anzctr.org.au](http://www.anzctr.org.au), ACTRN 12613001142729)

## 2 PURPOSE OF SAP

The purpose of this SAP is to outline the planned analyses to be conducted to support the completion of the final report for the ORIP trial. The planned analyses and reporting for any side studies or follow up studies of the trial are not covered by this SAP.

## 3 STUDY OBJECTIVES AND OUTCOMES

### 3.1 Study Objectives

The primary objective of the trial is to determine the effect of supplementing the diets of pregnant women with omega-3 long chain polyunsaturated fatty acids (LCPUFA) on the incidence of early preterm birth (EPTB), defined as gestation at birth <34 completed weeks.

### 3.2 Outcome Variables

The primary outcome variable is the incidence of EPTB, defined as delivery before 34 completed weeks gestation. Gestational age is determined using a combination of maternal menstrual dating and ultrasound dating. The primary and secondary outcome variables are described in detail in Section 8.

## 4 STUDY METHODS

### 4.1 Overall Study Design and Plan

Randomised controlled double-blind multicentre trial.

### 4.2 Selection of Study Population

#### 4.2.1 Inclusion Criteria

- Women with a singleton or multiple pregnancy and less than 20 weeks gestation.
- Women who are able to give informed consent.

#### 4.2.2 Exclusion Criteria

- Women with a known fetal abnormality.
- Women who are taking dietary supplements containing LCPUFA > 150mg/day.
- Women who are taking dietary supplements containing LCPUFA ≤ 150mg/day and are not willing to stop.
- Women with bleeding disorders where fish oil is contraindicated or are on anticoagulant therapy.
- Women with a history of drug or alcohol abuse.

#### 4.3 Method of Treatment Assignment and Randomisation

Women are randomly assigned to receive DHA capsules (treatment) or vegetable oil capsules (control) in the ratio 1:1 using a web-based randomisation service. The randomisation is stratified by centre and dietary supplement use (as defined in the table below) and uses randomly permuted blocks of size four and six in the ratio 1:1. The randomisation schedule was produced by an independent statistician using ralloc.ado version 3.7.5 in Stata version 12.1.

| Stratification Variable                                                                 | Categories                                                                                                                                                                                                                                                                    |
|-----------------------------------------------------------------------------------------|-------------------------------------------------------------------------------------------------------------------------------------------------------------------------------------------------------------------------------------------------------------------------------|
| Centre                                                                                  | Women's & Children's Hospital, South Australia<br>Flinders Medical Centre, South Australia<br>Joondalup Health Service, Western Australia<br>Werribee Mercy Hospital, Victoria<br>Brisbane Mater Mothers Hospital, Queensland<br>Lyell McEwin Health Service, South Australia |
| Use of dietary supplements containing n-3 LCPUFA in the 3 months prior to randomisation | Yes<br>No                                                                                                                                                                                                                                                                     |

#### 4.4 Treatment Masking (Blinding)

Participants, clinicians and research staff are blinded to treatment group allocation. Active and placebo capsules are identical in size, shape and colour.

#### 4.5 Sample Size

In our DOMInO trial (Makrides et al 2010) of women with singleton pregnancies, treatment resulted in a 1.16% absolute reduction (from 2.25% to 1.09%) in the incidence of EPTB. This reduction occurred in the presence of non-adherence resulting from women assigned to the intervention failing to take the trial supplements as directed and control women taking prenatal supplements containing low dose omega-3 LCPUFA. Similar levels of non-adherence are expected in the proposed ORIP trial. Inclusion of women with multiple pregnancies in the ORIP trial is expected to result in a small increase in the incidence of EPTB in both treatment groups, since EPTB is more common in multiple pregnancies. To demonstrate an absolute reduction in the incidence of EPTB of 1.16% (from 2.45% to 1.29%) with 85% power and two-sided alpha=0.049 at the final analysis, a sample size of

2631 per group (i.e. 5262 total) is required. Allowing for a loss to follow up of 5%, we need to enrol a total of 5540 women into the trial to ensure adequate power for the primary outcome. Since EPTB is a mother level outcome, the sample size calculations define the number of mothers that need to be recruited and no adjustment for clustering due to multiple pregnancies is required for this outcome. The sample size has not been inflated to account for mothers who take part in the trial multiple times for different pregnancies, since independent randomisations will be performed for each pregnancy and hence a design effect of approximately 1 is expected (Yelland et al 2017).

## 5 SEQUENCE OF PLANNED ANALYSES

### 5.1 Interim Analysis

An interim analysis of the primary outcome will be conducted by an independent statistician once data collection has been completed for the first 2770 (50%) randomised participants, based on the target sample size for the trial of 5540. The analysis will be performed using the method described in Section 8.2.

### 5.2 Final Analyses and Reporting

Once data collection and cleaning is complete, and the final version of this SAP has been approved, blinded treatment codes will be included in the database and analysis of the listed outcomes will be performed blinded to treatment group. The blinding will be broken following analysis of these outcomes. Results of the statistical analyses will be made available to the Chief Investigators.

Any post-hoc, exploratory analyses which were not identified in this SAP but are completed to support the planned study analyses listed in this SAP will be clearly identified. Any deviations from the planned analyses detailed in this SAP will be clearly documented with reasons in a post-analysis version of the SAP.

## 6 GENERAL ISSUES FOR STATISTICAL ANALYSIS

### 6.1 Analysis Software

All analyses will be performed using SAS<sup>®</sup> Software version 9.3 or later (SAS Institute Inc., Cary, NC, USA).

### 6.2 Analysis Approach

The planned analyses will be performed using an intention-to-treat approach; randomised participants will be analysed according to the treatment they were randomised to receive. A secondary per protocol analysis will be performed for the primary outcome only.

### 6.3 Methods for Withdrawals, Missing Data and Outliers

Data collected on participants up until the point of withdrawal will be included in the analysis. No data will be collected after the point of withdrawal. Participants who cease treatment and do not wish to be contacted for follow up, but who give consent to access their medical records, will be considered non compliant. Data collected up until the point they became non compliant and additional data obtained from their medical records will be included in the analysis.

Multiple imputation will be used to create 100 complete datasets for analysis. Use of 100 imputations ensures that the loss of power compared to full information maximum likelihood methods is <1%, even when the fraction of missing information is high (Graham et al., 2007). Imputation will be performed separately by treatment group using the fully conditional specification method (also known as chained equations). Imputation models will include a range of variables, including baseline characteristics and auxiliary variables measured after randomisation. For each outcome, covariates pre-specified for adjustment in the analysis model or for conducting subgroup analyses (see Sections 6.6, 6.7) will be included in the imputation model. Analyses will be performed on both the raw and imputed data, with conclusions to be drawn based on the results of the analyses performed on the imputed data.

The imputed analysis will be performed under a missing at random assumption. This assumption will be made plausible by identifying variables that predict missingness and including these in the imputation model. For the primary outcome, the sensitivity of results to the missing at random assumption will be investigated by assuming that data are missing not at random in the imputation model. Using pattern mixture models, the odds of EPTB will be assumed to be between half and twice as high in women with missing data compared to women with observed data. These differences will be applied to control group women only, treatment group women only and women in both treatment groups.

Participants who have a miscarriage or termination prior to 20 weeks gestation will be excluded from all analyses, except where this is a specified outcome, including descriptive statistics, outcomes relevant to prior to 20 weeks and safety data. Participants who have a stillbirth or termination at or after 20 weeks gestation will be excluded from analyses of neonatal outcomes, except birth anthropometrics and birth weight outcomes. These participants will not have data imputed, since outcomes are undefined rather than missing in this case. Further, the goal of the analysis is to assess the effect of treatment in survivors, rather than a hypothetical immortal setting. All other randomised participants will be included in the imputed analysis. If there is any evidence to suggest that miscarriage, termination and/or stillbirth is influenced by treatment group ( $p < 0.2$ ), the principal strata effect (i.e. the effect of treatment in the subgroup of women who would not have had a miscarriage, termination or stillbirth under either treatment) will be explored using the sensitivity analysis approach of Chiba and VanderWeele (2011).

Outliers will be queried during data collection and the statistical analysis. Unless confirmed as a data entry error through verification of the CRF or other sources of data as appropriate, outliers will not be excluded from the primary analysis.

#### 6.4 Protocol Violations and Deviations

No participants will be excluded from the intention-to-treat analyses due to protocol

1  
2  
3  
4  
5  
6  
7  
8  
9  
10  
11  
12  
13  
14  
15  
16  
17  
18  
19  
20  
21  
22  
23  
24  
25  
26  
27  
28  
29  
30  
31  
32  
33  
34  
35  
36  
37  
38  
39  
40  
41  
42  
43  
44  
45  
46  
47  
48  
49  
50  
51  
52  
53  
54  
55  
56  
57  
58  
59  
60

deviations. Only women who were compliant with the protocol will be included in the per protocol analysis for the primary outcome. Two separate definitions of compliance will be used. First, women will be considered compliant if they returned their remaining capsules at the end of the trial and consumed at least 75% of the number of capsules expected to be consumed. We will assume women consumed the number of capsules issued [total number of bottles dispensed (CRF reference A.6) x 90 (number of capsules per bottle)] minus the number returned (F.6), and calculate the number of capsules expected to be consumed as  $[3 \times (\min(\text{date at 34 weeks based on GA as defined in Section 8.1, CRF reference J.5 date of birth}) - \text{CRF reference A1.1 consent date})]$ . Second, women will be considered compliant if they had the 28 week telephone contact and reported they had missed none, 1-3 or 4-6 capsules in the last week out of the recommended 21 capsules (CRF reference E.3).

### 6.5 Data Transformations

No data transformations are planned. The statistical analyses detailed in Section 8 are based on assumptions about the distribution of the outcomes. Should these assumptions turn out to be invalid, appropriate data transformations may be required. Data transformations are not planned to correct for departures from normality, since the sample size is sufficient for the central limit theorem to apply (Lumley et al., 2002).

### 6.6 Covariates for Adjustment

For each outcome, both unadjusted and adjusted analyses will be performed. The adjusted results will be used to draw conclusions about the effect of treatment on the outcomes of interest, with unadjusted analyses performed for completeness and to potentially confirm the results of the adjusted analyses.

The Committee for Proprietary Medicinal Products (CPMP, 2004) state that stratification variables should generally be adjusted for in the primary analysis, regardless of their effect on the outcome. It has been shown that stratification leads to positive correlation between treatment groups and failure to adjust for stratification variables in the analysis biases standard error estimates for the treatment effect upwards (Kahan and Morris, 2012). We will therefore adjust for stratification variables (as defined in Section 4.3) and draw conclusions about the effect of treatment based on the adjusted analyses. No adjustment is planned for any other baseline variables, apart from the stratification variables. If convergence is an issue, some of the stratification variables may need to be collapsed or excluded from the adjusted analysis. Any deviation from the planned analyses will be clearly identified.

### 6.7 Planned Treatment by Covariate Interactions

Statistical analysis of the primary outcome of EPTB and all secondary outcome variables listed in Section 8 will be performed to determine the effect of treatment on the outcome (see Section 8 for details).

For the primary outcome of EPTB and the related secondary outcomes listed below, secondary analyses will also be performed.

- Post-term induction
- Clinical diagnosis of post-term induction
- Post-term prelabour caesarean delivery
- Clinical diagnosis of post-term prelabour caesarean delivery

- Post-term induction or post-term prelabour caesarean delivery
- Clinical diagnosis of post-term induction or post-term prelabour caesarean delivery
- Preterm birth
- Early preterm spontaneous labour
- Preterm spontaneous labour
- Gestational age at birth
- Gestational age at birth (censored)
- Low birth weight
- Very low birth weight
- Small for gestational age
- Very small for gestational age
- High birth weight
- Large for gestational age
- Very large for gestational age
- Birth weight, raw and z score
- Birth length, raw and z score
- Birth head circumference, raw and z score
- Admission to neonatal intensive care unit
- Perinatal death

The secondary analyses will test for evidence of effect modification by pregnancy status (singleton vs multiple), history of preterm birth (yes vs no) and baseline DHA (split into quartiles). This will be achieved by including a main effect term for the effect modifier of interest and a treatment by effect modifier interaction term in the model. Separate estimates of treatment effect will be obtained for singleton and multiple pregnancies, history of preterm birth or not, and DHA quartiles, independent of whether the interaction term is statistically significant, since these subgroups are of interest a priori. Any additional unplanned treatment by covariate interactions must be considered exploratory and will be clearly identified in the final report.

### 6.8 Multiple Comparisons and Multiplicity

Multiple hypothesis tests will need to be performed to assess the effectiveness of omega-3 dietary supplementation due to multiple secondary outcomes (including key and other secondary outcomes), unadjusted and adjusted analyses, and analyses based on raw and imputed data. No adjustment will be made for the number of secondary analyses performed as these analyses are of less importance and less emphasis will be placed on the results. Since conclusions will be drawn based on the adjusted results using the imputed data, no adjustment will be made for the fact that both unadjusted and adjusted analyses are being performed on both raw and imputed data sets for each outcome.

### 6.9 Clustering

Some women in the trial will have a multiple pregnancy and some women will take part in the trial multiple times for different pregnancies. For all outcomes, clustering due to mother will be taken into account in the analysis using generalised estimating equations (GEEs) with an independence working correlation structure, unless otherwise specified.

## 7 DESCRIPTIVE STATISTICS

### 7.1 Flow Chart of Participants

Information will be presented by treatment group (where appropriate) on:

- The number of women screened for ORIP.
- The number of women eligible for participation in ORIP.
- The number of women not eligible for participation in ORIP by reason.
- The number of women who gave informed consent.
- The number of women who did not give informed consent by reason.
- The number of women randomised into the ORIP trial.
- The number of women who withdrew and did not give consent to access their medical records.
- The number of women who were non compliant (stopped taking treatment and requested no further contact but gave consent to access their medical records).
- The number of women who had a miscarriage or termination prior to 20 weeks gestation.
- The number of women who had a still birth or termination at or after 20 weeks gestation.
- The number of women with primary outcome data available.

### 7.2 Randomisation Errors

Information will be presented by treatment group on:

- The number of women randomised in the wrong stratum.
- The number of women given the wrong treatment.
- The number of women discovered to be ineligible after randomisation.
- The number of women randomised multiple times in error.

### 7.3 Baseline Characteristics

A descriptive comparison of the randomised groups will be conducted on the baseline characteristics collected in sections A, B and C of the CRF. Means and standard deviations, or medians and interquartile ranges will be reported for continuous variables. Frequencies and percentages will be reported for categorical variables.

### 7.4 Missing Data

Missing data will be assessed descriptively by treatment group for each outcome variable specified in Section 8, each potential confounder specified in Section 6.6, and each potential effect modifier specified in Section 6.7.

## 8 STATISTICAL ANALYSES



In this section, the following details are provided for all primary and secondary outcomes for the trial:

- Outcome - A detailed description of the outcome variable, including the type of variable, whether it is a key secondary outcome, whether it is measured on the mother or infant, the relevant variables(s) in the CRF and how it will be calculated (if applicable).
- Analysis - The type of statistical analysis to be performed and the measure of treatment effect to be reported.

For each outcome variable, 95% confidence intervals will be reported to express uncertainty about the effect of treatment and statistical significance will be assessed at the 0.05 level using a two-sided comparative test of treatment effect, unless otherwise specified.

For binary outcomes, if the number of participants experiencing the outcome is considered too small for the planned analysis to be sensible, a Fisher's exact test will be performed instead with no adjustment made for baseline covariates. For analyses performed using a log binomial model, a log Poisson model with robust variance estimation will be used if the model fails to converge.

For count outcomes, if the fit of the log Poisson model is poor, the analysis will instead be performed using a negative binomial model and/or a zero-inflated model, as appropriate.

### 8.1 Gestational Age Definition

Gestational age at delivery will be determined using a combination of maternal menstrual dating and ultrasound dating as follows:

If performed, the first ultrasound scan performed between 6+0 to 13+0 weeks GA will be used in determining GA. If this ultrasound scan and menstrual dating agree within an error of four days, the estimated date of delivery shall be determined using menstrual dates.

Where menstrual dating and this ultrasound disagree by more than four days, then the estimated date of delivery shall be determined by the ultrasound dating.

If no ultrasound scan was performed between 6+0 and 13+0 weeks GA, then the first scan performed after 13+0 weeks but before 20+0 weeks GA will be used in determining GA. Where this ultrasound scan and menstrual dating agree within an error of seven days, the estimated date of delivery shall be determined using menstrual dates in accordance with established obstetric practice.

Where menstrual dating and this ultrasound disagree by more than seven days, then the estimated date of delivery shall be determined by the ultrasound dating in accordance with established obstetric practice.

For women with an ultrasound performed between 4+0 and 5+6 weeks GA, but no ultrasound between 6+0 and 20+0 weeks GA, this early scan will be used in determining GA. If the latest ultrasound scan performed between 4+0 and 5+6 weeks GA and menstrual

1  
2  
3  
4  
5  
6  
7  
8  
9  
10  
11  
12  
13  
14  
15  
16  
17  
18  
19  
20  
21  
22  
23  
24  
25  
26  
27  
28  
29  
30  
31  
32  
33  
34  
35  
36  
37  
38  
39  
40  
41  
42  
43  
44  
45  
46  
47  
48  
49  
50  
51  
52  
53  
54  
55  
56  
57  
58  
59  
60

dating agree within an error of four days, the estimated date of delivery shall be determined using menstrual dates.

Where menstrual dating and this ultrasound disagree by more than four days, then the estimated date of delivery shall be determined by the ultrasound dating.

For women with no ultrasound information before 20+0 weeks GA, the estimated date of delivery will be determined using menstrual dating.

For women with unknown LMP, the estimated date of delivery will be determined using the first ultrasound performed between 6+0 and before 20+0 weeks GA where available, or using the latest ultrasound performed between 4+0 and 5+6 weeks GA otherwise.

The GA at ultrasound (in weeks) will be determined as follows, in order of priority, depending on data recorded in CRF Section G and C.18 & C.19:

- GA from ultrasound, if recorded in CRF Section G
- $40 - (\text{EDD from CRF Section G} - \text{date of scan})/7$
- GA from medical records at date of scan in CRF section G
- $(\text{Date of scan} - \text{LMP from section C.18})/7$
- $40 - (\text{EDD from Section C.19} - \text{date of scan})/7$

Where the estimated date of delivery cannot be defined using this process, the relevant data will be provided to a team of three obstetricians who will review the data and determine the estimated date of delivery blinded to treatment group. If the three obstetricians disagree, estimated date of delivery will be determined by the majority in agreement.

The gestational age in days at birth (or other event of interest) will be determined from the estimated date of delivery using the equation  $[280 - (\text{estimated date of delivery} - \text{date of birth})]$ .

## 8.2 Primary Outcome Variable (EPTB)

Outcome: Mother level binary outcome. Early preterm birth defined as delivery before 34 weeks completed gestation. Gestational age is defined as in Section 8.1.

Analysis: Fit a log binomial GEE model to estimate the relative risk of early preterm birth (omega-3 LCPUFA relative to placebo). Statistical significance will be assessed using the O'Brien-Fleming type alpha spending function with symmetric stopping boundaries. The stopping boundary will be  $Z = \pm 2.96259$  (corresponding to  $\alpha = 0.00305$ ) at the interim analysis and  $Z = \pm 1.96857$  (corresponding to  $\alpha = 0.0490$ ) at the final analysis to maintain an overall type I error rate of  $\alpha = 0.05$ . Secondary analyses will be performed to test for effect modification (see Section 6.7) and in the subgroup of women who were compliant with the protocol as defined in Section 6.4.

### 8.3 Secondary Pregnancy Outcome Variables

#### 8.3.1 Preterm birth

Outcome: Mother level binary outcome (key secondary outcome). Preterm birth is considered to have occurred if the gestational age at delivery (as defined in Section 8.1) was <37 weeks and 0 days.

Analysis: Fit a log binomial GEE model to estimate the relative risk of preterm birth (omega-3 LCPUFA relative to placebo) and test for evidence of effect modification (see Section 6.7).

#### 8.3.2 Early Preterm Spontaneous Labour

Outcome: Mother level binary outcome (key secondary outcome). Early preterm spontaneous labour defined as delivery before 34 weeks completed gestation (gestational age as defined in Section 8.1) with spontaneous onset of labour (CRF reference I.2).

Analysis: Fit a log binomial GEE model to estimate the relative risk of early preterm spontaneous labour (omega-3 LCPUFA relative to placebo) and test for evidence of effect modification (see Section 6.7).

#### 8.3.3 Preterm Spontaneous Labour

Outcome: Mother level binary outcome (key secondary outcome). Preterm spontaneous labour defined as delivery before 37 weeks completed gestation (gestational age as defined in Section 8.1) with spontaneous onset of labour (CRF reference I.2).

Analysis: Fit a log binomial GEE model to estimate the relative risk of preterm spontaneous labour (omega-3 LCPUFA relative to placebo) and test for evidence of effect modification (see Section 6.7).

#### 8.3.4 Gestational Age at Birth

Outcome: Mother level continuous outcome (key secondary outcome). Gestational age in days as defined in Section 8.1.

Analysis: Fit a linear GEE model to estimate the difference in mean gestational age at birth (omega-3 LCPUFA minus placebo) and test for evidence of effect modification (see Section 6.7).

#### 8.3.5 Gestational Age at Birth (Censored)

Outcome: Mother level time to event outcome, where the event is spontaneous labour (key secondary outcome). Gestational age is defined as in Section 8.1 and will be measured in days. Induction (CRF reference I.3) and pre labour caesarean section will be treated as

1  
2  
3  
4 competing risks, since they prevent spontaneous labour from occurring. Pre labour  
5 caesarean section is considered to have occurred if the onset of labour was not  
6 spontaneous (I.2), the labour was not induced (I.3) and the mother had a caesarean section  
7 (I.4). Participants who withdraw and do not give consent to access their medical records will  
8 have their follow up time censored at the GA at which they withdraw (as defined in Section  
9 8.1), as the event of spontaneous labour is not observed. As the planned analysis includes a  
10 censoring mechanism for missing data on the outcome variable, this analysis will be  
11 completed using raw data only, not imputed data.  
12  
13  
14  
15  
16

17  
18 Analysis: Fit a Fine and Gray competing risks regression model to estimate the sub-  
19 distribution hazard ratio of spontaneous labour (omega-3 LCPUFA relative to placebo) and  
20 test for evidence of effect modification (see Section 6.7). A cluster adjusted variance  
21 estimator will be used to account for clustering due to mothers participating in the trial  
22 during more than one pregnancy. If the proportionality assumption of the Fine and Gray  
23 model is not met, a time-varying model will be used where time to event will be split into  
24 two or more periods in which the proportionality assumption is met.  
25  
26  
27  
28

### 29 **8.3.6 Pre Labour Premature Rupture of Membranes**

30 Outcome: Mother level binary outcome. Pre labour premature rupture of membranes is  
31 considered to have occurred if premature rupture of membranes is documented (CRF  
32 reference I.5).  
33  
34  
35

36 Analysis: Fit a log binomial GEE model to estimate the relative risk of pre labour premature  
37 rupture of membranes (omega-3 LCPUFA relative to placebo).  
38  
39  
40

### 41 **8.3.7 Pre Labour Preterm Premature Rupture of Membranes**

42 Outcome: Mother level binary outcome. Pre labour preterm premature rupture of  
43 membranes is considered to have occurred if preterm premature rupture of membranes is  
44 documented (CRF reference I.6).  
45  
46  
47

48 Analysis: Fit a log binomial GEE model to estimate the relative risk of pre labour preterm  
49 premature rupture of membranes (omega-3 LCPUFA relative to placebo).  
50  
51  
52

### 53 **8.3.8 Post-term Induction**

54 Outcome: Mother level binary outcome (key secondary outcome). Post-term induction is  
55 considered to have occurred if the labour was induced (CRF reference I.3) and the  
56 gestational age at delivery (as defined in Section 8.1) was >41 weeks and 0 days.  
57  
58  
59  
60

Analysis: Fit a log binomial GEE model to estimate the relative risk of post-term induction (omega-3 LCPUFA relative to placebo) and test for evidence of effect modification (see Section 6.7).

### 8.3.9 Clinical diagnosis of Post-term Induction

Outcome: Mother level binary outcome (key secondary outcome). Post-term induction is considered to have occurred if the labour was induced, with the reason for induction recorded as Post term, either >41 GA, or recorded as post term by the clinician recorded under the 'other' option (CRF reference I.3).

Analysis: Fit a log binomial GEE model to estimate the relative risk of clinical diagnosis of post-term induction (omega-3 LCPUFA relative to placebo) and test for evidence of effect modification (see Section 6.7).

### 8.3.10 Post-term Pre Labour Caesarean Section

Outcome: Mother level binary outcome (key secondary outcome). Post-term pre labour caesarean section is considered to have occurred if the onset of labour was not spontaneous (I.2), the labour was not induced (I.3), the mother had a caesarean (I.4) and the gestational age at delivery (as defined in Section 8.1) was >41 weeks and 0 days.

Analysis: Fit a log binomial GEE model to estimate the relative risk of post-term pre labour caesarean section (omega-3 LCPUFA relative to placebo) and test for evidence of effect modification (see Section 6.7).

### 8.3.11 Clinical diagnosis of Post-term Pre Labour Caesarean Section

Outcome: Mother level binary outcome (key secondary outcome). Post-term pre labour caesarean section is considered to have occurred if the onset of labour was not spontaneous (I.2), the labour was not induced (I.3), the mother had a caesarean (I.4) and the reason for caesarean is recorded as post term, either >41 GA, or recorded as post term by the clinician recorded under the 'other' option (CRF reference I.4.2).

Analysis: Fit a log binomial GEE model to estimate the relative risk of clinical diagnosis of post-term pre labour caesarean section (omega-3 LCPUFA relative to placebo) and test for evidence of effect modification (see Section 6.7).

### 8.3.12 Post-term Induction or Post-term Pre Labour Caesarean Section

Outcome: Mother level binary outcome (key secondary outcome). Post-term induction is considered to have occurred if the labour was induced (CRF reference I.3) and the gestational age at delivery (as defined in Section 8.1) was >41 weeks and 0 days. Post-term pre labour caesarean section is considered to have occurred if the onset of labour was not

spontaneous (I.2), the labour was not induced (I.3), the mother had a caesarean (I.4) and the gestational age at delivery (as defined in Section 8.1) was >41 weeks and 0 days.

Analysis: Fit a log binomial GEE model to estimate the relative risk of post-term induction or post-term pre labour caesarean section (omega-3 LCPUFA relative to placebo) and test for evidence of effect modification (see Section 6.7).

### 8.3.13 Clinical diagnosis of Post-term Induction or Post-term Pre Labour Caesarean Section

Outcome: Mother level binary outcome (key secondary outcome). Post-term induction is considered to have occurred if the labour was induced with the reason for induction recorded as Post term, either >41 GA, or recorded as post term by the clinician recorded under the 'other' option (CRF reference I.3) . Post-term pre labour caesarean section is considered to have occurred if the onset of labour was not spontaneous (I.2), the labour was not induced (I.3), the mother had a caesarean (I.4) and the reason for caesarean is recorded as post term, either >41 GA, or recorded as post term by the clinician recorded under the 'other' option (CRF reference I.4.2) .

Analysis: Fit a log binomial GEE model to estimate the relative risk of clinical diagnosis of post-term induction or post-term pre labour caesarean section (omega-3 LCPUFA relative to placebo) and test for evidence of effect modification (see Section 6.7).

### 8.3.14 Prolonged Gestation

Outcome: Mother level binary outcome. Prolonged gestation is considered to have occurred if the gestational age at delivery (as defined in Section 8.1) was >42 weeks and 0 days.

Analysis: Fit a log binomial GEE model to estimate the relative risk of prolonged gestation (omega-3 LCPUFA relative to placebo).

### 8.3.15 Caesarean Section

Outcome: Mother level binary outcome. Caesarean section as recorded on the CRF (reference I.4).

Analysis: Fit a log binomial GEE model to estimate the relative risk of caesarean section (omega-3 LCPUFA relative to placebo).

### 8.3.16 Gestational Diabetes Definition 1

Outcome: Mother level binary outcome. The presence of gestational diabetes will be indicated by either:

- 1) baseline blood glucose level >5.5mmol/L (CRF reference H.2.2)

OR

2) 2 hour blood glucose level  $>8\text{mmol/L}$  (CRF reference H.2.4).

Women who have a glucose challenge test (CRF reference H.1) but not a glucose tolerance test (CRF reference H.2) will be defined as not having gestational diabetes.

Analysis: Fit a log binomial GEE model to estimate the relative risk of gestational diabetes (omega-3 LCPUFA relative to placebo).

### 8.3.17 Gestational Diabetes Definition 2

Outcome: Mother level binary outcome. The presence of gestational diabetes will be indicated by at least one of:

1) baseline blood glucose level  $\geq 5.1\text{ mmol/L}$  (CRF reference H.2.2)

OR

2) 1 hour blood glucose level  $\geq 10.0\text{ mmol/L}$  (CRF reference H.2.3)

OR

3) 2 hour blood glucose level  $\geq 8.5\text{ mmol/L}$  (CRF reference H.2.4).

Women who have a glucose challenge test (CRF reference H.1) but not a glucose tolerance test (CRF reference H.2) will be defined as not having gestational diabetes.

Analysis: Fit a log binomial GEE model to estimate the relative risk of gestational diabetes (omega-3 LCPUFA relative to placebo).

### 8.3.18 Clinical Diagnosis of Gestational Diabetes

Outcome: Mother level binary outcome. Clinical diagnosis of gestational diabetes, as recorded on the CRF (reference H.3).

Analysis: Fit a log binomial GEE model to estimate the relative risk of a clinical diagnosis of gestational diabetes (omega-3 LCPUFA relative to placebo).

### 8.3.19 Pregnancy Induced Hypertension

Outcome: Mother level binary outcome. Pregnancy induced hypertension is considered to have occurred if there has been one systolic BP  $\geq 160\text{mmHg}$  and/or one diastolic BP  $\geq 110\text{mmHg}$  recorded after 20 weeks gestation (CRF reference H.4.1), or two consecutive systolic BP  $\geq 140\text{mmHg}$  and/or diastolic BP  $\geq 90\text{mmHg}$ , four or more hours apart, have been recorded after 20 weeks gestation (CRF reference H.4.2).

Analysis: Fit a log binomial GEE model to estimate the relative risk of pregnancy induced hypertension (omega-3 LCPUFA relative to placebo).

### 8.3.20 Pre-Eclampsia

Outcome: Mother level binary outcome. The presence of pre-eclampsia during pregnancy is indicated by the presence of both pregnancy induced hypertension (as defined in 8.3.19) and proteinuria, indicated by either

1) spot urine protein:creatinine ratio  $\geq 30\text{mg}/\text{mmol}$  (CRF reference H.5.1)

OR

2) one 24 hour urine collection with total protein  $\geq 0.3\text{g}/\text{L}$  (CRF reference H.5.2)

OR

3) two random urine collections  $\geq 1\text{g}/\text{L}$  (2+) (CRF reference H.5.3).

Analysis: Fit a log binomial GEE model to estimate the relative risk of pre-eclampsia (omega-3 LCPUFA relative to placebo).

### 8.3.21 Clinical Diagnosis of Pre-Eclampsia

Outcome: Mother level binary outcome. Clinical diagnosis of pre-eclampsia, as recorded on the CRF (reference H.6).

Analysis: Fit a log binomial GEE model to estimate the relative risk of a clinical diagnosis of pre-eclampsia (omega-3 LCPUFA relative to placebo).

### 8.3.22 Eclampsia

Outcome: Mother level binary outcome. Hospital admission for eclampsia, as recorded on the CRF (reference H.12).

Analysis: Fit a log binomial GEE model to estimate the relative risk of a hospital admission for eclampsia (omega-3 LCPUFA relative to placebo).

### 8.3.23 Postpartum Haemorrhage

Outcome: Mother level binary outcome. Clinical diagnosis of postpartum haemorrhage, as recorded on the CRF (reference I.9).

Analysis: Fit a log binomial GEE model to estimate the relative risk of a clinical diagnosis of postpartum haemorrhage (omega-3 LCPUFA relative to placebo).

### 8.3.24 Estimated Blood Loss at Birth

Outcome: Mother level continuous outcome. Estimated blood loss at birth (CRF reference I.10).

Analysis: Fit a linear GEE model to estimate the difference in mean estimated blood loss at birth (omega-3 LCPUFA minus placebo).



### 8.3.25 Maternal Serious Adverse Events

Outcome: Mother level binary outcomes. Any recorded maternal serious adverse event, where 'mother' is indicated on the CRF (Section L):

- Death
- Level 3 hospitalisation: Maternal admission to ICU
- Any of the above

Analysis: Fit separate log binomial GEE models to estimate the relative risk of each serious adverse event (omega-3 LCPUFA relative to placebo).

### 8.3.26 Length of Hospital Stay (Mother)

Outcome: Mother level count outcome. Number of days in hospital from birth, calculated as mother discharge date minus baby date of birth (CRF references I.12, J.5).

Analysis: Fit a log Poisson GEE model to estimate the ratio of mean number of days in hospital (omega-3 LCPUFA relative to placebo).

### 8.3.27 Maternal Use of Antibiotics

Outcome: Mother level binary outcome. Maternal use of antibiotics during pregnancy (CRF reference H.10), excluding prophylactic use for Caesarean sections.

Analysis: Fit a log binomial GEE model to estimate the relative risk of use of antibiotics (omega-3 LCPUFA relative to placebo).

## 8.4 Safety and Tolerability of DHA Supplementation

Outcome: Mother level binary outcomes. Reported occurrence of the following symptoms two weeks post randomisation (CRF reference D.4), at 28 weeks gestation (CRF reference E.4) and 34 weeks gestation (as CRF reference F.4):

- Diarrhoea
- Nausea
- Vomiting
- Burping
- Constipation
- Vaginal blood loss
- Nose bleeds
- Any gastro intestinal related symptom (diarrhoea, nausea, vomiting, burping or constipation)
- Any blood loss (vaginal blood loss or nose bleeds)
- Any of the above

Analysis: Fit separate repeated measures log binomial GEE models to estimate the relative risk of each safety and tolerability symptom (omega-3 LCPUFA relative to placebo). An interaction term between treatment group and time (2 weeks post randomisation, 28 weeks and 34 weeks) will be included in the initial model. If the interaction term is significant ( $p < 0.05$ ), relative risks for treatment will be reported for each time point. If the interaction term is not significant ( $p \geq 0.05$ ), the model will be re-fit without the interaction and one overall relative risk for treatment will be reported.

## 8.5 Secondary Neonatal Outcome Variables

### 8.5.1 Low Birth Weight

Outcome: Infant level binary outcome (key secondary outcome). Defined as birth weight less than 2500g (CRF reference J.9).

Analysis: Fit a log binomial GEE model to estimate the relative risk of low birth weight (omega-3 LCPUFA relative to placebo) and test for evidence of effect modification (see Section 6.7).

### 8.5.2 Very Low Birth Weight

Outcome: Infant level binary outcome. Defined as birth weight less than 1500g (CRF reference J.9).

Analysis: Fit a log binomial GEE model to estimate the relative risk of very low birth weight (omega-3 LCPUFA relative to placebo) and test for evidence of effect modification (see Section 6.7).

### 8.5.3 Very Small for Gestational Age

Outcome: Infant level binary outcome. Defined as birth weight (CRF reference J.9) less than 3rd percentile for corresponding GA (as defined in Section 8.1) and gender (CRF reference J.7), using percentiles as defined by Beeby PJ et al (1996).

Analysis: Fit a log binomial GEE model to estimate the relative risk of small for gestational age (omega-3 LCPUFA relative to placebo) and test for evidence of effect modification (see Section 6.7).

### 8.5.4 Small for Gestational Age

Outcome: Infant level binary outcome. Defined as birth weight (CRF reference J.9) less than 10th percentile for corresponding GA (as defined in Section 8.1) and gender (CRF reference J.7), using percentiles as defined by Beeby PJ et al (1996).

Analysis: Fit a log binomial GEE model to estimate the relative risk of small for gestational age (omega-3 LCPUFA relative to placebo) and test for evidence of effect modification (see Section 6.7).

#### 8.5.5 High Birth Weight

Outcome: Infant level binary outcome. Defined as birth weight greater than 4000g (CRF reference J.9).

Analysis: Fit a log binomial GEE model to estimate the relative risk of high birth weight (omega-3 LCPUFA relative to placebo) and test for evidence of effect modification (see Section 6.7).

#### 8.5.6 Large for Gestational Age

Outcome: Infant level binary outcome. Defined as birth weight (CRF reference J.9) greater than 90th percentile for corresponding GA (as defined in Section 8.1) and gender (CRF reference J.7), using percentiles as defined by Beeby PJ et al (1996).

Analysis: Fit a log binomial GEE model to estimate the relative risk of large for gestational age (omega-3 LCPUFA relative to placebo) and test for evidence of effect modification (see Section 6.7).

#### 8.5.7 Very Large for Gestational Age

Outcome: Infant level binary outcome. Defined as birth weight (CRF reference J.9) greater than 97th percentile for corresponding GA (as defined in Section 8.1) and gender (CRF reference J.7), using percentiles as defined by Beeby PJ et al (1996).

Analysis: Fit a log binomial GEE model to estimate the relative risk of large for gestational age (omega-3 LCPUFA relative to placebo) and test for evidence of effect modification (see Section 6.7).

#### 8.5.8 Birth Anthropometrics

Outcomes: Infant level continuous outcomes. The following birth anthropometrics will be analysed, using both the raw measurements (CRF reference J.9) and Z-scores for corresponding GA (as defined in Section 8.1) and gender (CRF reference J.7), using means and standard deviations as defined by Beeby PJ et al (1996):

- Birth weight (key secondary outcome)
- Birth length
- Birth head circumference

Analysis: Fit separate linear GEE models to estimate the difference in means for each birth anthropometric (omega-3 LCPUFA minus placebo) and test for evidence of effect modification (see Section 6.7).

### 8.5.9 Neonatal Complications

Outcome: Infant level binary outcomes. The following complications will be analysed:

- Intermittent positive pressure ventilation at birth, with or without cardiac compressions (CRF reference J.12)
- Use of supplemental oxygen (CRF reference J.15.1, number of days >0)
- Jaundice requiring phototherapy (CRF reference J.16.1)
- Hypoglycaemia requiring intravenous dextrose infusion (CRF reference J.16.2)
- Neonatal convulsion (CRF reference J.16.3)
- Any Brain Injury (CRF reference J.16.4)
- Surgery (CRF reference J.16.5)
- Necrotising enterocolitis (CRF reference J.16.6)
- Sepsis (CRF reference J.16.7)
- Retinopathy of prematurity (CRF reference J.16.8)
- Other neonatal complication (CRF reference J.16.9)
- Intraventricular Haemorrhage, grade 2 or higher (CRF J.16.4 and associated brain injury form)

Analysis: Fit separate log binomial GEE models to estimate the relative risk of each neonatal complication (omega-3 LCPUFA relative to placebo).

### 8.5.10 Duration of Supplemental Oxygen

Outcome: Infant level count outcome. Number of days of supplemental oxygen for those infants who required oxygen (CRF reference J.15.1, number of days >0).

Analysis: Fit a log Poisson GEE model to estimate the ratio of mean number of days of supplemental oxygen (omega-3 LCPUFA relative to placebo).

### 8.5.11 Infant Serious Adverse Event

Outcome: Infant level binary outcomes. Any recorded infant serious adverse event:

- Perinatal Death, defined as still birth, termination greater than 20 weeks gestation or death within 28 days of birth (CRF references J.3, J.17, Section L) (key secondary outcome)
- Still Birth (CRF reference J.3)
- Termination greater than 20 weeks gestation (CRF reference Section L)
- Death within 28 days of birth (CRF reference J.17)
- Major congenital abnormalities (CRF reference J.10)

- Admissions to intensive care up to 28 days post birth (CRF reference J.14), for infants born >34 weeks gestation (as defined in Section 8.1)
- Miscarriage before 20 weeks GA
- Pregnancy termination before 20 weeks GA
- Any of the above

Analysis: Fit separate log binomial GEE models to estimate the relative risk of each infant serious adverse event (omega-3 LCPUFA relative to placebo).

#### 8.5.12 Admission to Neonatal Intensive Care

Outcome: Infant level binary outcome (key secondary outcome). Any admission to neonatal intensive care up to 28 days post birth (CRF reference J.14).

Analysis: Fit separate log binomial GEE models to estimate the relative risk of admission to neonatal intensive care (omega-3 LCPUFA relative to placebo) and test for evidence of effect modification (see Section 6.7).

#### 8.5.13 Length of Stay in Neonatal Intensive Care Unit

Outcome: Infant level count outcome. Number of days in neonatal intensive care for those infants who were admitted, calculated as baby discharge date minus baby admission date (CRF references J.14.2 and J.14.1). If infants have multiple NICU admissions, the total number of days spent in NICU will be summed across all admissions.

Analysis: Fit a log Poisson GEE model to estimate the ratio of mean number of days in neonatal intensive care (omega-3 LCPUFA relative to placebo).

#### 8.5.14 Length of Hospital Stay (Infant)

Outcome: Infant level time to event outcome, where the event is hospital discharge. Time until hospital discharge will be calculated as baby discharge date minus baby date of birth (CRF references J.5, J.18). Death prior to discharge will be treated as a competing risk because it prevents hospital discharge from occurring.

Analysis: Fit a Fine and Gray competing risks regression model to estimate the sub-distribution hazard ratio of hospital discharge (omega-3 LCPUFA relative to placebo). A cluster adjusted variance estimator will be used to account for clustering due to siblings. If the proportionality assumption of the Fine and Gray model is not met, a time-varying model will be used where time to event will be split into two or more periods in which the proportionality assumption is met.

### 8.6 Secondary Outcome Variables Related to Trial Quality

### 8.6.1 Correctly Guessed Treatment Assignment

Outcome: Mother level binary outcome. Correctly guessed treatment assignment (CRF reference F.7). Responses recorded as 'Don't know' will be classified as incorrect guesses.

Analysis: Fit a log binomial GEE model to estimate the relative risk of correctly guessing treatment assignment (omega-3 LCPUFA relative to placebo). Calculate blindness index (Bang et al., 2004), which estimates the proportion of correct guesses beyond the level expected by chance separately for each treatment group.

### 8.6.2 Number of Capsules Missed

Outcome: Mother level categorical outcome. Number of capsules missed in the past week, recorded at 2 weeks post randomisation, 28 weeks and 34 weeks gestation (CRF references D.3, E.3, F.3). Number of capsules missed are categorised as None, 1-3, 4-6, 7-10, >10, Stopped completely.

Analysis: Fit a repeated measures ordinal logistic GEE model to estimate the odds of missing a greater number of capsules (omega-3 LCPUFA relative to placebo). An interaction term between treatment and time (2 weeks post randomisation, 28 weeks and 34 weeks) will be included in the initial model. If the interaction term is significant ( $p < 0.05$ ), odds ratios for treatment will be reported for each time point. If the interaction term is not significant ( $p \geq 0.05$ ), the model will be re-fit without the interaction and one overall odds ratio for treatment will be reported. If the proportional odds assumption is not met, fit a repeated measures multinomial logistic GEE model.

### 8.6.3 Number of Unused Capsules

Outcome: Mother level count outcome. Number of unused capsules at end of intervention period (F.6) minus the number expected. The expected number of capsules returned is calculated as:

[Total number of bottles dispensed (CRF reference A.6) x 90 (number of capsules per bottle)] - [3 x (min(Date at 34 weeks based on GA as defined in Section 8.1, CRF reference J.5 date of birth) CRF reference A1.1 Consent Date)]

Analysis: Fit a log Poisson GEE model to estimate the ratio of mean number of unused capsules (omega-3 LCPUFA relative to placebo).

### 8.6.4 Treatment Cessation

Outcome: Mother level binary outcome. Treatment is considered to have ceased if the patient completely stops taking the capsules at any time prior to 34 weeks gestation or birth, whichever occurs first, recorded at 2 weeks post randomisation (CRF reference D.3), 28 weeks gestation (E.3) or 34 weeks gestation (F.3, F.5).

Analysis: Fit a repeated measures log binomial GEE model to estimate the relative risk of ceasing treatment (omega-3 LCPUFA relative to placebo). An interaction term between treatment and time (2 weeks post randomisation, 28 weeks and 34 weeks) will be included in the initial model. If the interaction term is significant ( $p < 0.05$ ), relative risks for treatment will be reported for each time point. If the interaction term is not significant ( $p \geq 0.05$ ), the model will be re-fit without the interaction and one overall relative risk for treatment will be reported.

### 8.6.5 Blood Fatty Acid Concentrations

Outcome: Mother level continuous outcomes. Blood concentration of the following fatty acids at 34 weeks, as provided by the Waite laboratory:

- Docosahexaenoic acid (22:6n-3)
- Linoleic acid (18:2n-6)
- Arachidonic acid (20:4n-6)
- Eicosapentaenoic acid (20:5n-3)
- Docosapentaenoic acid (22:5n-3)

Analysis: Fit separate linear GEE models to estimate the difference in mean blood fatty acid concentration at 34 weeks (omega-3 LCPUFA minus placebo).

### 8.6.6 Use of Dietary Supplements

Outcome: Mother level binary outcome. Reported use of any other dietary supplements containing fish oil, DHA or EPA, recorded at 2 weeks post randomisation, 28 weeks and 34 weeks gestation (CRF references D.5, D.6, E.5, E.6, F.8, F.9).

Analysis: Fit a repeated measures log binomial GEE model to estimate the relative risk of use of other dietary supplements (omega-3 LCPUFA relative to placebo). An interaction term between treatment and time (2 weeks post randomisation, 28 weeks and 34 weeks) will be included in the initial model. If the interaction term is significant ( $p < 0.05$ ), relative risks for treatment will be reported for each time point. If the interaction term is not significant ( $p \geq 0.05$ ), the model will be re-fit without the interaction and one overall relative risk for treatment will be reported.

## 9 REFERENCES

Bang H, Ni L and Davis CE. (2004). Assessment of Blinding in Clinical Trials. *Controlled Clinical Trials*. 25: 143-156.

Beeby PJ, Bhulap T, Taylor LK. (1996). New South Wales population-based birthweight percentile charts. *Journal of Paediatrics and Child Health*. 32(6): 512-518.

1  
2  
3  
4 Chiba Y, VanderWeele T. (2011). A simple method for principal strata effects when the  
5 outcome has been truncated due to death. *American Journal of Epidemiology*. 173(7):745-  
6 751.  
7

8  
9  
10 Committee for Proprietary Medicinal Products (CPMP). (2004). Points to Consider on  
11 Adjustment for Baseline Covariates. *Statistics in Medicine*. 23: 701-109.  
12

13  
14 Graham JW, Olchowski AE and Gilreath TD. (2007). How Many Imputations are Really  
15 Needed? Some Practical Clarifications of Multiple Imputation Theory. *Prevention Science*. 8:  
16 206-213  
17

18  
19 Kahan BC and Morris TP. (2012). Improper Analysis of Trials Randomised using Stratified  
20 Blocks or Minimisation. *Statistics in Medicine*. 31: 328-340.  
21

22  
23 Lumley T, Diehr P, Emerson S and Chen L. (2002). The Importance of the Normality  
24 Assumption in Large Public Health Data Sets. *Annual Review of Public Health*. 23:151-169  
25

26  
27 Makrides M et al (2010). Effect of n-3 docosahexaenoic acid (DHA) supplementation during  
28 pregnancy on maternal depression and neurodevelopment of young children: a randomized  
29 controlled trial. *JAMA*. 304(15):1675-83.  
30

31  
32 Yelland LN, Sullivan TR, Price DJ and Lee KJ. Sample size calculations for randomised trials  
33 including both independent and paired data. *Statistics in Medicine*. 36: 1227-1239.  
34  
35  
36  
37  
38  
39  
40  
41  
42  
43  
44  
45  
46  
47  
48  
49  
50  
51  
52  
53  
54  
55  
56  
57  
58  
59  
60



## ORIP Protocol Date and Version Identifier

**Current Protocol Issue Date:** 14<sup>th</sup> September 2015

**Protocol Amendment Number:** 04

### Revision Chronology:

|                 |                                                                                                                                                                                                                                                                                                                                                                                                                                                                                                                                                                                                                                                                                                                                                                                                                                                                                                                                                                                                                                                                                                                                                                                                                                                                                                                                                                                                                                                                                                                                                                                                                                                                                                                                                                                                    |
|-----------------|----------------------------------------------------------------------------------------------------------------------------------------------------------------------------------------------------------------------------------------------------------------------------------------------------------------------------------------------------------------------------------------------------------------------------------------------------------------------------------------------------------------------------------------------------------------------------------------------------------------------------------------------------------------------------------------------------------------------------------------------------------------------------------------------------------------------------------------------------------------------------------------------------------------------------------------------------------------------------------------------------------------------------------------------------------------------------------------------------------------------------------------------------------------------------------------------------------------------------------------------------------------------------------------------------------------------------------------------------------------------------------------------------------------------------------------------------------------------------------------------------------------------------------------------------------------------------------------------------------------------------------------------------------------------------------------------------------------------------------------------------------------------------------------------------|
| ... 2013-Mar-11 | Original                                                                                                                                                                                                                                                                                                                                                                                                                                                                                                                                                                                                                                                                                                                                                                                                                                                                                                                                                                                                                                                                                                                                                                                                                                                                                                                                                                                                                                                                                                                                                                                                                                                                                                                                                                                           |
| ... 2013-Sep-13 | <p>Amendment 01. Protocol v2.:</p> <p>Throughout the document: Replacement of the term 'placebo' with 'control'</p> <p>Page 6: Design: Revised from 'Randomised placebo-controlled multi-centre trial' to 'Double blind, randomised controlled multi-centre trial'.</p> <p>Page 6: Participants and Page 13: Section 5.2: Number of participants: Increase in the total number of participants from 5,510 to 5,540, i.e. 2770 per randomised group, will be included in the study.</p> <p>Page 8: Section 2.4.2: Data Monitoring Committee: Renaming of the 'Trial Monitoring Committee' to the 'Data Monitoring Committee'.</p> <p>Page 13: Section 5.4: Primary and secondary outcome measures; bullet point 4 and Page 19: Section 8.5: At birth and discharge from hospital after birth; bullet point 5: Addition of jaundice, hypoglycaemia, brain injury (including intra-ventricular haemorrhage (IVH)) and retinopathy of prematurity as neonatal complications as a secondary outcome measure.</p> <p>Page 14: Section 6.1.1: Description: Change of <math>\alpha</math>-3 LCPUFA content in each capsule from 320mg to 300mg</p> <p>Page 16: Section 7.2: Exclusion criteria: The exclusion criteria relating to women who are taking dietary supplements containing LCPUFA has been revised to replace &gt;200mg/day with &gt;150mg/day. Women taking dietary supplements containing LCPUFA at screening will be considered eligible on the basis they agree to stop taking these dietary supplements at randomisation and throughout the duration of the study. A new exclusion criteria has been included to reflect this.</p> <p>Page 17: Section 7.3: Randomisation procedures: Stratification will be by centre and supplements (containing no LCPUFA vs <math>\leq 150</math></p> |

|                  |                                                                                                                                                                                                                                                                                                                                                                                                                                                                                                                                                                                                                                                                                                                                                                                                                                                                                                                                                                                                                                                                                                                                                                                                                                                                                                                                                                                                                                                                                                                                                                                                                                                                                                   |
|------------------|---------------------------------------------------------------------------------------------------------------------------------------------------------------------------------------------------------------------------------------------------------------------------------------------------------------------------------------------------------------------------------------------------------------------------------------------------------------------------------------------------------------------------------------------------------------------------------------------------------------------------------------------------------------------------------------------------------------------------------------------------------------------------------------------------------------------------------------------------------------------------------------------------------------------------------------------------------------------------------------------------------------------------------------------------------------------------------------------------------------------------------------------------------------------------------------------------------------------------------------------------------------------------------------------------------------------------------------------------------------------------------------------------------------------------------------------------------------------------------------------------------------------------------------------------------------------------------------------------------------------------------------------------------------------------------------------------|
|                  | <p>LCPUFA/day prior to randomisation). The amount of LCPUFA has been decreased from &lt;200 LCPUFA/day to <math>\leq 150</math> LCPUFA/day.</p> <p>Page 18: Section 8.3: At the second follow up call (28 weeks gestation): Inclusion of an additional telephone contact point at 28 weeks' gestation in between the 2 weeks' post randomisation telephone contact and 34 weeks' gestation.</p> <p>Page 18: Section 8.5: At birth and discharge from hospital after birth: Additional text has been included.</p> <p>Page 22: Section 10.2: Data analysis: Inclusion of a single planned interim analysis to be performed after data collection is completed for the first 50% of the target number of randomised participants</p> <p>Page 29 and 30: Appendix 1: Inclusion of the actual Certificate of Analysis for the active and control capsules.</p>                                                                                                                                                                                                                                                                                                                                                                                                                                                                                                                                                                                                                                                                                                                                                                                                                                        |
| ... 2014-Apr-04: | <p>Amendment No.2: Protocol V3</p> <p>Page 13 Section 5.4: Primary and secondary outcome measures; bullet point 5: At the end of the bullet point, the following sentences have been added: 'Intraventricular haemorrhage is defined as intraventricular haemorrhage seen on either side of the head by imaging or post mortem examination;</p> <p>Grade 1 – Sub ependymal germinal matrix haemorrhage.<br/> Grade 2 – Intraventricular haemorrhage with no ventricular distension.<br/> Grade 3 – Intraventricular haemorrhage with ventricle distended with blood.<br/> Grade 4 – Intraparenchymal haemorrhage. Sepsis is defined as a clinical picture consistent with sepsis, and either a positive bacterial or fungal culture of blood and/or cerebrospinal fluid, or a positive urine culture by sterile collection only.'</p> <p>Page 14 Section 5.4: Primary and secondary outcome measures; bullet point 8 and Page 20: Section 9.1: Serious Adverse Event (SAE): Revised 'SAEs (deaths; maternal or infant admissions to intensive care; and major congenital anomalies)' to 'SAEs [maternal or fetal deaths (stillbirth), fetal loss (miscarriage)]; maternal admissions to intensive care; admissions to intensive care for infants born after 34 weeks; and major congenital anomalies]'</p> <p>Page 18 Section 8.3: Between 22 and 26 weeks' gestation: Addition of a blood sample via venepuncture and a urine sample collection at this time.</p> <p>Page 19 Section 8.6 At birth and discharge from hospital after birth; bullet point 4: Revised from 'small for gestational age (defined as below the 10th percentile for corresponding gestation age and sex)' to 'small</p> |

|                        |                                                                                                                                                                                                                                                                                                                                                                                                                                                                                                                                                       |
|------------------------|-------------------------------------------------------------------------------------------------------------------------------------------------------------------------------------------------------------------------------------------------------------------------------------------------------------------------------------------------------------------------------------------------------------------------------------------------------------------------------------------------------------------------------------------------------|
|                        | <p>for gestational age (defined in two different ways: below the 10th centile and below 3rd centile for corresponding gestation age and sex)'.<br/><br/>Page 19 Section 8.5: 34 weeks' gestation; bullet point 3: Revised from 'Collection of maternal blood sample (finger prick) for fatty acid analysis' to 'Collection of maternal blood sample (finger prick) for fatty acid analysis at 34 weeks appointment or birth whichever occurs first.'</p>                                                                                              |
| <p>... 2015-Sep-14</p> | <p>Amendment 3; Protocol v4<br/><br/>Page 1: Design: Principal Investigator changed from to Dr Shao (Jo) Zhou to Primary Contact Professor Maria Makrides<br/><br/>Page 8: Addition of Dr K Best as Chief Investigator<br/><br/>Page 9: Addition of Study Locations: Joondalup Health Service, Brisbane Mater Mothers Hospital, Werribee Mercy Hospital, Northern Adelaide Health Service (Lyell McEwin Hospital and Modbury Hospital)<br/><br/>Page 23: Emergency contact details: Changed from to Dr Shao (Jo) Zhou to Professor Maria Makrides</p> |

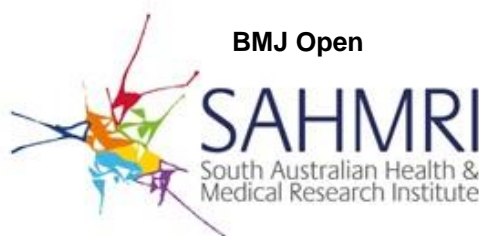

## The ORIP Trial

### Participant Information Sheet and Informed Consent Form

**Scientific Title:** Omega-3 fats to Reduce the Incidence of Prematurity – the ORIP Trial

You are invited to participate in a study to determine whether increasing the amount of a special fat called DHA in the diet of pregnant women lowers the risk of preterm birth. This study is being conducted by Dr Jo Zhou and her colleagues from the South Australian Health and Medical Research Institute (SAHMRI) and the University of Adelaide.

#### Why are we doing this study?

Most infants are born at term (around 40 weeks of pregnancy) but unfortunately some infants are born prematurely (before 37 weeks of pregnancy). Although we have made tremendous improvements in the care of premature infants there are still many health risks of being born early including developmental delay, chronic lung disease and even death in rare cases. These risks are greater the earlier the baby is born, particularly in those born very premature (less than 34 weeks). This study will investigate whether taking a natural dietary supplement, a fish oil extract rich in the omega 3 fat called DHA, will help prevent very premature delivery.

DHA is found in fish and fish oils and is thought to have a number of health benefits including helping to maintain a pregnancy to full term. We have found evidence to support this when we conducted a study of DHA supplementation in over 2,000 pregnant women to see if DHA supplementation in pregnancy benefits the development of children (the DOMInO trial). We observed that women who took DHA-rich fish oil supplements from 20 weeks until birth had pregnancies that were 1-2 days longer than women in the control group. We also saw that fewer women in the DHA-rich fish oil group gave birth to very premature babies. However, this was offset to some extent by an increase in the number of women who had gone over their due date and were induced or had Caesarean-sections.

In the ORIP trial, we will examine the effects of taking DHA supplements in pregnancy more carefully and focus on the rate of preterm birth. We will use the same treatment as in the DOMInO trial, but we will start the supplementation earlier and stop the supplements at 34 weeks. We hope that this can prevent very premature birth without increasing the need for inducing birth or Caesarean section.

#### What is involved?

You will be randomly assigned (like tossing a coin) to one of two groups. One group will be asked to take capsules with DHA-rich fish oil and the other group will take capsules containing a blend of vegetable oils (canola, sunflower and palm oils) with a small amount of fish oil with DHA to best match what is typical in the Australian diet and to aid masking. Neither you, nor the research team, will be able to choose which group you are in or know which type of capsules you have been assigned to take. You will be asked to take 3 capsules per day that are easy to swallow from enrolment until 34 weeks pregnancy or the birth of your baby, whichever comes first. The total amount of fat from the 3 capsules is tiny – only 1.5 gms per day which is negligible in terms of energy.

The dose of DHA in the DHA-rich fish oil capsules is the same as that used in DOMInO and has been shown to be safe. The only side effect was some women reporting fishy burps. The other

capsules will contain DHA at a level that approximates many DHA fortified foods, for example, 2 slices of DHA fortified bread.

You can be part of this study if you are under 20 weeks of pregnancy. If you are on multivitamin supplements containing fish oil you can still take part in the study if you are willing to stop taking those supplements or change to ones that do not contain fish oil.

### What will happen during the study?

1. At enrolment, we will collect some information about you, including contact details, age, weight, height, education, occupation, smoking status and pregnancy related information.
2. A tiny blood sample by finger prick will be taken at enrolment and again at 34 weeks of pregnancy to assess fatty acid levels.
3. We will also contact you 2 weeks after enrolment and at 28 weeks of pregnancy to monitor your progress, ask a few questions about compliance and answer any questions you may have.
4. Following the birth of your baby, details about your pregnancy and birth as well as your infant will be collected from your medical records and your baby's medical records.

### Optional blood and urine collection for an additional study related to the ORIP trial

The following samples are optional; if you decide not to have these samples taken you can still participate in the study. For those who choose to have these samples taken, they may be used to look at how fats work in the body (mechanisms of action) and how they might interact with other agents. The collection and analysis of these optional additional samples will help to understand how DHA may improve immune function and lower the risk of preterm birth. Your data (without any way to identify you) may be used in pooled results from different studies so we can gain a more complete understanding. Following analysis for the ORIP trial remaining samples may be stored for use in future research studies that may or may not be related to the original research project.

These samples include:

- An extra 20mL of blood collected via venepuncture once at the start and at mid-pregnancy between 22-26 weeks.
- A urine sample collected at mid-pregnancy between 22-26 weeks
- A cord blood and placenta sample collected at birth. The cord blood collected for this study will preclude families from using it for other purposes in the future.

We will reimburse you with \$15 for your travel costs should your enrolment and / or 34 week appointments at the hospital fall outside your regular antenatal visits.

### Possible benefits

You may or may not directly benefit by your participation in this study. However, participants taking the capsules containing the higher dose of DHA may be at less risk of giving birth to a very premature baby.

### Possible risks

We have already shown in the DOMInO trial that DHA at the dose to be used in the study is safe. At extremely high doses (12 times higher than the dose in this study) DHA rich fish oil may result in an approximately 10% increase in blood clotting time and a 10% decrease in blood pressure, neither of which is considered dangerous. Taking blood may cause brief discomfort or pain. All blood samples will be taken by trained, experienced staff to minimise any discomfort.

### Future follow-up studies

DHA has a number of potential health benefits. We may conduct follow-up studies to determine the potential benefits. If you consent to participate in this trial it does not mean you have agreed to any future studies. We would contact you again to see if you are willing to take part as each study begins.

### Alternate Contacts

We recognise that people often change their telephone number and address, and therefore cannot be contacted by researchers. To help keep in contact with you we are asking you to provide us with the names and contact details of persons who would be able to let us know your new contact details. These people are usually friends or relatives and are called alternate contacts. If we needed to use one of the alternate contacts we would call them, explain who we are and that you were involved in a study and have given us their contact details so that they can put us in touch with you.

### Your rights

Participation in any research project is voluntary and you are free to withdraw from the study at any time without affecting yours or your child's care in any way. If you decide to withdraw, please let any member of the research team know. All information gathered will be treated with confidence and no information that could identify you or your baby will be released to any person not associated directly with the study. These results may eventually be published in medical journals or at professional meetings, but you or your child will not be identified in any way.

Your information will remain confidential except in the case of a legal requirement to pass on personal information to authorised third parties. This requirement is standard and applies to information collected both in research and non-research situations. Such requests to access information are rare; however we have an obligation to inform you of this possibility.

### Any questions?

If at any time during the study you have any problems regarding appointments or have any other queries, please ring our office on **8161 7512** and leave a message on our answering machine. One of our staff will return your call as soon as possible. Alternatively, you can email us at [orip@sahmri.com](mailto:orip@sahmri.com). If you have a problem and would like to talk to us immediately please ring **0474 333 001** and one of our research team members will answer your call.

### Study Updates

Detailed information about the ORIP study and other Child Nutrition Research Centre studies and trials can be found on the SAHMRI Healthy Mothers, Babies and Children web page: [www.sahmri.com/our-research/themes/healthy-mothers-babies-children/theme/theme-overview](http://www.sahmri.com/our-research/themes/healthy-mothers-babies-children/theme/theme-overview). More information about the Child Nutrition Research Centre and the work we do can be found on Facebook at [www.facebook.com/CNRCAdelaide](http://www.facebook.com/CNRCAdelaide).

### Study approval

This study has been reviewed and approved by the Human Research Ethics Committee at the Women's & Children's Health Network. If you wish to discuss the approval process with someone not directly involved, or have any concern or complaint, you may contact the Research Secretariat, Ms Brenda Penny on: (08) 8161 6521.

**WOMEN'S & CHILDREN'S HEALTH NETWORK (WCHN)  
HUMAN RESEARCH ETHICS COMMITTEE (HREC)**

**CONSENT FORM**

The ORIP trial

**SCIENTIFIC TITLE:** Omega-3 Fats to Reduce the Incidence of Prematurity - the ORIP trial

I \_\_\_\_\_  
hereby consent to my involvement in the research project entitled:

*"Omega-3 Fats to Reduce the Incidence of Prematurity"*

1. The nature and purpose of the research project described on the attached Information Sheet has been explained to me. I understand it and agree to taking part.
2. I understand that I may not directly benefit by taking part in this study.
3. I acknowledge that the possible risks and/or side effects, discomforts and inconveniences, as outlined in the Information Sheet, have been explained to me.
4. I understand that I can withdraw from the study at any stage and that this will not affect medical care or any aspects of my own or my child's relationship with this healthcare service.
5. I understand that there will be no payment to me for taking part in this study but that I will be reimbursed for travel costs should my enrolment and / or 34 week appointments at the hospital fall outside my regular antenatal visits.
6. I have had the opportunity to discuss taking part in this research project with a family member or friend, and/or have had the opportunity to have a family member or friend present whilst the research project was being explained by the researcher.
7. I am aware that I should retain a copy of the Consent Form, when completed, and the Information Sheet.
8. I consent to the following:
  - 1) To take the assigned capsules from trial entry until 34 weeks of pregnancy or the birth of my baby, whichever comes first.
  - 2) At trial entry and at 34 weeks pregnancy or at birth whichever comes first, have a finger prick blood sample taken from me.
  - 3) To be contacted 2 weeks after enrolment and at 28 weeks of pregnancy to monitor my progress, ask a few questions about compliance.

- 1  
2  
3  
4  
5  
6  
7  
8  
9  
10  
11  
12  
13  
14  
15  
16  
17  
18  
19  
20  
21  
22  
23  
24  
25  
26  
27  
28  
29  
30  
31  
32  
33
9. I additionally consent to: (please circle)
- 1) Have my blood collected from me at the start of the study and in mid-pregnancy (between 22-26 weeks) Yes / No
  - 2) Provide a urine sample in mid-pregnancy (between 22-26 weeks) Yes / No
  - 3) Have a cord blood sample collected at birth Yes / No
  - 4) Have a placenta sample collected at birth Yes/ No
10. I do / do not consent to the samples being used in any other research project, provided the project has the approval of the Women's & Children's Health Network Human Research Ethics Committee.
11. I agree to the accessing of my and my child's medical records at the Women's and Children's Health Network and any other hospitals my baby and I may be transferred to and from, for the purpose of this study.
12. I understand that the alternate contacts provided by me may be used to contact me as explained in the information sheet for study related purposes.
13. I am aware that I may be contacted regarding future follow-up studies.
14. I understand that my and my child's information will be kept confidential as explained in the information sheet except where there is a requirement by law for it to be divulged.

34  
35  
36  
37  
38  
39  
40  
41  
42  
43  
44

Signed: .....

Relationship to Patient: .....

Full name of patient: .....

Dated:.....

I certify that I have explained the study to the parent mother and consider that she understands what is involved.

45  
46  
47  
48  
49  
50  
51  
52  
53  
54  
55  
56  
57  
58  
59  
60

Signed: ..... Title: .....

Dated: .....



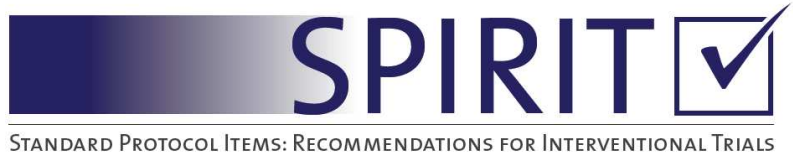

1  
2  
3  
4  
5  
6  
7  
8  
9  
10  
11  
12  
13  
14  
15  
16  
17  
18  
19  
20  
21  
22  
23  
24  
25  
26  
27  
28  
29  
30  
31  
32  
33  
34  
35  
36  
37  
38  
39  
40  
41  
42  
43  
44  
45  
46  
47  
48  
49

SPIRIT 2013 Checklist: Recommended items to address in a clinical trial protocol and related documents\*

| Section/item                      | Item No | Description                                                                                                                                                                                                                                                                              | Addressed on page number |
|-----------------------------------|---------|------------------------------------------------------------------------------------------------------------------------------------------------------------------------------------------------------------------------------------------------------------------------------------------|--------------------------|
| <b>Administrative information</b> |         |                                                                                                                                                                                                                                                                                          |                          |
| Title                             | 1       | Descriptive title identifying the study design, population, interventions, and, if applicable, trial acronym                                                                                                                                                                             | 1                        |
| Trial registration                | 2a      | Trial identifier and registry name. If not yet registered, name of intended registry                                                                                                                                                                                                     | 4                        |
|                                   | 2b      | All items from the World Health Organization Trial Registration Data Set                                                                                                                                                                                                                 | Yes                      |
| Protocol version                  | 3       | Date and version identifier                                                                                                                                                                                                                                                              | Supp.                    |
| Funding                           | 4       | Sources and types of financial, material, and other support                                                                                                                                                                                                                              | 20                       |
| Roles and responsibilities        | 5a      | Names, affiliations, and roles of protocol contributors                                                                                                                                                                                                                                  | 1                        |
|                                   | 5b      | Name and contact information for the trial sponsor                                                                                                                                                                                                                                       | 1                        |
|                                   | 5c      | Role of study sponsor and funders, if any, in study design; collection, management, analysis, and interpretation of data; writing of the report; and the decision to submit the report for publication, including whether they will have ultimate authority over any of these activities | N/A                      |
|                                   | 5d      | Composition, roles, and responsibilities of the coordinating centre, steering committee, endpoint adjudication committee, data management team, and other individuals or groups overseeing the trial, if applicable (see Item 21a for data monitoring committee)                         | 16                       |

## Introduction

|                                                           |     |                                                                                                                                                                                                                                                                                                                                                                                |             |
|-----------------------------------------------------------|-----|--------------------------------------------------------------------------------------------------------------------------------------------------------------------------------------------------------------------------------------------------------------------------------------------------------------------------------------------------------------------------------|-------------|
| Background and rationale                                  | 6a  | Description of research question and justification for undertaking the trial, including summary of relevant studies (published and unpublished) examining benefits and harms for each intervention                                                                                                                                                                             | 5           |
|                                                           | 6b  | Explanation for choice of comparators                                                                                                                                                                                                                                                                                                                                          | 5           |
| Objectives                                                | 7   | Specific objectives or hypotheses                                                                                                                                                                                                                                                                                                                                              | 10, 11      |
| Trial design                                              | 8   | Description of trial design including type of trial (eg, parallel group, crossover, factorial, single group), allocation ratio, and framework (eg, superiority, equivalence, noninferiority, exploratory)                                                                                                                                                                      | 8           |
| <b>Methods: Participants, interventions, and outcomes</b> |     |                                                                                                                                                                                                                                                                                                                                                                                |             |
| Study setting                                             | 9   | Description of study settings (eg, community clinic, academic hospital) and list of countries where data will be collected. Reference to where list of study sites can be obtained                                                                                                                                                                                             | 8           |
| Eligibility criteria                                      | 10  | Inclusion and exclusion criteria for participants. If applicable, eligibility criteria for study centres and individuals who will perform the interventions (eg, surgeons, psychotherapists)                                                                                                                                                                                   | 8, 9        |
| Interventions                                             | 11a | Interventions for each group with sufficient detail to allow replication, including how and when they will be administered                                                                                                                                                                                                                                                     | 9           |
|                                                           | 11b | Criteria for discontinuing or modifying allocated interventions for a given trial participant (eg, drug dose change in response to harms, participant request, or improving/worsening disease)                                                                                                                                                                                 | N/A         |
|                                                           | 11c | Strategies to improve adherence to intervention protocols, and any procedures for monitoring adherence (eg, drug tablet return, laboratory tests)                                                                                                                                                                                                                              | 10          |
|                                                           | 11d | Relevant concomitant care and interventions that are permitted or prohibited during the trial                                                                                                                                                                                                                                                                                  | N/A         |
| Outcomes                                                  | 12  | Primary, secondary, and other outcomes, including the specific measurement variable (eg, systolic blood pressure), analysis metric (eg, change from baseline, final value, time to event), method of aggregation (eg, median, proportion), and time point for each outcome. Explanation of the clinical relevance of chosen efficacy and harm outcomes is strongly recommended | 10, 11      |
| Participant timeline                                      | 13  | Time schedule of enrolment, interventions (including any run-ins and washouts), assessments, and visits for participants. A schematic diagram is highly recommended (see Figure)                                                                                                                                                                                               | 12 & Fig. 2 |

1  
2  
3 Sample size 14 Estimated number of participants needed to achieve study objectives and how it was determined, including 12, 13  
4 clinical and statistical assumptions supporting any sample size calculations

5  
6 Recruitment 15 Strategies for achieving adequate participant enrolment to reach target sample size 13  
7

8 **Methods: Assignment of interventions (for controlled trials)**  
9

10 Allocation:

11  
12 Sequence generation 16a Method of generating the allocation sequence (eg, computer-generated random numbers), and list of any 13  
13 factors for stratification. To reduce predictability of a random sequence, details of any planned restriction  
14 (eg, blocking) should be provided in a separate document that is unavailable to those who enrol participants  
15 or assign interventions

16  
17 Allocation concealment mechanism 16b Mechanism of implementing the allocation sequence (eg, central telephone; sequentially numbered, 13  
18 opaque, sealed envelopes), describing any steps to conceal the sequence until interventions are assigned  
19  
20

21  
22 Implementation 16c Who will generate the allocation sequence, who will enrol participants, and who will assign participants to 13, 14  
23 interventions  
24

25 Blinding (masking) 17a Who will be blinded after assignment to interventions (eg, trial participants, care providers, outcome 14  
26 assessors, data analysts), and how  
27

28 17b If blinded, circumstances under which unblinding is permissible, and procedure for revealing a participant's 14  
29 allocated intervention during the trial  
30  
31

32 **Methods: Data collection, management, and analysis**  
33

34 Data collection methods 18a Plans for assessment and collection of outcome, baseline, and other trial data, including any related 14, 15  
35 processes to promote data quality (eg, duplicate measurements, training of assessors) and a description of  
36 study instruments (eg, questionnaires, laboratory tests) along with their reliability and validity, if known.  
37 Reference to where data collection forms can be found, if not in the protocol  
38

39 18b Plans to promote participant retention and complete follow-up, including list of any outcome data to be 14, 15  
40 collected for participants who discontinue or deviate from intervention protocols  
41  
42  
43  
44  
45

|    |                                 |     |                                                                                                                                                                                                                                                                                                                                       |               |
|----|---------------------------------|-----|---------------------------------------------------------------------------------------------------------------------------------------------------------------------------------------------------------------------------------------------------------------------------------------------------------------------------------------|---------------|
| 1  |                                 |     |                                                                                                                                                                                                                                                                                                                                       |               |
| 2  |                                 |     |                                                                                                                                                                                                                                                                                                                                       |               |
| 3  | Data management                 | 19  | Plans for data entry, coding, security, and storage, including any related processes to promote data quality (eg, double data entry; range checks for data values). Reference to where details of data management procedures can be found, if not in the protocol                                                                     | 15, 16        |
| 4  |                                 |     |                                                                                                                                                                                                                                                                                                                                       |               |
| 5  |                                 |     |                                                                                                                                                                                                                                                                                                                                       |               |
| 6  |                                 |     |                                                                                                                                                                                                                                                                                                                                       |               |
| 7  | Statistical methods             | 20a | Statistical methods for analysing primary and secondary outcomes. Reference to where other details of the statistical analysis plan can be found, if not in the protocol                                                                                                                                                              | 15, Supp. SAP |
| 8  |                                 |     |                                                                                                                                                                                                                                                                                                                                       |               |
| 9  |                                 |     |                                                                                                                                                                                                                                                                                                                                       |               |
| 10 |                                 | 20b | Methods for any additional analyses (eg, subgroup and adjusted analyses)                                                                                                                                                                                                                                                              | 16            |
| 11 |                                 |     |                                                                                                                                                                                                                                                                                                                                       |               |
| 12 |                                 | 20c | Definition of analysis population relating to protocol non-adherence (eg, as randomised analysis), and any statistical methods to handle missing data (eg, multiple imputation)                                                                                                                                                       | 16            |
| 13 |                                 |     |                                                                                                                                                                                                                                                                                                                                       |               |
| 14 |                                 |     |                                                                                                                                                                                                                                                                                                                                       |               |
| 15 |                                 |     |                                                                                                                                                                                                                                                                                                                                       |               |
| 16 | <b>Methods: Monitoring</b>      |     |                                                                                                                                                                                                                                                                                                                                       |               |
| 17 |                                 |     |                                                                                                                                                                                                                                                                                                                                       |               |
| 18 | Data monitoring                 | 21a | Composition of data monitoring committee (DMC); summary of its role and reporting structure; statement of whether it is independent from the sponsor and competing interests; and reference to where further details about its charter can be found, if not in the protocol. Alternatively, an explanation of why a DMC is not needed | 16, 17        |
| 19 |                                 |     |                                                                                                                                                                                                                                                                                                                                       |               |
| 20 |                                 |     |                                                                                                                                                                                                                                                                                                                                       |               |
| 21 |                                 |     |                                                                                                                                                                                                                                                                                                                                       |               |
| 22 |                                 |     |                                                                                                                                                                                                                                                                                                                                       |               |
| 23 |                                 | 21b | Description of any interim analyses and stopping guidelines, including who will have access to these interim results and make the final decision to terminate the trial                                                                                                                                                               | 16            |
| 24 |                                 |     |                                                                                                                                                                                                                                                                                                                                       |               |
| 25 |                                 |     |                                                                                                                                                                                                                                                                                                                                       |               |
| 26 | Harms                           | 22  | Plans for collecting, assessing, reporting, and managing solicited and spontaneously reported adverse events and other unintended effects of trial interventions or trial conduct                                                                                                                                                     | 17            |
| 27 |                                 |     |                                                                                                                                                                                                                                                                                                                                       |               |
| 28 |                                 |     |                                                                                                                                                                                                                                                                                                                                       |               |
| 29 | Auditing                        | 23  | Frequency and procedures for auditing trial conduct, if any, and whether the process will be independent from investigators and the sponsor                                                                                                                                                                                           | 14, 15        |
| 30 |                                 |     |                                                                                                                                                                                                                                                                                                                                       |               |
| 31 |                                 |     |                                                                                                                                                                                                                                                                                                                                       |               |
| 32 |                                 |     |                                                                                                                                                                                                                                                                                                                                       |               |
| 33 | <b>Ethics and dissemination</b> |     |                                                                                                                                                                                                                                                                                                                                       |               |
| 34 |                                 |     |                                                                                                                                                                                                                                                                                                                                       |               |
| 35 | Research ethics approval        | 24  | Plans for seeking research ethics committee/institutional review board (REC/IRB) approval                                                                                                                                                                                                                                             | 17            |
| 36 |                                 |     |                                                                                                                                                                                                                                                                                                                                       |               |
| 37 |                                 |     |                                                                                                                                                                                                                                                                                                                                       |               |
| 38 | Protocol amendments             | 25  | Plans for communicating important protocol modifications (eg, changes to eligibility criteria, outcomes, analyses) to relevant parties (eg, investigators, REC/IRBs, trial participants, trial registries, journals, regulators)                                                                                                      | 17            |
| 39 |                                 |     |                                                                                                                                                                                                                                                                                                                                       |               |
| 40 |                                 |     |                                                                                                                                                                                                                                                                                                                                       |               |
| 41 |                                 |     |                                                                                                                                                                                                                                                                                                                                       |               |
| 42 |                                 |     |                                                                                                                                                                                                                                                                                                                                       |               |
| 43 |                                 |     |                                                                                                                                                                                                                                                                                                                                       |               |
| 44 |                                 |     |                                                                                                                                                                                                                                                                                                                                       |               |
| 45 |                                 |     |                                                                                                                                                                                                                                                                                                                                       |               |
| 46 |                                 |     |                                                                                                                                                                                                                                                                                                                                       |               |
| 47 |                                 |     |                                                                                                                                                                                                                                                                                                                                       |               |
| 48 |                                 |     |                                                                                                                                                                                                                                                                                                                                       |               |
| 49 |                                 |     |                                                                                                                                                                                                                                                                                                                                       |               |

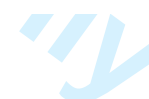

|    |                               |     |                                                                                                                                                                                                                                                                                     |            |
|----|-------------------------------|-----|-------------------------------------------------------------------------------------------------------------------------------------------------------------------------------------------------------------------------------------------------------------------------------------|------------|
| 1  |                               |     |                                                                                                                                                                                                                                                                                     |            |
| 2  |                               |     |                                                                                                                                                                                                                                                                                     |            |
| 3  | Consent or assent             | 26a | Who will obtain informed consent or assent from potential trial participants or authorised surrogates, and how (see Item 32)                                                                                                                                                        | 13         |
| 4  |                               |     |                                                                                                                                                                                                                                                                                     |            |
| 5  |                               |     |                                                                                                                                                                                                                                                                                     |            |
| 6  |                               | 26b | Additional consent provisions for collection and use of participant data and biological specimens in ancillary studies, if applicable                                                                                                                                               | N/A        |
| 7  |                               |     |                                                                                                                                                                                                                                                                                     |            |
| 8  |                               |     |                                                                                                                                                                                                                                                                                     |            |
| 9  | Confidentiality               | 27  | How personal information about potential and enrolled participants will be collected, shared, and maintained in order to protect confidentiality before, during, and after the trial                                                                                                | 18         |
| 10 |                               |     |                                                                                                                                                                                                                                                                                     |            |
| 11 |                               |     |                                                                                                                                                                                                                                                                                     |            |
| 12 | Declaration of interests      | 28  | Financial and other competing interests for principal investigators for the overall trial and each study site                                                                                                                                                                       | 20         |
| 13 |                               |     |                                                                                                                                                                                                                                                                                     |            |
| 14 |                               |     |                                                                                                                                                                                                                                                                                     |            |
| 15 | Access to data                | 29  | Statement of who will have access to the final trial dataset, and disclosure of contractual agreements that limit such access for investigators                                                                                                                                     | N/A        |
| 16 |                               |     |                                                                                                                                                                                                                                                                                     |            |
| 17 |                               |     |                                                                                                                                                                                                                                                                                     |            |
| 18 | Ancillary and post-trial care | 30  | Provisions, if any, for ancillary and post-trial care, and for compensation to those who suffer harm from trial participation                                                                                                                                                       | Supp. PICF |
| 19 |                               |     |                                                                                                                                                                                                                                                                                     |            |
| 20 |                               |     |                                                                                                                                                                                                                                                                                     |            |
| 21 | Dissemination policy          | 31a | Plans for investigators and sponsor to communicate trial results to participants, healthcare professionals, the public, and other relevant groups (eg, via publication, reporting in results databases, or other data sharing arrangements), including any publication restrictions | 18         |
| 22 |                               |     |                                                                                                                                                                                                                                                                                     |            |
| 23 |                               |     |                                                                                                                                                                                                                                                                                     |            |
| 24 |                               |     |                                                                                                                                                                                                                                                                                     |            |
| 25 |                               |     |                                                                                                                                                                                                                                                                                     |            |
| 26 |                               | 31b | Authorship eligibility guidelines and any intended use of professional writers                                                                                                                                                                                                      | N/A        |
| 27 |                               |     |                                                                                                                                                                                                                                                                                     |            |
| 28 |                               | 31c | Plans, if any, for granting public access to the full protocol, participant-level dataset, and statistical code                                                                                                                                                                     | N/A        |
| 29 |                               |     |                                                                                                                                                                                                                                                                                     |            |
| 30 | <b>Appendices</b>             |     |                                                                                                                                                                                                                                                                                     |            |
| 31 |                               |     |                                                                                                                                                                                                                                                                                     |            |
| 32 | Informed consent materials    | 32  | Model consent form and other related documentation given to participants and authorised surrogates                                                                                                                                                                                  | Supp. PICF |
| 33 |                               |     |                                                                                                                                                                                                                                                                                     |            |
| 34 |                               |     |                                                                                                                                                                                                                                                                                     |            |
| 35 | Biological specimens          | 33  | Plans for collection, laboratory evaluation, and storage of biological specimens for genetic or molecular analysis in the current trial and for future use in ancillary studies, if applicable                                                                                      | Supp. PICF |
| 36 |                               |     |                                                                                                                                                                                                                                                                                     |            |
| 37 |                               |     |                                                                                                                                                                                                                                                                                     |            |

38 \*It is strongly recommended that this checklist be read in conjunction with the SPIRIT 2013 Explanation & Elaboration for important clarification on the items.  
 39 Amendments to the protocol should be tracked and dated. The SPIRIT checklist is copyrighted by the SPIRIT Group under the Creative Commons  
 40 "[Attribution-NonCommercial-NoDerivs 3.0 Unported](https://creativecommons.org/licenses/by-nc-nd/3.0/)" license.  
 41

# BMJ Open

## Study protocol for a randomized controlled trial evaluating the effect of prenatal omega-3 LCPUFA supplementation to reduce the incidence of preterm birth: The ORIP trial

|                                 |                                                                                                                                                                                                                                                                                                                                                                                                                                                                                                                                                                                                                                                                                                                                                                                                                                                                                                                     |
|---------------------------------|---------------------------------------------------------------------------------------------------------------------------------------------------------------------------------------------------------------------------------------------------------------------------------------------------------------------------------------------------------------------------------------------------------------------------------------------------------------------------------------------------------------------------------------------------------------------------------------------------------------------------------------------------------------------------------------------------------------------------------------------------------------------------------------------------------------------------------------------------------------------------------------------------------------------|
| Journal:                        | <i>BMJ Open</i>                                                                                                                                                                                                                                                                                                                                                                                                                                                                                                                                                                                                                                                                                                                                                                                                                                                                                                     |
| Manuscript ID                   | bmjopen-2017-018360.R1                                                                                                                                                                                                                                                                                                                                                                                                                                                                                                                                                                                                                                                                                                                                                                                                                                                                                              |
| Article Type:                   | Protocol                                                                                                                                                                                                                                                                                                                                                                                                                                                                                                                                                                                                                                                                                                                                                                                                                                                                                                            |
| Date Submitted by the Author:   | 28-Jul-2017                                                                                                                                                                                                                                                                                                                                                                                                                                                                                                                                                                                                                                                                                                                                                                                                                                                                                                         |
| Complete List of Authors:       | Zhou, Shao; South Australian Health and Medical Research Institute, Healthy Mothers Babies and Children; University of Adelaide , School of Agriculture, Food & Wine<br>Best, Karen; South Australian Health and Medical Research Institute, Healthy Mothers, Babies and Children; University of Adelaide, Discipline of Paediatrics<br>Gibson, Robert; University of Adelaide School of Agriculture Food and Wine, FOODplus Research Centre<br>McPhee, Andrew; Women's and Children's Hospital, Department of Neonatal Medicine<br>Yelland, Lisa; South Australian Health and Medical Research Institute, Healthy Mothers Babies & Children; University of Adelaide, School of Public Health<br>Quinlivan, Julie; University of Notre Dame Australia, University of Notre Dame<br>Makrides, Maria; South Australian Health and Medical Research Institute, HMBC; University of Adelaide, Discipline of Paediatrics |
| <b>Primary Subject Heading</b>: | Obstetrics and gynaecology                                                                                                                                                                                                                                                                                                                                                                                                                                                                                                                                                                                                                                                                                                                                                                                                                                                                                          |
| Secondary Subject Heading:      | Paediatrics, Nutrition and metabolism, Public health                                                                                                                                                                                                                                                                                                                                                                                                                                                                                                                                                                                                                                                                                                                                                                                                                                                                |
| Keywords:                       | PREVENTIVE MEDICINE, PREGNANCY, PRETERM BIRTH, OMEGA-3 LONG CHAIN POLYUNSATURATED FATTY ACIDS, docosahexaenoic acid, MATERNAL DIET                                                                                                                                                                                                                                                                                                                                                                                                                                                                                                                                                                                                                                                                                                                                                                                  |
|                                 |                                                                                                                                                                                                                                                                                                                                                                                                                                                                                                                                                                                                                                                                                                                                                                                                                                                                                                                     |

SCHOLARONE™  
Manuscripts

1  
2  
3  
4  
5  
6  
7

## Study protocol for a randomized controlled trial evaluating the effect of prenatal omega-3 LCPUFA supplementation to reduce the incidence of preterm birth: The ORIP trial

Shao J Zhou<sup>1,2\*</sup>, Karen Best<sup>1,3\*</sup>, Robert Gibson<sup>2,5</sup>, Andrew McPhee<sup>4</sup>, Lisa Yelland<sup>1,6</sup>, Julie Quinlivan<sup>7</sup>, Maria Makrides<sup>1,3</sup>

8  
9  
\*Joint first authors

10  
11  
12

### Corresponding Author

13  
14  
Professor Maria Makrides

15  
16  
South Australian Health and Medical Research Institute, North Terrace, Adelaide

17  
18  
South Australia, Australia 5000

19  
20  
Maria.makrides@sahmri.com

21  
22  
61 08 8128 4416

23  
24  
25  
26

### Author details

27  
28  
29  
30  
<sup>1</sup> Healthy Mothers, Babies and Children, South Australian Health and Medical Research Institute, Adelaide, South Australia, Australia.

31  
32  
33  
<sup>2</sup> School of Agriculture, Food and Wine, The University of Adelaide, Adelaide, South Australia, Australia.

34  
35  
36  
<sup>3</sup> Discipline of Paediatrics, School of Medicine, The University of Adelaide, Adelaide, South Australia, Australia.

37  
38  
39  
<sup>4</sup> Neonatal Services, Women's and Children's Health Network, Adelaide, South Australia, Australia.

40  
41  
<sup>5</sup> FOODplus Research Centre, The University of Adelaide, South Australia, Australia.

42  
43  
<sup>6</sup> School of Public Health, The University of Adelaide, Adelaide, South Australia, Australia.

44  
45  
46  
<sup>7</sup> Institute for Health Research, University of Notre Dame Australia, Fremantle, Western Australia, Australia

47  
48  
49  
\*Shao J Zhou and Karen Best contributed equally to this paper

50  
51  
52  
**Word count** = 4524

53  
54  
55  
56  
**Keywords:** Pregnancy, preterm birth, premature birth, docosahexaenoic acid, omega-3 long chain polyunsaturated fatty acids, prevention, maternal diet

## Abbreviations

AA, arachidonic acid; ACTRN, Australia and New Zealand Clinical Trial Registry; CRF, case report form; DOMInO, DHA to Optimise Mother and Infant Outcome; DHA, docosahexaenoic acid; DMAC, data management and analysis centre; EPTB, Early preterm birth; EPA, eicosapentaenoic acid; EDD, estimated date of delivery; GA, gestational age; Good Clinical Practice; GMP, code of good manufacturing practice; HREC, Human Research Ethics Committee; ID, Identifier; LA, linoleic acid; LCPUFA, long-chain polyunsaturated fatty acids; mg, milligram;  $\omega$ -3, omega-3;  $\omega$ -6, omega-6; ORIP, the acronym is derived from 'Omega-3 fatty acids to reduce the incidence of prematurity'; NHMRC, National Health and Medical Research Council of Australia; RR, Relative Risk; SAE, Serious Adverse Event.



**ABSTRACT**

**Introduction:** Preterm birth accounts for more than 85% of all perinatal complications and deaths. Seventy-five percent of early preterm births occur spontaneously and without identifiable risk factors. The need for a broadly applicable, effective strategy for primary prevention is paramount. Secondary outcomes from the Docosahexaenoic Acid (DHA) to Optimize Mother Infant Outcome (DOMInO) trial showed that maternal supplementation until delivery with omega-3 long chain polyunsaturated fatty acid (LCPUFA), predominantly as DHA, resulted in a 50% reduction in the incidence of early preterm birth, but also an increase in the incidence of post-term induction or post-term pre-labour caesarean section due to extended gestation. We aim to determine the effectiveness of supplementing the maternal diet with omega-3 LCPUFA until 34 weeks' gestation on the incidence of early preterm birth.

**Methods and analysis:** This is a multicentre, parallel group, randomised, blinded and controlled trial. Women less than 20 weeks' gestation with a singleton or multiple pregnancy and able to give informed consent are eligible to participate. Women will be randomised to receive high DHA fish oil capsules or control capsules without DHA. Capsules will be taken from enrolment until 34 weeks' gestation. The primary outcome is the incidence of early preterm birth, defined as delivery before 34 completed weeks' gestation. Key secondary outcomes include length of gestation, incidence of post-term induction or pre-labour caesarean section and spontaneous early preterm birth. The target sample size is 5540 women (2770 per group), which will provide 85 % power to detect an absolute reduction in the incidence of preterm birth of 1.16% (from 2.45% to 1.29%) between the DHA and control group (two sided  $\alpha = 0.05$ ). The primary analysis will be based on the intention-to-treat principle.

**Trial Registration:** Australia and New Zealand Clinical Trial Registry Number:  
2613001142729

## INTRODUCTION

### Background

Preterm birth, or birth before 37 completed weeks of pregnancy, is the leading cause of death in newborns, accounting for more than 85% of all perinatal complications and death.<sup>1</sup> It is estimated that 10% of births (13 million babies each year worldwide) are preterm and 20% of these preterm births occur before 34 weeks, these being referred to as early preterm birth (EPTB). It is EPTB that is the major cause of perinatal mortality, serious neonatal morbidity and moderate to severe childhood disability in developed countries.<sup>2-4</sup> Effective, broadly applicable primary prevention strategies to reduce the risk of EPTB are lacking.

Prostaglandins and other lipid mediators derived from omega-6 ( $\omega$ -6) and omega-3 ( $\omega$ -3) fatty acids play essential roles in normal and pathologic initiation of labour.<sup>5,6</sup> The fetoplacental unit is supplied with long chain polyunsaturated fatty acids (LCPUFA) from the maternal circulation, which is influenced by maternal LCPUFA intake and endogenous synthesis.

Prostaglandins derived from  $\omega$ -6 arachidonic acid (AA) are countered by those derived from  $\omega$ -3 LCPUFA within the same tissues. The balance between the metabolites of  $\omega$ -3 and  $\omega$ -6 fatty acids plays an important role in the maintenance of normal gestation length and is a critical element in cervical ripening and the initiation of labour.<sup>7</sup> If local production of  $\omega$ -6 derived prostaglandins within the fetoplacental unit is too high, or local accumulation of  $\omega$ -3 LCPUFA is too low, the cervix may prematurely ripen and uterine contractions increase, which may in turn lead to preterm birth or EPTB.

Current Western diets are low in  $\omega$ -3 LCPUFA.<sup>8</sup> The World Health Organization recommends an intake of 300 mg/d of  $\omega$ -3 LCPUFA for pregnant women, however, the median intake in Australian women of child bearing age is only 29 mg/day<sup>9</sup> compared with 1000mg/d in women from nations with high-fish consumption such as Japan, Korea and Norway. The intake of  $\omega$ -3 LCPUFA is further reduced among pregnant women due to a reduced intake of all fish

1  
2 following advisories for pregnant women to avoid specific long-lived predatory fish due to the  
3 concern about mercury contamination.<sup>10</sup> The level of  $\omega$ -3 LCPUFA intake estimated to achieve  
4 normal rises in the fetoplacental unit for the maintenance of a full term pregnancy is well  
5 above the intake of many pregnant women, highlighting a potential insufficiency for the uterus  
6 and fetoplacental unit. Optimising  $\omega$ -3 LCPUFA intake in pregnancy may restore the balance  
7 between  $\omega$ -3 and  $\omega$ -6 fatty acids and reduce the risk of preterm birth.  
8  
9

10  
11  
12  
13  
14  
15  
16  
17 At the time the trial commenced, only 2 of the 6 included trials in the Cochrane review<sup>11</sup> of  
18 marine oil supplementation in pregnancy reported the effect on EPTB. Both trials<sup>12 13</sup> were  
19 conducted in high risk pregnancies designed to assess the effect of  $\omega$ -3 LCPUFA  
20 supplementation to prevent reoccurrence of intrauterine growth restriction, preterm birth or  
21 pregnancy induced hypertension. From these two relatively small trials (total of 860 women), it  
22 was seen that women allocated to receive fish oil had a lower risk of EPTB compared with  
23 control (relative risk (RR) 0.69, 95% CI 0.49 to 0.99). Systematic reviews<sup>11 14 15</sup> have shown no  
24 difference in the incidence of antepartum hospitalisation, caesarean section, eclampsia or other  
25 serious maternal morbidity between treatment ( $\omega$ -3 LCPUFA supplements) and control groups.  
26  
27 The relative risk of miscarriage, stillbirth and neonatal death also did not differ between the  
28 groups<sup>11 14 15</sup>. None of the included trials reported the effect of  $\omega$ -3 LCPUFA supplementation  
29 on EPTB in the general population of pregnant women.  
30  
31  
32  
33  
34  
35  
36  
37  
38  
39  
40  
41  
42  
43

44  
45 The strongest evidence to support the efficacy of  $\omega$ -3 LCPUFA supplementation to reduce  
46 EPTB comes from our Docosahexaenoic Acid [DHA] to Optimize Mother Infant Outcome  
47 [DOMInO] trial<sup>16</sup>, the largest trial to date of  $\omega$ -3 LCPUFA supplementation in pregnancy.  
48  
49  
50  
51  
52  
53  
54  
55  
56  
57  
58  
59  
60  
61  
62  
63  
64  
65  
66  
67  
68  
69  
70  
71  
72  
73  
74  
75  
76  
77  
78  
79  
80  
81  
82  
83  
84  
85  
86  
87  
88  
89  
90  
91  
92  
93  
94  
95  
96  
97  
98  
99  
100  
101  
102  
103  
104  
105  
106  
107  
108  
109  
110  
111  
112  
113  
114  
115  
116  
117  
118  
119  
120  
121  
122  
123  
124  
125  
126  
127  
128  
129  
130  
131  
132  
133  
134  
135  
136  
137  
138  
139  
140  
141  
142  
143  
144  
145  
146  
147  
148  
149  
150  
151  
152  
153  
154  
155  
156  
157  
158  
159  
160  
161  
162  
163  
164  
165  
166  
167  
168  
169  
170  
171  
172  
173  
174  
175  
176  
177  
178  
179  
180  
181  
182  
183  
184  
185  
186  
187  
188  
189  
190  
191  
192  
193  
194  
195  
196  
197  
198  
199  
200  
201  
202  
203  
204  
205  
206  
207  
208  
209  
210  
211  
212  
213  
214  
215  
216  
217  
218  
219  
220  
221  
222  
223  
224  
225  
226  
227  
228  
229  
230  
231  
232  
233  
234  
235  
236  
237  
238  
239  
240  
241  
242  
243  
244  
245  
246  
247  
248  
249  
250  
251  
252  
253  
254  
255  
256  
257  
258  
259  
260  
261  
262  
263  
264  
265  
266  
267  
268  
269  
270  
271  
272  
273  
274  
275  
276  
277  
278  
279  
280  
281  
282  
283  
284  
285  
286  
287  
288  
289  
290  
291  
292  
293  
294  
295  
296  
297  
298  
299  
300  
301  
302  
303  
304  
305  
306  
307  
308  
309  
310  
311  
312  
313  
314  
315  
316  
317  
318  
319  
320  
321  
322  
323  
324  
325  
326  
327  
328  
329  
330  
331  
332  
333  
334  
335  
336  
337  
338  
339  
340  
341  
342  
343  
344  
345  
346  
347  
348  
349  
350  
351  
352  
353  
354  
355  
356  
357  
358  
359  
360  
361  
362  
363  
364  
365  
366  
367  
368  
369  
370  
371  
372  
373  
374  
375  
376  
377  
378  
379  
380  
381  
382  
383  
384  
385  
386  
387  
388  
389  
390  
391  
392  
393  
394  
395  
396  
397  
398  
399  
400  
401  
402  
403  
404  
405  
406  
407  
408  
409  
410  
411  
412  
413  
414  
415  
416  
417  
418  
419  
420  
421  
422  
423  
424  
425  
426  
427  
428  
429  
430  
431  
432  
433  
434  
435  
436  
437  
438  
439  
440  
441  
442  
443  
444  
445  
446  
447  
448  
449  
450  
451  
452  
453  
454  
455  
456  
457  
458  
459  
460  
461  
462  
463  
464  
465  
466  
467  
468  
469  
470  
471  
472  
473  
474  
475  
476  
477  
478  
479  
480  
481  
482  
483  
484  
485  
486  
487  
488  
489  
490  
491  
492  
493  
494  
495  
496  
497  
498  
499  
500  
501  
502  
503  
504  
505  
506  
507  
508  
509  
510  
511  
512  
513  
514  
515  
516  
517  
518  
519  
520  
521  
522  
523  
524  
525  
526  
527  
528  
529  
530  
531  
532  
533  
534  
535  
536  
537  
538  
539  
540  
541  
542  
543  
544  
545  
546  
547  
548  
549  
550  
551  
552  
553  
554  
555  
556  
557  
558  
559  
560  
561  
562  
563  
564  
565  
566  
567  
568  
569  
570  
571  
572  
573  
574  
575  
576  
577  
578  
579  
580  
581  
582  
583  
584  
585  
586  
587  
588  
589  
590  
591  
592  
593  
594  
595  
596  
597  
598  
599  
600  
601  
602  
603  
604  
605  
606  
607  
608  
609  
610  
611  
612  
613  
614  
615  
616  
617  
618  
619  
620  
621  
622  
623  
624  
625  
626  
627  
628  
629  
630  
631  
632  
633  
634  
635  
636  
637  
638  
639  
640  
641  
642  
643  
644  
645  
646  
647  
648  
649  
650  
651  
652  
653  
654  
655  
656  
657  
658  
659  
660  
661  
662  
663  
664  
665  
666  
667  
668  
669  
670  
671  
672  
673  
674  
675  
676  
677  
678  
679  
680  
681  
682  
683  
684  
685  
686  
687  
688  
689  
690  
691  
692  
693  
694  
695  
696  
697  
698  
699  
700  
701  
702  
703  
704  
705  
706  
707  
708  
709  
710  
711  
712  
713  
714  
715  
716  
717  
718  
719  
720  
721  
722  
723  
724  
725  
726  
727  
728  
729  
730  
731  
732  
733  
734  
735  
736  
737  
738  
739  
740  
741  
742  
743  
744  
745  
746  
747  
748  
749  
750  
751  
752  
753  
754  
755  
756  
757  
758  
759  
760  
761  
762  
763  
764  
765  
766  
767  
768  
769  
770  
771  
772  
773  
774  
775  
776  
777  
778  
779  
780  
781  
782  
783  
784  
785  
786  
787  
788  
789  
790  
791  
792  
793  
794  
795  
796  
797  
798  
799  
800  
801  
802  
803  
804  
805  
806  
807  
808  
809  
810  
811  
812  
813  
814  
815  
816  
817  
818  
819  
820  
821  
822  
823  
824  
825  
826  
827  
828  
829  
830  
831  
832  
833  
834  
835  
836  
837  
838  
839  
840  
841  
842  
843  
844  
845  
846  
847  
848  
849  
850  
851  
852  
853  
854  
855  
856  
857  
858  
859  
860  
861  
862  
863  
864  
865  
866  
867  
868  
869  
870  
871  
872  
873  
874  
875  
876  
877  
878  
879  
880  
881  
882  
883  
884  
885  
886  
887  
888  
889  
890  
891  
892  
893  
894  
895  
896  
897  
898  
899  
900  
901  
902  
903  
904  
905  
906  
907  
908  
909  
910  
911  
912  
913  
914  
915  
916  
917  
918  
919  
920  
921  
922  
923  
924  
925  
926  
927  
928  
929  
930  
931  
932  
933  
934  
935  
936  
937  
938  
939  
940  
941  
942  
943  
944  
945  
946  
947  
948  
949  
950  
951  
952  
953  
954  
955  
956  
957  
958  
959  
960  
961  
962  
963  
964  
965  
966  
967  
968  
969  
970  
971  
972  
973  
974  
975  
976  
977  
978  
979  
980  
981  
982  
983  
984  
985  
986  
987  
988  
989  
990  
991  
992  
993  
994  
995  
996  
997  
998  
999  
1000

1  
2 fish oil concentrate (900 mg  $\omega$ -3 LCPUFA/day) or a blend of vegetable oils (no  $\omega$ -3 LCPUFA)  
3  
4 from 20 weeks' gestation until birth. In a pre-specified secondary analysis, there were fewer  
5  
6 EPTB in the  $\omega$ -3 LCPUFA supplemented group compared with control (1.09% vs. 2.25%,  
7  
8 adjusted RR 0.49, 95% CI 0.25 to 0.94,  $p=0.03$ ) and fewer admissions to level three intensive  
9  
10 care (1.75% vs. 3.08%, RR 0.57, 95% CI 0.34 to 0.97,  $p=0.04$ ). Similar findings were reported  
11  
12 in a smaller US trial (n=301), the Kansas University DHA Outcomes (KUDOS) Study<sup>17</sup>, which  
13  
14 showed that supplementation with 600 mg of DHA daily from mid-pregnancy until birth  
15  
16 resulted in a reduction in the incidence of EPTB (0.6% vs. 4.8%,  $p=0.025$ ). The effect of DHA  
17  
18 supplementation in pregnancy in lowering the risk of EPTB observed in both the DOMInO and  
19  
20 KUDOS trials is consistent with the Cochrane review<sup>18</sup> published before these two trials.  
21  
22 Despite these encouraging findings, results have been viewed with caution by researchers and  
23  
24 clinicians because EPTB was a secondary outcome of the DOMInO and KUDOS trials. A  
25  
26 recent update to this Cochrane review (publication pending) includes 54 randomised trials with  
27  
28 a total of >15,000 participants. Results show a clear reduction in EPTB (RR 0.61, 95% CI 0.46  
29  
30 to 0.81; 9 RCTs; n = 4351) for supplementation compared with placebo<sup>19</sup>. Our DOMInO trial  
31  
32 supports the safety data from previous systematic reviews, however there were more post-term  
33  
34 births requiring obstetric intervention (induction or caesarean section) in the  $\omega$ -3 LCPUFA  
35  
36 supplemented group compared with control (17.59% vs. 13.72%, adjusted RR 1.28, 95% CI  
37  
38 1.06 to 1.54,  $p=0.01$ ). To determine both efficacy and safety of this intervention, we therefore  
39  
40 plan to undertake a further trial with adequate power to assess the effect of  $\omega$ -3 LCPUFA  
41  
42 supplementation in pregnancy on EPTB as the primary outcome, with a unique design ceasing  
43  
44 the intervention at 34 weeks' gestation to reduce the risk of post-term birth.  
45  
46  
47  
48  
49  
50

## 51 Hypotheses

52  
53  
54  
55 Optimising  $\omega$ -3 LCPUFA intake in pregnancy will lead to lower risk of EPTB.  
56  
57  
58  
59  
60

## METHODS

### Trial design

The ORIP trial is designed as a randomised, controlled, clinician, researcher and participant/family blinded, multicentre trial with two parallel groups and a primary outcome of incidence of EPTB, defined as delivery before 34 completed weeks' gestation.

### Participating Centres

The sponsoring institution and Trial Coordinating Centre is the South Australian Health and Medical Research Institute based at the Women's and Children's Hospital, Adelaide, South Australia. The trial is being conducted in the following six centres in Australia: Women's & Children's Hospital, Flinders Medical Centre and Lyell McEwin Hospital in South Australia; Joondalup Health Campus, Western Australia; Werribee Mercy Hospital, Werribee, Victoria; and Mater Mothers Hospital, Brisbane, Queensland.

### Study Population

Participants are pregnant women less than 20 weeks' gestation.

### Eligibility Criteria

Pregnant women are approached by trained clinical trial personnel in the antenatal clinic of participating centres.

#### *Inclusion Criteria*

Women must meet both the following criteria to be enrolled in this study:

- Singleton or multiple pregnancy and less than 20 weeks' gestation.
- Able to give informed consent.

#### *Exclusion criteria*

Women must not have any of the following criteria to be enrolled in this study:

- Fetus with a known abnormality.
- Taking dietary supplements containing LCPUFA > 150mg/day.
- Taking dietary supplements containing LCPUFA  $\leq$ 150mg/day and are not willing to stop.
- Bleeding disorders where fish oil is contraindicated or on anticoagulant therapy.
- History of drug or alcohol abuse.

### Study treatments

Participating women will be randomised to high-DHA fish oil capsules or vegetable oil capsules. The study capsules are identical in colour, size, shape and packaging and are iso-caloric. Women will be asked to consume three capsules per day.

#### *DHA Capsules*

Each 500mg DHA enriched fish oil capsule contains approximately 300mg of  $\omega$ -3 LCPUFA. Women will be asked to take three capsules per day orally, which will provide approximately 1g of  $\omega$ -3 LCPUFA (800mg of DHA and 100 mg of eicosapentaenoic acid [EPA]) per day. The remaining portion of oil consists of monounsaturated and saturated fatty acids.

#### *Control Capsules*

The control capsules (also 500mg in weight) contain a blend of vegetable oils (canola, sunflower and palm oils) with a trace of tuna oil (12.6mg  $\omega$ -3 LCPUFA) to assist with blinding. This blend of oil matches the fatty acid composition of the typical Australian diet.

#### *Manufacture of study capsules*

The active and control capsules are manufactured in a licensed facility (licensed according to the Code of Good Manufacturing Practice (GMP)) and have been donated to the trial by Efamol Ltd/Wassen International Ltd. The capsules are packaged and labelled in accordance with GMP including an individual product identifier (ID), batch number, expiry date and the statement “for clinical trial use only”. The pharmacist or the investigator’s designee maintain

1  
2 accurate records of the receipt of all study capsules, including dates of receipt. Unused study  
3 capsules will be destroyed in compliance with applicable regulations.  
4  
5

### 6 7 **Monitoring adherence to study treatment**

8  
9  
10 Research personnel in each centre will maintain regular contact with participating women to  
11 monitor and encourage capsule adherence and study compliance and answer any questions as  
12 they arise. Women are asked to return unused capsules at the final study visit (34 weeks'  
13 gestation) and the proportion of capsules returned serves as an additional measure of  
14 compliance. A finger prick blood specimen collected from the woman at this final visit will be  
15 used in fatty acid analysis as an independent biomarker of adherence. All clinical care for  
16 women involved in this trial will be undertaken by her designated obstetric/midwifery care  
17 provider.  
18  
19  
20  
21  
22  
23  
24  
25  
26  
27  
28

### 29 **Outcome Measures**

30  
31  
32 The primary outcome of this trial is the incidence of EPTB, defined as delivery before 34  
33 completed weeks' gestation. Gestational age (GA) in days at delivery for primary and  
34 secondary outcomes will be determined from the estimated date of delivery (EDD) using the  
35 equation  $[280 - (EDD - \text{date of birth})]$ . EDD will be determined using a combination of  
36 maternal menstrual dating and ultrasound dating in accordance with established obstetric  
37 practice, as outlined in Figure 1.  
38  
39  
40  
41  
42  
43  
44  
45

46 Key Secondary outcomes:

- 47 • Length of gestation
- 48 • Post-term induction or post-term pre-labour caesarean section
- 49 • Preterm birth (<37 completed weeks)
- 50 • Spontaneous EPTB,
- 51 • Birth weight
- 52 • Low birth weight (< 2500g).
- 53
- 54
- 55
- 56
- 57
- 58
- 59
- 60

- Admission to Neonatal Intensive Care Unit
- Perinatal Death (stillbirth and death within first 28 days of birth)

#### Other Outcomes

- Spontaneous preterm birth, pre-labour rupture of membranes, pre-labour, preterm rupture of membranes.
- Birth length, birth head circumference, small for GA, very small for GA, large for GA, very large for GA.
- The length of hospital stay of infants and mothers, length of admission in Neonatal Intensive Care Unit.
- Pregnancy and labour outcomes including; gestational diabetes, pregnancy induced hypertension, pre-eclampsia, eclampsia, maternal use of antibiotics, caesarean section, estimated blood loss at birth and post-partum haemorrhage.
- Incidence of Serious Adverse Event (SAE) defined as; maternal, neonatal or fetal deaths (still birth); fetal loss (miscarriage); maternal admissions to intensive care; admissions to intensive care for infants born after 34 weeks' gestation; and major congenital anomalies.
- Neonatal complications including jaundice (requiring phototherapy), hypoglycaemia (requiring intravenous dextrose infusion), neonatal convulsion, brain injury (including intra-ventricular haemorrhage), retinopathy of prematurity, sepsis, necrotising enterocolitis and duration of supplemental oxygen. The definitions and classifications of these neonatal complications are in accordance with the Australian and New Zealand Neonatal Network Data Dictionary.<sup>20</sup>
- Other side effects and tolerability of DHA supplementation assessed through data collected in the case report form.



## Participant Timeline

Women will be randomised and commence study treatment capsules from enrolment (<20 weeks' gestation) until 34 weeks' gestation or birth, whichever occurs first. At enrolment, following informed consent and prior to commencement of study treatment, research personnel will collect a finger prick blood sample for baseline fatty acid status. The woman's height and weight will be measured and baseline clinical and demographic data collected. Research personnel will contact the participant two weeks following the enrolment visit and again when the woman is 28 weeks' gestation to ascertain capsule adherence and record adverse events. At 34 weeks' gestation participating women will attend a clinic appointment for collection of a finger prick blood sample for fatty acid analysis and unused capsules are returned and counted. Six weeks following delivery, research personnel will extract details of pregnancy, labour and birth from the woman and her baby's medical records for primary and secondary outcome data; see Figure 2 for a summary of the ORIP trial schema.

## Sample Size

Our previous trial of DHA supplementation of pregnant women, the DOMInO trial<sup>16</sup>, included women with singleton pregnancies and treatment resulted in a 1.16% absolute reduction (from 2.25% to 1.09%) in the incidence of EPTB. This reduction occurred in the presence of non-adherence resulting from women assigned to the intervention failing to take the trial supplements as directed, and control women taking prenatal supplements containing low dose  $\omega$ -3 LCPUFA. Similar levels of non-adherence are expected in the ORIP trial. Inclusion of women with multiple pregnancies in the ORIP trial is expected to result in a small increase in the incidence of EPTB in both treatment groups, since EPTB is more common in multiple pregnancies. To demonstrate an absolute reduction in the incidence of EPTB of 1.16% (from 2.45% to 1.29%) with 85% power and overall two-sided alpha=0.05 (alpha=0.049 at the final analysis), a sample size of 2631 per group (i.e. 5262 total) is required. Allowing for a loss to follow up of 5%, a total of 5540 women is required to ensure adequate power for the primary

1  
2 outcome. Since EPTB is a mother level outcome, the sample size calculations define the  
3 number of mothers that should be recruited and no adjustment for clustering due to multiple  
4 pregnancies is required for this outcome.  
5  
6  
7

### 8 9 10 **Recruitment**

11  
12 Women will be approached to enter the trial by research staff at the time of attending their  
13 routine antenatal visit at one of the centres involved. Pregnant women will also be informed  
14 about the trial by display of approved advertising material which will be circulated in hard  
15 copy and via social media avenues. A participant information sheet describing the purpose of  
16 the study, the procedures to be followed, and the risks and benefits of participation will be  
17 explained to interested women. Following a screening process to ensure inclusion and  
18 exclusion criteria are met, the investigator, or nominee will conduct the informed consent  
19 discussion and will check that information provided is understood and answer any questions  
20 about the study. A record of all women screened and their enrolment status will be maintained  
21 to adhere to the consolidated standards for the reporting of randomised controlled trials.<sup>21</sup>  
22  
23

24 Women may withdraw their involvement in the trial at any time and wherever possible the  
25 reason for withdrawal will be recorded.  
26  
27  
28  
29  
30  
31  
32  
33

### 34 35 36 37 38 39 40 **Randomisation procedures**

41  
42 Once the consent process has been documented by signing of the written consent form, the  
43 participant will be randomised using a web-based randomisation service. Stratification will be  
44 by centre and current supplement use (no LCPUFA vs  $\leq 150$ mg LCPUFA/day prior to  
45 randomisation). Allocation follows a computer-generated randomisation schedule with  
46 balanced variable blocks, prepared using ralloc.ado version 3.7.5 in Stata version 12.1 by an  
47 independent statistician who is not involved with trial participants or data analysis. A unique  
48 six-digit study ID and a study pack with a unique product ID are assigned. The study ID  
49  
50  
51  
52  
53  
54  
55  
56  
57  
58  
59  
60

1  
2 identifies the randomised woman and the product ID identifies a pack of five bottles of either  
3  
4 active or control capsules, pre-packaged corresponding to the randomisation schedule.  
5  
6

### 7 8 **Blinding**

9  
10 Participants and their family, care providers, data collectors, outcome assessors, research  
11  
12 personnel and data analysts will all be blinded to randomisation group. The intervention and  
13  
14 control capsules are identical in shape, size, colour, packaging and labelling and uniquely  
15  
16 identified only by the product ID. In the DOMInO trial, we identified that more women in the  
17  
18 intervention group correctly guessed their group allocation. We therefore added a small amount  
19  
20 of tuna oil (5%) to the control capsules to enhance blinding of study participants. The  
21  
22 randomisation code for an individual participant may be un-blinded in an emergency if the Site  
23  
24 Investigator decides a participant cannot be adequately treated without knowing their study  
25  
26 treatment allocation. The Principal Investigator will be notified and must contact the Data  
27  
28 Management and Analysis Centre, where the randomisation list is securely stored. The time,  
29  
30 date, study ID of the participant and reason for un-blinding must be documented and events  
31  
32 leading to the emergency un-blinding will be recorded.  
33  
34  
35  
36  
37

### 38 **Data collection and trial management**

39  
40 A purpose-built web-based clinical trial management information system (CTMS) with  
41  
42 password protection and defined user-level access is used to facilitate trial management. A  
43  
44 record of all women approached, screened for eligibility, and consented is recorded in real time  
45  
46 in the CTMS. Once consented and randomised, the CTMS automatically calculates study  
47  
48 milestones for each participant. This information is readily available for clinical trial staff to  
49  
50 enable scheduling of appointments and sample collection. Data entered by individual study  
51  
52 centres is routinely scrutinized by the Coordinating Centre to monitor protocol adherence and  
53  
54 study progress. Summary reports including screening data, enrolment, appointment attendance,  
55  
56 sample collection, serious adverse events and study completion are generated from the CTMS  
57  
58  
59  
60

1  
2 and reviewed at monthly trial steering committee meetings. Site monitoring visits to ensure  
3 compliance with good clinical practice and the study protocol are conducted at site start-up and  
4 then six monthly or as required to ensure the integrity of the trial.  
5  
6  
7

8  
9  
10 Data are collected by trained clinical trial staff at each participating centre onto carbon copy  
11 paper case report forms (CRF). Carbon copies of the completed CRF remain on site at  
12 participating centres with original copies being mailed to the Data Management and Analysis  
13 Centre at the University of Adelaide for data management including data entry and data  
14 cleaning. Data validity checks are completed by data entry personnel and data queries posted to  
15 the CTMS for resolution by participating centres. Data queries generated by statisticians during  
16 regular blinded reviews of data quality and batch checks are also managed through the CTMS.  
17  
18 Electronic data are stored on secure servers at the Data Management and Analysis Centre and  
19 released only to persons authorised to receive those data. Following study completion, copies  
20 of study documents are retained at each study site or in archives. Documents held at the  
21 Coordinating Centre will be retained for at least 30 years after study completion in line with  
22 the data retention schedules for research involving minors<sup>22</sup>. At the completion of this time,  
23 documentation will be destroyed using confidential document disposal. Electronic data will be  
24 stored indefinitely on secure servers with access only granted to authorised study personnel.  
25  
26  
27  
28  
29  
30  
31  
32  
33  
34  
35  
36  
37  
38  
39  
40  
41

## 42 **Statistical methods**

43  
44 All participants will be analysed according to the group to which they were randomised  
45 (intention-to-treat principle) for the primary analysis. The primary outcome of EPTB will be  
46 compared between intervention and control groups using a log binomial regression model.  
47  
48 Adjustment will be made for the stratification variables centre and supplements, and results  
49 will be presented as a relative risk with confidence interval and 2-sided p-value. Statistical  
50 significance will be assessed at an alpha of 0.049 to account for the pre-specified interim  
51 analysis (see below) using the O'Brien-Fleming approach. Key secondary and other outcomes  
52  
53  
54  
55  
56  
57  
58  
59  
60

1  
2 will be compared between treatment groups using log binomial regression models for binary  
3  
4 outcomes and linear regression models for continuous outcomes with no adjustment for  
5  
6 multiple comparisons. Clustering due to multiple pregnancies and repeat participation in the  
7  
8 trial will be taken into account where applicable using generalised estimating equations.  
9  
10 Secondary analyses will be performed for the primary outcome and related key secondary and  
11  
12 other outcomes to test for evidence of effect modification by pregnancy status (single vs  
13  
14 multiple pregnancy), history of preterm birth and baseline DHA. Missing data will be  
15  
16 addressed using multiple imputation under a missing at random assumption. Sensitivity  
17  
18 analyses will be performed using the original un-imputed data. A secondary per-protocol  
19  
20 analysis will be performed for the primary outcome including only women who were  
21  
22 compliant with the protocol. Two separate definitions of compliance will be used. First,  
23  
24 women will be considered compliant if they returned their remaining capsules at the end of the  
25  
26 trial and consumed at least 75% of the number of capsules expected to be consumed. Second,  
27  
28 women will be considered compliant if they had the 28-week telephone contact and reported  
29  
30 they had missed less than 7 capsules in the last week out of the recommended 21 capsules.  
31  
32  
33  
34  
35

36 All analyses will follow a pre-specified statistical analysis plan. There is a single planned  
37  
38 interim analysis of the primary outcome to be performed after data collection is complete for  
39  
40 the first 50% of the target number of randomized participants.  
41  
42  
43

#### 44 **Data monitoring**

45  
46 An independent Data Monitoring Committee (DMC) has been set up to review the progress of  
47  
48 the trial and provide feedback to the Trial Steering Committee. The DMC reviews general  
49  
50 study progress (recruitment, compliance, loss to follow-up), the EPTB event rate and key  
51  
52 secondary/safety outcomes. The committee meets annually or as required and consists of a  
53  
54 neonatologist, obstetrician and statistician with clinical trials expertise. The DMC will be  
55  
56 responsible for reviewing the results of the interim analysis.  
57  
58  
59  
60

1  
2 An independent (blinded) SAE Committee has been established to review SAEs. There are no  
3  
4 SAEs which would be anticipated as a unique consequence of participation in the trial,  
5  
6 however all deaths, admissions to an intensive care unit of mothers or of infants born after 34  
7  
8 completed weeks' gestation, and major congenital abnormalities are to be reported. The SAE  
9  
10 Committee includes experts in obstetrics, neonatology, pathology and midwifery who are not  
11  
12 involved in the trial. The primary role of the SAE Committee is to review all SAEs and  
13  
14 determine whether there is any likelihood that involvement in the trial could have contributed  
15  
16 to the event. Determinations of causality will be made from medical records retrieved for this  
17  
18 purpose. This committee meets quarterly, or as required.  
19  
20  
21

## 22 23 **ETHICS AND DISSEMINATION**

### 24 25 26 **Research ethics approval**

27  
28 This protocol and the informed consent and participant information document have been  
29  
30 approved by the Human Research Ethics Committee (HREC) of each study site. Women's and  
31  
32 Children's Health Network HREC (Coordinating HREC & Women's and Children's Hospital,  
33  
34 Adelaide; Southern Adelaide Clinical HREC, Adelaide, South Australia); Mercy Health HREC  
35  
36 (Werribee Mercy Hospital, Werribee, Victoria); Mater Mothers' Hospital, Brisbane,  
37  
38 Queensland), University of Notradame, Joondalup Health Campus, Joondalup, Western  
39  
40 Australia. Any subsequent modifications will be reviewed and approved by the HREC and  
41  
42 governance of each study site. The study will be conducted in compliance with the current  
43  
44 approved version of the protocol. Any change to the protocol document or informed consent  
45  
46 form that affects the scientific intent, study design, patient safety, or may affect a participant's  
47  
48 willingness to continue participation in the study will be considered a major amendment. All  
49  
50 such amendments will be submitted to the HREC for approval. Any other changes to the  
51  
52 protocol (such as administrative changes to dates and study personnel) will be considered  
53  
54 minor amendments and will be notified to the HREC as appropriate. Study findings will be  
55  
56  
57  
58  
59  
60

1  
2 disseminated via peer-reviewed publication, conference presentations, informing participants  
3  
4 with a lay summary and the wider community through social media.  
5  
6  
7  
8  
9

### 10 **Confidentiality**

11  
12 Participant confidentiality is strictly held in trust by the participating investigators, research  
13 staff and their agents. This confidentiality is extended to cover testing of biological samples in  
14 addition to the clinical information relating to participants. The study protocol, documentation,  
15 data and all other information generated will be held in strict confidence. No information  
16 concerning the study or the data will be released to any unauthorised third party, without prior  
17 written approval of the Coordinating Centre. The Coordinating Centre and regulatory  
18 authorities may inspect all documents and records required to be maintained by the  
19 Investigator, including but not limited to, medical records and pharmacy records for the infants  
20 in this study subject to individuals having obtained approval/clearance through State/National  
21 Governments and HREC as required by local laws. The study site will permit access to such  
22 records. Clinical information will not be released without written permission of the  
23 parent/guardian, except as necessary for monitoring by HREC or regulatory agencies.  
24  
25  
26  
27  
28  
29  
30  
31  
32  
33  
34  
35  
36  
37  
38  
39

### 40 **Dissemination plan**

41  
42 Study findings will be submitted for peer-reviewed publication and for presentation at  
43 appropriate local and international conferences. In addition, study findings will be  
44 disseminated to participants through a one-page lay summary. Results will be made available  
45 to the wider community through social media avenues and the South Australian Health &  
46 Medical Research Institute website.  
47  
48  
49  
50  
51  
52  
53  
54  
55  
56  
57  
58  
59  
60

## Trial status

This enrolment phase of this trial completed on 27<sup>th</sup> April 2017 with successful attainment of sample size (n=5544). Completion of study follow up appointments and collection of labour and birth data from participant medical records will be completed by December 2017.

## Strengths and limitations of this study

- This study is the largest randomised controlled trial with adequate power that is designed to assess the effect of  $\omega$ -3 LCPUFA supplementation in pregnancy on the incidence of early preterm birth as the primary outcome.
- The study uses an innovative intervention strategy, which is unique compared with other trials in this field. The intervention targets the period before and during the time when early preterm birth is likely to occur and it is ceased at 34 weeks' gestation, at which time early preterm birth has been prevented. This strategy may reduce the risk of post-term birth.
- The study assesses maternal LCPUFA status at baseline and at the end of the intervention period, providing an independent biomarker of compliance, in addition to maternal self-report and capsule back count.
- The study is conducted in an industrialised setting where intake of  $\omega$ -3 LCPUFA is low. Findings from this study may not be applicable in populations with high intake of  $\omega$ -3 LCPUFA.

## Acknowledgements

We thank the research and clinical teams at all participating study centres.



### **Authors' contributions**

MM, JQ, RAG, AJM and SJZ conceived and designed the study with KPB contributing to ongoing study implementation and management. LY provided statistical expertise. SJZ and KPB wrote the first draft of the manuscript. All authors contributed to refinement of the study protocol and approved the final manuscript.

### **Funding statement**

This work was supported by the National Health and Medical Research Council (NHMRC) of Australia, grant number 1050468. The Study product is donated by Efamol Ltd/Wassen Intl. Ltd. An NHMRC Fellowship supports RAG (Senior Principal Research Fellow 1046207) and MM (Principal Research Fellow 1061704) and LNY (Early Career Research Fellow 1052388). The funding bodies had no role in the design of this study and will not have any role during the conduct of the study, data collection, study management, analyses and interpretation of the data or in the writing, review or approval publications. The contents of the published material are solely the responsibility of the authors and do not reflect the views of the NHMRC.

### **Competing Interests**

The authors declare: financial support for the submitted work from the National Health and Medical Research Council (NHMRC) Australia (Project Grant 1050468). RAG serves on a scientific advisory board for Fonterra; MM serves on scientific advisory boards for Nestle and Fonterra. Associated Honoraria for RAG and MM are paid to their institutions to support conference travel and continuing education for postgraduate students and early career researchers. The authors declare that they have no competing interests.

**Additional authors and members of the ORIP Investigative Team**

The following are members of the ORIP (Omega-3 fatty acids to Reduce the Incidence of Preterm birth) Investigative team: Gus Dekker (Northern Adelaide Health Service [Lyell McEwin Hospital and Modbury Hospital], Adelaide, South Australia. Elinor Atkinson (Flinders Medical Centre, Adelaide, South Australia), Jodie Dodd (Women's and Children's Hospital, Adelaide, South Australia), Jacqueline van Dam & Nisha Khot (Mercy Hospital, Werribee, Melbourne, Victoria), Huda Safa (Mater Mothers' Hospital, Brisbane, Queensland).

## References

1. Thornton S. Preterm Birth: Causes, Consequences and Prevention. *The Obstetrician & Gynaecologist* 2008;10(4):280-80.
2. Lumley J. Defining the problem: the epidemiology of preterm birth. *BJOG: An International Journal of Obstetrics & Gynaecology* 2003;110(s20):3-7.
3. Martin JA, Hamilton BE, Sutton PD, et al. Births: final data for 2004. *Natl Vital Stat Rep* 2006;55(1):1-101. [published Online First: 2006/10/21]
4. Pretorius C, Jagatt A, Lamont RF. The relationship between periodontal disease, bacterial vaginosis, and preterm birth. *Journal of perinatal medicine* 2007;35(2):93-99.
5. Gravett MG. Causes of preterm delivery. *Semin Perinatol* 1984
6. Karim SM. The role of prostaglandins in human parturition. *Proceedings of the Royal Society of Medicine* 1971;64(1):10-2. [published Online First: 1971/01/01]
7. Brazle AE, Johnson BJ, Webel SK, et al. Omega-3 fatty acids in the gravid pig uterus as affected by maternal supplementation with omega-3 fatty acids. *Journal of Animal Science* 2009;87(3):994-1002. doi: 10.2527/jas.2007-0626
8. Prescott SL. Early-life environmental determinants of allergic diseases and the wider pandemic of inflammatory noncommunicable diseases. *Journal of allergy and clinical immunology* 2013;131(1):23-30.
9. Meyer BJ, Mann NJ, Lewis JL, et al. Dietary intakes and food sources of omega-6 and omega-3 polyunsaturated fatty acids. *Lipids* 2003;38(4):391-8.
10. Oken E, Kleinman KP, Berland WE, et al. Decline in fish consumption among pregnant women after a national mercury advisory. *Obstet Gynecol* 2003;102(2):346-51. doi: S0029784403004848 [pii] [published Online First: 2003/08/09]

- 1  
2  
3  
4  
5  
6  
7  
8  
9  
10  
11  
12  
13  
14  
15  
16  
17  
18  
19  
20  
21  
22  
23  
24  
25  
26  
27  
28  
29  
30  
31  
32  
33  
34  
35  
36  
37  
38  
39  
40  
41  
42  
43  
44  
45  
46  
47  
48  
49  
50  
51  
52  
53  
54  
55  
56  
57  
58  
59  
60
11. Escamilla-Nuñez MC, Barraza-Villarreal A, Hernández-Cadena L, et al. Omega-3 fatty acid supplementation during pregnancy and respiratory symptoms in children. *CHEST Journal* 2014;146(2):373-82.
  12. Bulstra-Ramakers MT, Huisjes HJ, Visser GH. The effects of 3g eicosapentaenoic acid daily on recurrence of intrauterine growth retardation and pregnancy induced hypertension. *Br J Obstet Gynaecol* 1995;102(2):123-6. [published Online First: 1995/02/01]
  13. Olsen SF, Secher NJ, Tabor A, et al. Randomised clinical trials of fish oil supplementation in high risk pregnancies. Fish Oil Trials In Pregnancy (FOTIP) Team. *BJOG : an international journal of obstetrics and gynaecology* 2000;107(3):382-95. [published Online First: 2000/03/31]
  14. Horvath A, Koletzko B, Szajewska H. Effect of supplementation of women in high-risk pregnancies with long-chain polyunsaturated fatty acids on pregnancy outcomes and growth measures at birth: a meta-analysis of randomized controlled trials. *British Journal of Nutrition* 2007;98(02):253-59.
  15. Szajewska H, Horvath A, Koletzko B. Effect of n-3 long-chain polyunsaturated fatty acid supplementation of women with low-risk pregnancies on pregnancy outcomes and growth measures at birth: a meta-analysis of randomized controlled trials. *Am J Clin Nutr* 2006;83(6):1337-44.
  16. Makrides M, Gibson RA, McPhee AJ, et al. Effect of DHA supplementation during pregnancy on maternal depression and neurodevelopment of young children: a randomized controlled trial. *Jama* 2010;304(15):1675-83. doi: 10.1001/jama.2010.1507
  17. Carlson SE, Colombo J, Gajewski BJ, et al. DHA supplementation and pregnancy outcomes. *The American Journal of Clinical Nutrition* 2013;97(4):808-15. doi: 10.3945/ajcn.112.050021

- 1  
2  
3  
4  
5  
6  
7  
8  
9  
10  
11  
12  
13  
14  
15  
16  
17  
18  
19  
20  
21  
22  
23  
24  
25  
26  
27  
28  
29  
30  
31  
32  
33  
34  
35  
36  
37  
38  
39  
40  
41  
42  
43  
44  
45  
46  
47  
48  
49  
50  
51  
52  
53  
54  
55  
56  
57  
58  
59  
60
18. Makrides M, Duley L, Olsen SF. Marine oil, and other prostaglandin precursor, supplementation for pregnancy uncomplicated by pre-eclampsia or intrauterine growth restriction. *Cochrane Database Syst Rev* 2006;3
19. Philippa Middleton JG, Emily Shepherd, Maria Makrides. Omega-3 supplementation during pregnancy: an updated Cochrane review. *J Paediatr Child Health* 2017;53:68-69. doi: 10.1111/jpc.13494\_201
20. Australian and New Zealand Neonatal Network A. Australian and New Zealand Network Data Dictionary, Definitions for audit. Australian and New Zealand Network Data Dictionary. Australia, 2012/2013.
21. Moher D, Schulz KF, Altman DG. The CONSORT statement: revised recommendations for improving the quality of reports of parallel group randomized trials. *BMC Medical Research Methodology* 2001;1(1):2.
22. Governance R. Site Specific Assessment: Submission Guidelines: Women's and Children's Health Network RG, ed. Site Specific Assessment: Submission Guidelines. Adelaide: Women's and Children's Health Network, 2016.

1  
2  
3 **Figure 1. Flow chart for determining estimated date of delivery (EDD)**

4 LMP, last menstrual period; GA, gestational age; U/S ultrasound; w, weeks

- 5  
6 (1) *Where multiple ultrasounds are performed within a given GA range, the earliest ultrasound will be used to*  
7 *determine gestational age.*  
8 (2) *Where multiple ultrasounds are performed within a given GA range, the latest ultrasound will be used to*  
9 *determine gestational age.*  
10

11  
12  
13  
14  
15 **Figure 2. ORIP Trial Schedule**

16  
17 *\*\*-t1 = <20 weeks' gestation; t1 = 2 weeks' post randomization and allocation; t2 = 28 weeks'*  
18 *gestation; t3 = 34 weeks' gestation or birth, whichever occurs first; t x= 6 weeks post estimated due*  
19 *date.*  
20  
21  
22  
23  
24  
25  
26  
27  
28  
29  
30  
31  
32  
33  
34  
35  
36  
37  
38  
39  
40  
41  
42  
43  
44  
45  
46  
47  
48  
49  
50  
51  
52  
53  
54  
55  
56  
57  
58  
59  
60

Figure 1. Flow chart for determining estimated date of delivery (EDD)

LMP, last menstrual period; GA, gestational age; U/S ultrasound; w, weeks

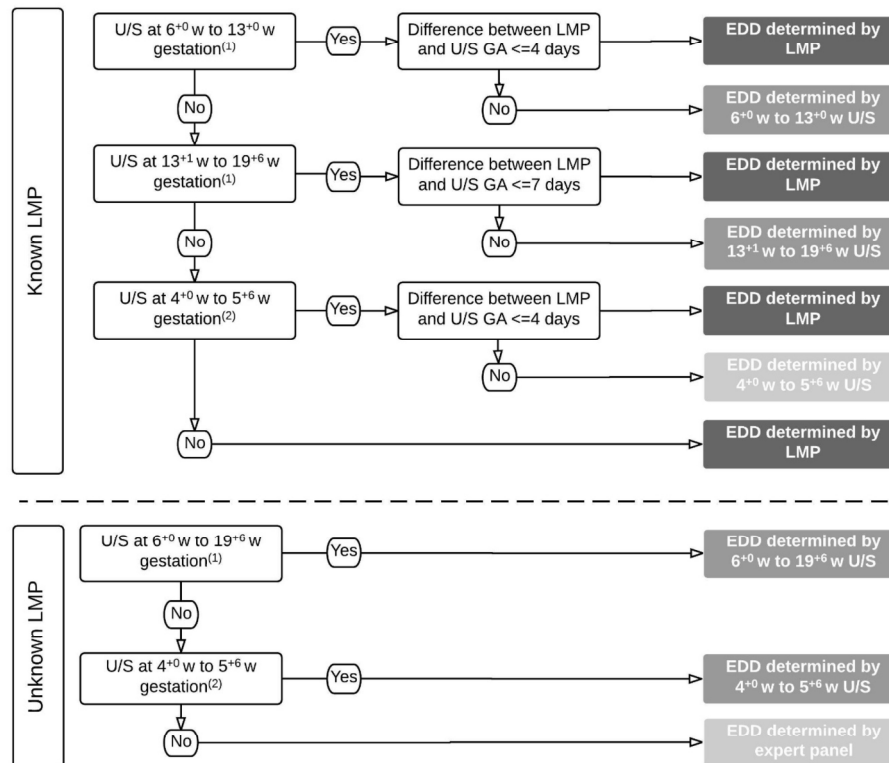

- (1) Where multiple ultrasounds are performed within a given GA range, the earliest ultrasound will be used to determine gestational age.
- (2) Where multiple ultrasounds are performed within a given GA range, the latest ultrasound will be used to determine gestational age.

229x248mm (300 x 300 DPI)

**Figure 2. ORIP Trial Schedule**

\*\*-t<sub>1</sub> = <20 weeks' gestation; t<sub>1</sub> = 2 weeks' post randomization and allocation; t<sub>2</sub> = 28 weeks' gestation; t<sub>3</sub> = 34 weeks' gestation or birth, whichever occurs first; t<sub>x</sub> = 6 weeks post estimated due date.

|                                                               | Enrolment       | Allocation | Post-allocation |                |                | Completion     |
|---------------------------------------------------------------|-----------------|------------|-----------------|----------------|----------------|----------------|
| TIMEPOINT**                                                   | -t <sub>1</sub> | 0          | t <sub>1</sub>  | t <sub>2</sub> | t <sub>3</sub> | t <sub>x</sub> |
| <b>ENROLMENT:</b>                                             |                 |            |                 |                |                |                |
| Eligibility screening                                         | X               |            |                 |                |                |                |
| Informed consent                                              | X               |            |                 |                |                |                |
| Randomisation                                                 | X               |            |                 |                |                |                |
| Allocation                                                    |                 | X          |                 |                |                |                |
| <b>INTERVENTION:</b>                                          |                 |            |                 |                |                |                |
| <i>Treatment: 3x500mg capsules ω-3 LCPUFA per day</i>         |                 |            |                 |                |                |                |
| <i>OR</i>                                                     |                 |            |                 |                |                |                |
| <i>Control: 3x500mg capsules blended vegetable oils</i>       |                 |            |                 |                |                |                |
| <b>ASSESSMENTS:</b>                                           |                 |            |                 |                |                |                |
| <i>Fatty Acid Analysis (finger prick)</i>                     | X               |            |                 |                | X              |                |
| <i>Maternal clinical &amp; demographic details</i>            | X               |            |                 |                |                |                |
| <i>Compliance &amp; side effects</i>                          |                 |            | X               | X              | X              |                |
| <i>Labour &amp; birth data extracted from medical records</i> |                 |            |                 |                |                | X              |

218x225mm (300 x 300 DPI)

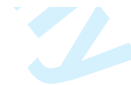



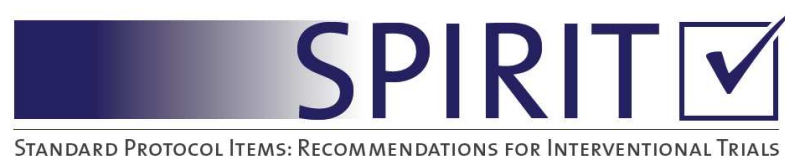

SPIRIT 2013 Checklist: Recommended items to address in a clinical trial protocol and related documents\*

| Section/item                      | Item No | Description                                                                                                                                                                                                                                                                              | Addressed on page number |
|-----------------------------------|---------|------------------------------------------------------------------------------------------------------------------------------------------------------------------------------------------------------------------------------------------------------------------------------------------|--------------------------|
| <b>Administrative information</b> |         |                                                                                                                                                                                                                                                                                          |                          |
| Title                             | 1       | Descriptive title identifying the study design, population, interventions, and, if applicable, trial acronym                                                                                                                                                                             | 1                        |
| Trial registration                | 2a      | Trial identifier and registry name. If not yet registered, name of intended registry                                                                                                                                                                                                     | 4                        |
|                                   | 2b      | All items from the World Health Organization Trial Registration Data Set                                                                                                                                                                                                                 | Yes                      |
| Protocol version                  | 3       | Date and version identifier                                                                                                                                                                                                                                                              | Supp.                    |
| Funding                           | 4       | Sources and types of financial, material, and other support                                                                                                                                                                                                                              | 20                       |
| Roles and responsibilities        | 5a      | Names, affiliations, and roles of protocol contributors                                                                                                                                                                                                                                  | 1                        |
|                                   | 5b      | Name and contact information for the trial sponsor                                                                                                                                                                                                                                       | 1                        |
|                                   | 5c      | Role of study sponsor and funders, if any, in study design; collection, management, analysis, and interpretation of data; writing of the report; and the decision to submit the report for publication, including whether they will have ultimate authority over any of these activities | N/A                      |
|                                   | 5d      | Composition, roles, and responsibilities of the coordinating centre, steering committee, endpoint adjudication committee, data management team, and other individuals or groups overseeing the trial, if applicable (see Item 21a for data monitoring committee)                         | 16                       |

## Introduction

|                                                           |     |                                                                                                                                                                                                                                                                                                                                                                                |             |
|-----------------------------------------------------------|-----|--------------------------------------------------------------------------------------------------------------------------------------------------------------------------------------------------------------------------------------------------------------------------------------------------------------------------------------------------------------------------------|-------------|
| Background and rationale                                  | 6a  | Description of research question and justification for undertaking the trial, including summary of relevant studies (published and unpublished) examining benefits and harms for each intervention                                                                                                                                                                             | 5           |
|                                                           | 6b  | Explanation for choice of comparators                                                                                                                                                                                                                                                                                                                                          | 5           |
| Objectives                                                | 7   | Specific objectives or hypotheses                                                                                                                                                                                                                                                                                                                                              | 10, 11      |
| Trial design                                              | 8   | Description of trial design including type of trial (eg, parallel group, crossover, factorial, single group), allocation ratio, and framework (eg, superiority, equivalence, noninferiority, exploratory)                                                                                                                                                                      | 8           |
| <b>Methods: Participants, interventions, and outcomes</b> |     |                                                                                                                                                                                                                                                                                                                                                                                |             |
| Study setting                                             | 9   | Description of study settings (eg, community clinic, academic hospital) and list of countries where data will be collected. Reference to where list of study sites can be obtained                                                                                                                                                                                             | 8           |
| Eligibility criteria                                      | 10  | Inclusion and exclusion criteria for participants. If applicable, eligibility criteria for study centres and individuals who will perform the interventions (eg, surgeons, psychotherapists)                                                                                                                                                                                   | 8, 9        |
| Interventions                                             | 11a | Interventions for each group with sufficient detail to allow replication, including how and when they will be administered                                                                                                                                                                                                                                                     | 9           |
|                                                           | 11b | Criteria for discontinuing or modifying allocated interventions for a given trial participant (eg, drug dose change in response to harms, participant request, or improving/worsening disease)                                                                                                                                                                                 | N/A         |
|                                                           | 11c | Strategies to improve adherence to intervention protocols, and any procedures for monitoring adherence (eg, drug tablet return, laboratory tests)                                                                                                                                                                                                                              | 10          |
|                                                           | 11d | Relevant concomitant care and interventions that are permitted or prohibited during the trial                                                                                                                                                                                                                                                                                  | N/A         |
| Outcomes                                                  | 12  | Primary, secondary, and other outcomes, including the specific measurement variable (eg, systolic blood pressure), analysis metric (eg, change from baseline, final value, time to event), method of aggregation (eg, median, proportion), and time point for each outcome. Explanation of the clinical relevance of chosen efficacy and harm outcomes is strongly recommended | 10, 11      |
| Participant timeline                                      | 13  | Time schedule of enrolment, interventions (including any run-ins and washouts), assessments, and visits for participants. A schematic diagram is highly recommended (see Figure)                                                                                                                                                                                               | 12 & Fig. 2 |

1  
2  
3 Sample size 14 Estimated number of participants needed to achieve study objectives and how it was determined, including 12, 13  
4 clinical and statistical assumptions supporting any sample size calculations

5  
6 Recruitment 15 Strategies for achieving adequate participant enrolment to reach target sample size 13  
7

8 **Methods: Assignment of interventions (for controlled trials)**  
9

10 Allocation:

11  
12 Sequence generation 16a Method of generating the allocation sequence (eg, computer-generated random numbers), and list of any 13  
13 factors for stratification. To reduce predictability of a random sequence, details of any planned restriction  
14 (eg, blocking) should be provided in a separate document that is unavailable to those who enrol participants  
15 or assign interventions

16  
17 Allocation concealment mechanism 16b Mechanism of implementing the allocation sequence (eg, central telephone; sequentially numbered, 13  
18 opaque, sealed envelopes), describing any steps to conceal the sequence until interventions are assigned  
19  
20

21  
22 Implementation 16c Who will generate the allocation sequence, who will enrol participants, and who will assign participants to 13, 14  
23 interventions  
24

25 Blinding (masking) 17a Who will be blinded after assignment to interventions (eg, trial participants, care providers, outcome 14  
26 assessors, data analysts), and how  
27

28 17b If blinded, circumstances under which unblinding is permissible, and procedure for revealing a participant's 14  
29 allocated intervention during the trial  
30  
31

32 **Methods: Data collection, management, and analysis**  
33

34 Data collection methods 18a Plans for assessment and collection of outcome, baseline, and other trial data, including any related 14, 15  
35 processes to promote data quality (eg, duplicate measurements, training of assessors) and a description of  
36 study instruments (eg, questionnaires, laboratory tests) along with their reliability and validity, if known.  
37 Reference to where data collection forms can be found, if not in the protocol  
38

39 18b Plans to promote participant retention and complete follow-up, including list of any outcome data to be 14, 15  
40 collected for participants who discontinue or deviate from intervention protocols  
41  
42  
43  
44  
45

|    |                                 |     |                                                                                                                                                                                                                                                                                                                                       |               |
|----|---------------------------------|-----|---------------------------------------------------------------------------------------------------------------------------------------------------------------------------------------------------------------------------------------------------------------------------------------------------------------------------------------|---------------|
| 1  |                                 |     |                                                                                                                                                                                                                                                                                                                                       |               |
| 2  |                                 |     |                                                                                                                                                                                                                                                                                                                                       |               |
| 3  | Data management                 | 19  | Plans for data entry, coding, security, and storage, including any related processes to promote data quality (eg, double data entry; range checks for data values). Reference to where details of data management procedures can be found, if not in the protocol                                                                     | 15, 16        |
| 4  |                                 |     |                                                                                                                                                                                                                                                                                                                                       |               |
| 5  |                                 |     |                                                                                                                                                                                                                                                                                                                                       |               |
| 6  |                                 |     |                                                                                                                                                                                                                                                                                                                                       |               |
| 7  | Statistical methods             | 20a | Statistical methods for analysing primary and secondary outcomes. Reference to where other details of the statistical analysis plan can be found, if not in the protocol                                                                                                                                                              | 15, Supp. SAP |
| 8  |                                 |     |                                                                                                                                                                                                                                                                                                                                       |               |
| 9  |                                 |     |                                                                                                                                                                                                                                                                                                                                       |               |
| 10 |                                 | 20b | Methods for any additional analyses (eg, subgroup and adjusted analyses)                                                                                                                                                                                                                                                              | 16            |
| 11 |                                 |     |                                                                                                                                                                                                                                                                                                                                       |               |
| 12 |                                 | 20c | Definition of analysis population relating to protocol non-adherence (eg, as randomised analysis), and any statistical methods to handle missing data (eg, multiple imputation)                                                                                                                                                       | 16            |
| 13 |                                 |     |                                                                                                                                                                                                                                                                                                                                       |               |
| 14 |                                 |     |                                                                                                                                                                                                                                                                                                                                       |               |
| 15 |                                 |     |                                                                                                                                                                                                                                                                                                                                       |               |
| 16 | <b>Methods: Monitoring</b>      |     |                                                                                                                                                                                                                                                                                                                                       |               |
| 17 |                                 |     |                                                                                                                                                                                                                                                                                                                                       |               |
| 18 | Data monitoring                 | 21a | Composition of data monitoring committee (DMC); summary of its role and reporting structure; statement of whether it is independent from the sponsor and competing interests; and reference to where further details about its charter can be found, if not in the protocol. Alternatively, an explanation of why a DMC is not needed | 16, 17        |
| 19 |                                 |     |                                                                                                                                                                                                                                                                                                                                       |               |
| 20 |                                 |     |                                                                                                                                                                                                                                                                                                                                       |               |
| 21 |                                 |     |                                                                                                                                                                                                                                                                                                                                       |               |
| 22 |                                 |     |                                                                                                                                                                                                                                                                                                                                       |               |
| 23 |                                 | 21b | Description of any interim analyses and stopping guidelines, including who will have access to these interim results and make the final decision to terminate the trial                                                                                                                                                               | 16            |
| 24 |                                 |     |                                                                                                                                                                                                                                                                                                                                       |               |
| 25 |                                 |     |                                                                                                                                                                                                                                                                                                                                       |               |
| 26 | Harms                           | 22  | Plans for collecting, assessing, reporting, and managing solicited and spontaneously reported adverse events and other unintended effects of trial interventions or trial conduct                                                                                                                                                     | 17            |
| 27 |                                 |     |                                                                                                                                                                                                                                                                                                                                       |               |
| 28 |                                 |     |                                                                                                                                                                                                                                                                                                                                       |               |
| 29 | Auditing                        | 23  | Frequency and procedures for auditing trial conduct, if any, and whether the process will be independent from investigators and the sponsor                                                                                                                                                                                           | 14, 15        |
| 30 |                                 |     |                                                                                                                                                                                                                                                                                                                                       |               |
| 31 |                                 |     |                                                                                                                                                                                                                                                                                                                                       |               |
| 32 |                                 |     |                                                                                                                                                                                                                                                                                                                                       |               |
| 33 | <b>Ethics and dissemination</b> |     |                                                                                                                                                                                                                                                                                                                                       |               |
| 34 |                                 |     |                                                                                                                                                                                                                                                                                                                                       |               |
| 35 | Research ethics approval        | 24  | Plans for seeking research ethics committee/institutional review board (REC/IRB) approval                                                                                                                                                                                                                                             | 17            |
| 36 |                                 |     |                                                                                                                                                                                                                                                                                                                                       |               |
| 37 |                                 |     |                                                                                                                                                                                                                                                                                                                                       |               |
| 38 | Protocol amendments             | 25  | Plans for communicating important protocol modifications (eg, changes to eligibility criteria, outcomes, analyses) to relevant parties (eg, investigators, REC/IRBs, trial participants, trial registries, journals, regulators)                                                                                                      | 17            |
| 39 |                                 |     |                                                                                                                                                                                                                                                                                                                                       |               |
| 40 |                                 |     |                                                                                                                                                                                                                                                                                                                                       |               |
| 41 |                                 |     |                                                                                                                                                                                                                                                                                                                                       |               |
| 42 |                                 |     |                                                                                                                                                                                                                                                                                                                                       |               |
| 43 |                                 |     |                                                                                                                                                                                                                                                                                                                                       |               |
| 44 |                                 |     |                                                                                                                                                                                                                                                                                                                                       |               |
| 45 |                                 |     |                                                                                                                                                                                                                                                                                                                                       |               |
| 46 |                                 |     |                                                                                                                                                                                                                                                                                                                                       |               |
| 47 |                                 |     |                                                                                                                                                                                                                                                                                                                                       |               |
| 48 |                                 |     |                                                                                                                                                                                                                                                                                                                                       |               |
| 49 |                                 |     |                                                                                                                                                                                                                                                                                                                                       |               |



|    |                               |     |                                                                                                                                                                                                                                                                                     |            |
|----|-------------------------------|-----|-------------------------------------------------------------------------------------------------------------------------------------------------------------------------------------------------------------------------------------------------------------------------------------|------------|
| 1  |                               |     |                                                                                                                                                                                                                                                                                     |            |
| 2  |                               |     |                                                                                                                                                                                                                                                                                     |            |
| 3  | Consent or assent             | 26a | Who will obtain informed consent or assent from potential trial participants or authorised surrogates, and how (see Item 32)                                                                                                                                                        | 13         |
| 4  |                               |     |                                                                                                                                                                                                                                                                                     |            |
| 5  |                               |     |                                                                                                                                                                                                                                                                                     |            |
| 6  |                               | 26b | Additional consent provisions for collection and use of participant data and biological specimens in ancillary studies, if applicable                                                                                                                                               | N/A        |
| 7  |                               |     |                                                                                                                                                                                                                                                                                     |            |
| 8  |                               |     |                                                                                                                                                                                                                                                                                     |            |
| 9  | Confidentiality               | 27  | How personal information about potential and enrolled participants will be collected, shared, and maintained in order to protect confidentiality before, during, and after the trial                                                                                                | 18         |
| 10 |                               |     |                                                                                                                                                                                                                                                                                     |            |
| 11 |                               |     |                                                                                                                                                                                                                                                                                     |            |
| 12 | Declaration of interests      | 28  | Financial and other competing interests for principal investigators for the overall trial and each study site                                                                                                                                                                       | 20         |
| 13 |                               |     |                                                                                                                                                                                                                                                                                     |            |
| 14 |                               |     |                                                                                                                                                                                                                                                                                     |            |
| 15 | Access to data                | 29  | Statement of who will have access to the final trial dataset, and disclosure of contractual agreements that limit such access for investigators                                                                                                                                     | N/A        |
| 16 |                               |     |                                                                                                                                                                                                                                                                                     |            |
| 17 |                               |     |                                                                                                                                                                                                                                                                                     |            |
| 18 | Ancillary and post-trial care | 30  | Provisions, if any, for ancillary and post-trial care, and for compensation to those who suffer harm from trial participation                                                                                                                                                       | Supp. PICF |
| 19 |                               |     |                                                                                                                                                                                                                                                                                     |            |
| 20 |                               |     |                                                                                                                                                                                                                                                                                     |            |
| 21 | Dissemination policy          | 31a | Plans for investigators and sponsor to communicate trial results to participants, healthcare professionals, the public, and other relevant groups (eg, via publication, reporting in results databases, or other data sharing arrangements), including any publication restrictions | 18         |
| 22 |                               |     |                                                                                                                                                                                                                                                                                     |            |
| 23 |                               |     |                                                                                                                                                                                                                                                                                     |            |
| 24 |                               |     |                                                                                                                                                                                                                                                                                     |            |
| 25 |                               |     |                                                                                                                                                                                                                                                                                     |            |
| 26 |                               | 31b | Authorship eligibility guidelines and any intended use of professional writers                                                                                                                                                                                                      | N/A        |
| 27 |                               |     |                                                                                                                                                                                                                                                                                     |            |
| 28 |                               | 31c | Plans, if any, for granting public access to the full protocol, participant-level dataset, and statistical code                                                                                                                                                                     | N/A        |
| 29 |                               |     |                                                                                                                                                                                                                                                                                     |            |
| 30 | <b>Appendices</b>             |     |                                                                                                                                                                                                                                                                                     |            |
| 31 |                               |     |                                                                                                                                                                                                                                                                                     |            |
| 32 | Informed consent materials    | 32  | Model consent form and other related documentation given to participants and authorised surrogates                                                                                                                                                                                  | Supp. PICF |
| 33 |                               |     |                                                                                                                                                                                                                                                                                     |            |
| 34 |                               |     |                                                                                                                                                                                                                                                                                     |            |
| 35 | Biological specimens          | 33  | Plans for collection, laboratory evaluation, and storage of biological specimens for genetic or molecular analysis in the current trial and for future use in ancillary studies, if applicable                                                                                      | Supp. PICF |
| 36 |                               |     |                                                                                                                                                                                                                                                                                     |            |
| 37 |                               |     |                                                                                                                                                                                                                                                                                     |            |

38 \*It is strongly recommended that this checklist be read in conjunction with the SPIRIT 2013 Explanation & Elaboration for important clarification on the items.  
 39 Amendments to the protocol should be tracked and dated. The SPIRIT checklist is copyrighted by the SPIRIT Group under the Creative Commons  
 40 "[Attribution-NonCommercial-NoDerivs 3.0 Unported](https://creativecommons.org/licenses/by-nc-nd/3.0/)" license.  
 41
