# Supplementary material for: Study protocol for a randomised controlled trial evaluating the effect of prenatal omega-3 LCPUFA supplementation to reduce the incidence of preterm birth: the ORIP trial
Source: PubMed Central journal article supplement — BMJ Open. 2017 Sep 24;7(9):e018360. doi: 10.1136/bmjopen-2017-018360 (PMC5623491; doi:10.1136/bmjopen-2017-018360), 2017-09-24
Supplement: bmjopen-2017-018360.reviewer_comments.pdf [file bmjopen-2017-018360.reviewer_comments.pdf]

## PEER REVIEW HISTORY

BMJ Open publishes all reviews undertaken for accepted manuscripts. Reviewers are asked to complete a checklist review form (<http://bmjopen.bmj.com/site/about/resources/checklist.pdf>) and are provided with free text boxes to elaborate on their assessment. These free text comments are reproduced below.

### ARTICLE DETAILS

|                            |                                                                                                                                                                            |
|----------------------------|----------------------------------------------------------------------------------------------------------------------------------------------------------------------------|
| <b>TITLE (PROVISIONAL)</b> | Study protocol for a randomized controlled trial evaluating the effect of prenatal omega-3 LCPUFA supplementation to reduce the incidence of preterm birth: The ORIP trial |
| <b>AUTHORS</b>             | Zhou, Shao; Best, Karen; Gibson, Robert; McPhee, Andrew; Yelland, Lisa; Quinlivan, Julie; Makrides, Maria                                                                  |

### VERSION 1 - REVIEW

|                        |                                                |
|------------------------|------------------------------------------------|
| <b>REVIEWER</b>        | Philip Calder<br>University of Southampton, UK |
| <b>REVIEW RETURNED</b> | 07-Jul-2017                                    |

|                         |                                                                                                                                                                                                                                                                                                                                                                                                                                                                                                                                                                                                                                                                                                                                                                                                     |
|-------------------------|-----------------------------------------------------------------------------------------------------------------------------------------------------------------------------------------------------------------------------------------------------------------------------------------------------------------------------------------------------------------------------------------------------------------------------------------------------------------------------------------------------------------------------------------------------------------------------------------------------------------------------------------------------------------------------------------------------------------------------------------------------------------------------------------------------|
| <b>GENERAL COMMENTS</b> | <p>This manuscript describes a study protocol. The study involves a RCT of 900 mg/day DHA rich oil in pregnant women. Intervention lasts from wk 20 to wk 34 of pregnancy. Sample size is about 5500. Primary outcome is Early Pre term Birth. Recruitment into the study is complete. This is an important trial. The manuscript is well written and very clear. I have only some minor issues for attention:</p> <ol style="list-style-type: none"><li>1. Page 7, line 10. acid -&gt; acids</li><li>2. Page 7, line 14. play -&gt; plays</li><li>3. Page 7, line 14. are -&gt; is</li><li>4. Page 8, near end of Background. planned -&gt; plan</li><li>5. Inclusion criteria. Shouldn't "meet all" "meet both"?</li><li>6. Exclusion criteria. delete "fetal" from "fetus should ...."</li></ol> |
|-------------------------|-----------------------------------------------------------------------------------------------------------------------------------------------------------------------------------------------------------------------------------------------------------------------------------------------------------------------------------------------------------------------------------------------------------------------------------------------------------------------------------------------------------------------------------------------------------------------------------------------------------------------------------------------------------------------------------------------------------------------------------------------------------------------------------------------------|

|                        |                                                                                                                           |
|------------------------|---------------------------------------------------------------------------------------------------------------------------|
| <b>REVIEWER</b>        | DR SUMIT KAR<br>East Surrey Hospital<br>Surrey & Sussex NHS Trust<br>Canada Avenue<br>Redhill<br>RM15RH<br>United Kingdom |
| <b>REVIEW RETURNED</b> | 22-Jul-2017                                                                                                               |

|                         |                                                                                                  |
|-------------------------|--------------------------------------------------------------------------------------------------|
| <b>GENERAL COMMENTS</b> | This is a good quality trial with immense potential . Large number of participants are involved. |
|-------------------------|--------------------------------------------------------------------------------------------------|

## **VERSION 1 – AUTHOR RESPONSE**

Please find a revised tracked changes version of this manuscript incorporating suggested edits:

1. Page 7, line 10. 'acid' changed to 'acids' (Page 4, in attached document)
2. Page 7, line 14. 'play' changed to 'plays' (Page 4, in attached document)
3. Page 7, line 14. 'are' changed to 'is' (Page 4, in attached document)
4. Page 8, near end of Background. 'planned' changed to 'plan' (Page 6, in attached document)
5. Inclusion criteria. Shouldn't 'meet all' changed to 'meet both' (Page 7, in attached document)
6. Exclusion criteria. Deleted 'fetal' from 'fetus should ...." (Page 8, in attached document)
